# Supplementary material for: New Eunicellin-Type Diterpenes from the Panamanian Octocoral Briareum asbestinum
Source: PubMed Central journal article supplement (PMC7074288; doi:10.3390/md18020084), 2020-01-27
Supplement: marinedrugs-18-00084-s001.pdf [file marinedrugs-18-00084-s001.pdf]

## Supplementary data

# New Eunicellin-type Diterpenes from the Panamanian Octocoral *Briareum asbestinum*

Marcelino Gutiérrez <sup>1,\*</sup>, Ricardo Santamaría <sup>1</sup>, José Félix Gómez-Reyes <sup>1</sup>, Héctor M. Guzmán <sup>2</sup>, Javier Ávila-Román <sup>3</sup>, Virginia Motilva <sup>4</sup>, Elena Talero <sup>4,\*</sup>

<sup>1</sup> Centro de Biodiversidad y Descubrimiento de Drogas, Instituto de Investigaciones Científicas y Servicios de Alta Tecnología (INDICASAT AIP), Panamá, Apartado 0843-01103, República de Panamá; [rsantamaria@indicat.org.pa](mailto:rsantamaria@indicat.org.pa) (R.S.), [gomezjosefelix@gmail.com](mailto:gomezjosefelix@gmail.com) (J.G.)

<sup>2</sup> Smithsonian Tropical Research Institute, Balboa, Ancon, P. O. Box 0843-03092, Republic of Panama; [guzmanh@si.edu](mailto:guzmanh@si.edu)

<sup>3</sup> Department of Biochemistry and Biotechnology, Faculty of Chemistry, Universitat Rovira i Virgili, Tarragona 43007, Spain; [franciscojavier.avila@urv.cat](mailto:franciscojavier.avila@urv.cat) (J. A-R)

<sup>4</sup> Department of Pharmacology, Faculty of Pharmacy, University of Seville, Seville 41012, Spain; [motilva@us.es](mailto:motilva@us.es) (V.M.); [etalero@us.es](mailto:etalero@us.es) (E.T.)

## Contents

**Figure S1.** Briarellin T, <sup>1</sup>H NMR spectrum

**Figure S2.** Briarellin T, <sup>13</sup>C NMR spectrum

**Figure S3.** Briarellin T, DEPT-135 spectrum

**Figure S4.** Briarellin T, COSY spectrum

**Figure S5.** Briarellin T, HSQC spectrum

**Figure S6.** Briarellin T, HMBC spectrum

**Figure S7.** Briarellin T, NOE spectra

**Figure S8.** Briarellin T, HR-ESITOFMS spectra

**Figure S9.** Asbestinin 27, <sup>1</sup>H NMR spectrum

**Figure S10.** Asbestinin 27, <sup>13</sup>C NMR spectrum

**Figure S11.** Asbestinin 27, DEPT-135 spectrum

**Figure S12.** Asbestinin 27, COSY spectrum

**Figure S13.** Asbestinin 27, HSQC spectrum

**Figure S14.** Asbestinin 27, HMBC spectrum

**Figure S15.** Asbestinin 27, NOE spectra

**Figure S16.** Asbestinin 27, HR-ESITOFMS spectra

**Figure S17.** Asbestinin 28,  $^1\text{H}$  NMR spectrum

**Figure S18.** Asbestinin 28,  $^{13}\text{C}$  NMR spectrum

**Figure S19.** Asbestinin 28, DEPT-135 spectrum

**Figure S20.** Asbestinin 28, COSY spectrum

**Figure S21.** Asbestinin 28, HSQC spectrum

**Figure S22.** Asbestinin 28, HMBC spectrum

**Figure S23.** Asbestinin 28, NOE spectra

**Figure S24.** Asbestinin 28, HR-ESITOFMS spectrum

**Table S1.** Viability of THP-1 human macrophages treated with different concentrations of diterpenes.

Figure S1. Briarellin T, <sup>1</sup>H NMR spectrum

Filename = JF1\_65\_11\_CDC13\_30\_7\_1!  
 Author = DELTA  
 Experiment = single\_pulse.exp  
 Sample\_Id = I3\_062\_003  
 Solvent = CHLOROFORM-D  
 Actual\_Start\_Time = 28-JUL-2015 14:01:55  
 Revision\_Time = 31-JUL-2015 07:40:50

Comment = Single Pulse Experiment  
 Data\_Format = 1D COMPLEX  
 Dim\_Size = 16384  
 X\_Domain = 1H  
 Dim\_Title = 1H  
 Dim\_Units = [ppm]  
 Dimensions = X  
 Site = Eclipse+ 400  
 Spectrometer = DELTA\_NMR

Field\_Strength = 9.389766[T] (400[MHz])  
 X\_Acq\_Duration = 2.7312128[s]  
 X\_Domain = 1H  
 X\_Freq = 399.78219838[MHz]  
 X\_Offset = 5[ppm]  
 X\_Points = 16384  
 X\_Prescans = 0  
 X\_Resolution = 0.36613771[Hz]  
 X\_Sweep = 5.99880024[kHz]  
 Clipped = FALSE  
 Scans = 32  
 Total\_Scans = 32

Relaxation\_Delay = 4[s]  
 Recvr\_Gain = 16  
 Temp\_Get = 21.9[dC]  
 X\_90\_Width = 9.81[us]  
 X\_Acq\_Time = 2.7312128[s]  
 X\_Angle = 45[deg]  
 X\_Pulse = 4.905[us]  
 Initial\_Wait = 1[s]  
 Unblank\_Time = 2[us]

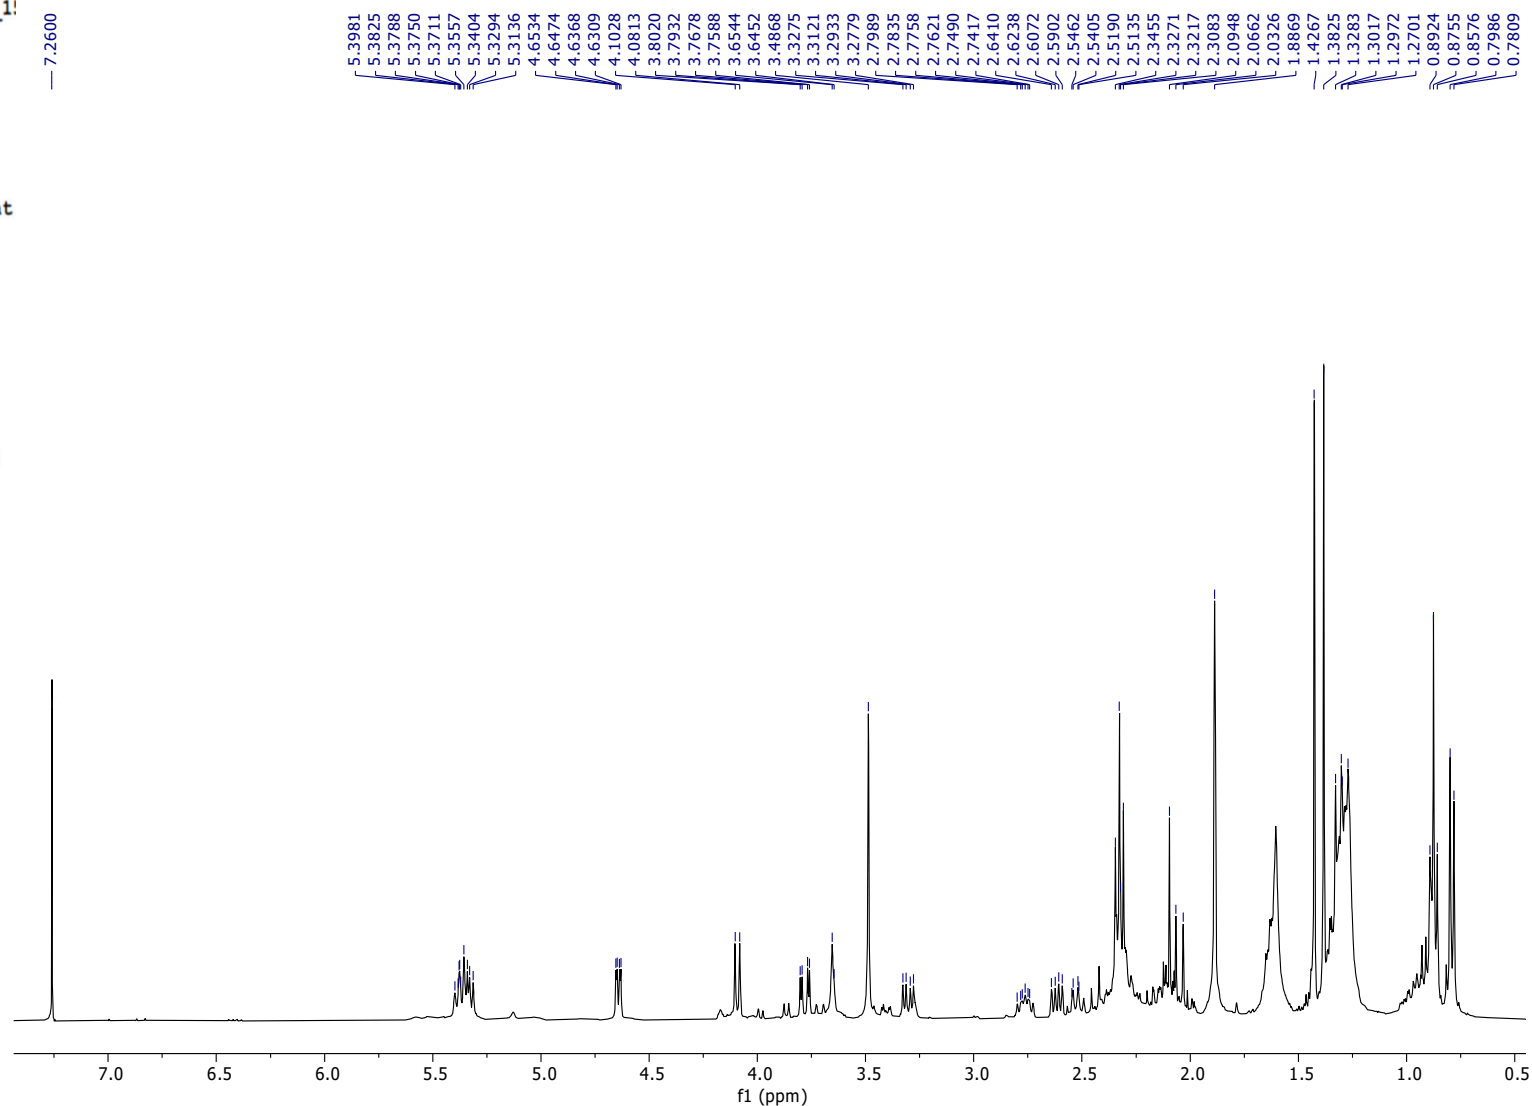

Figure S1. Briarellin T, <sup>1</sup>H NMR spectrum (expanded)

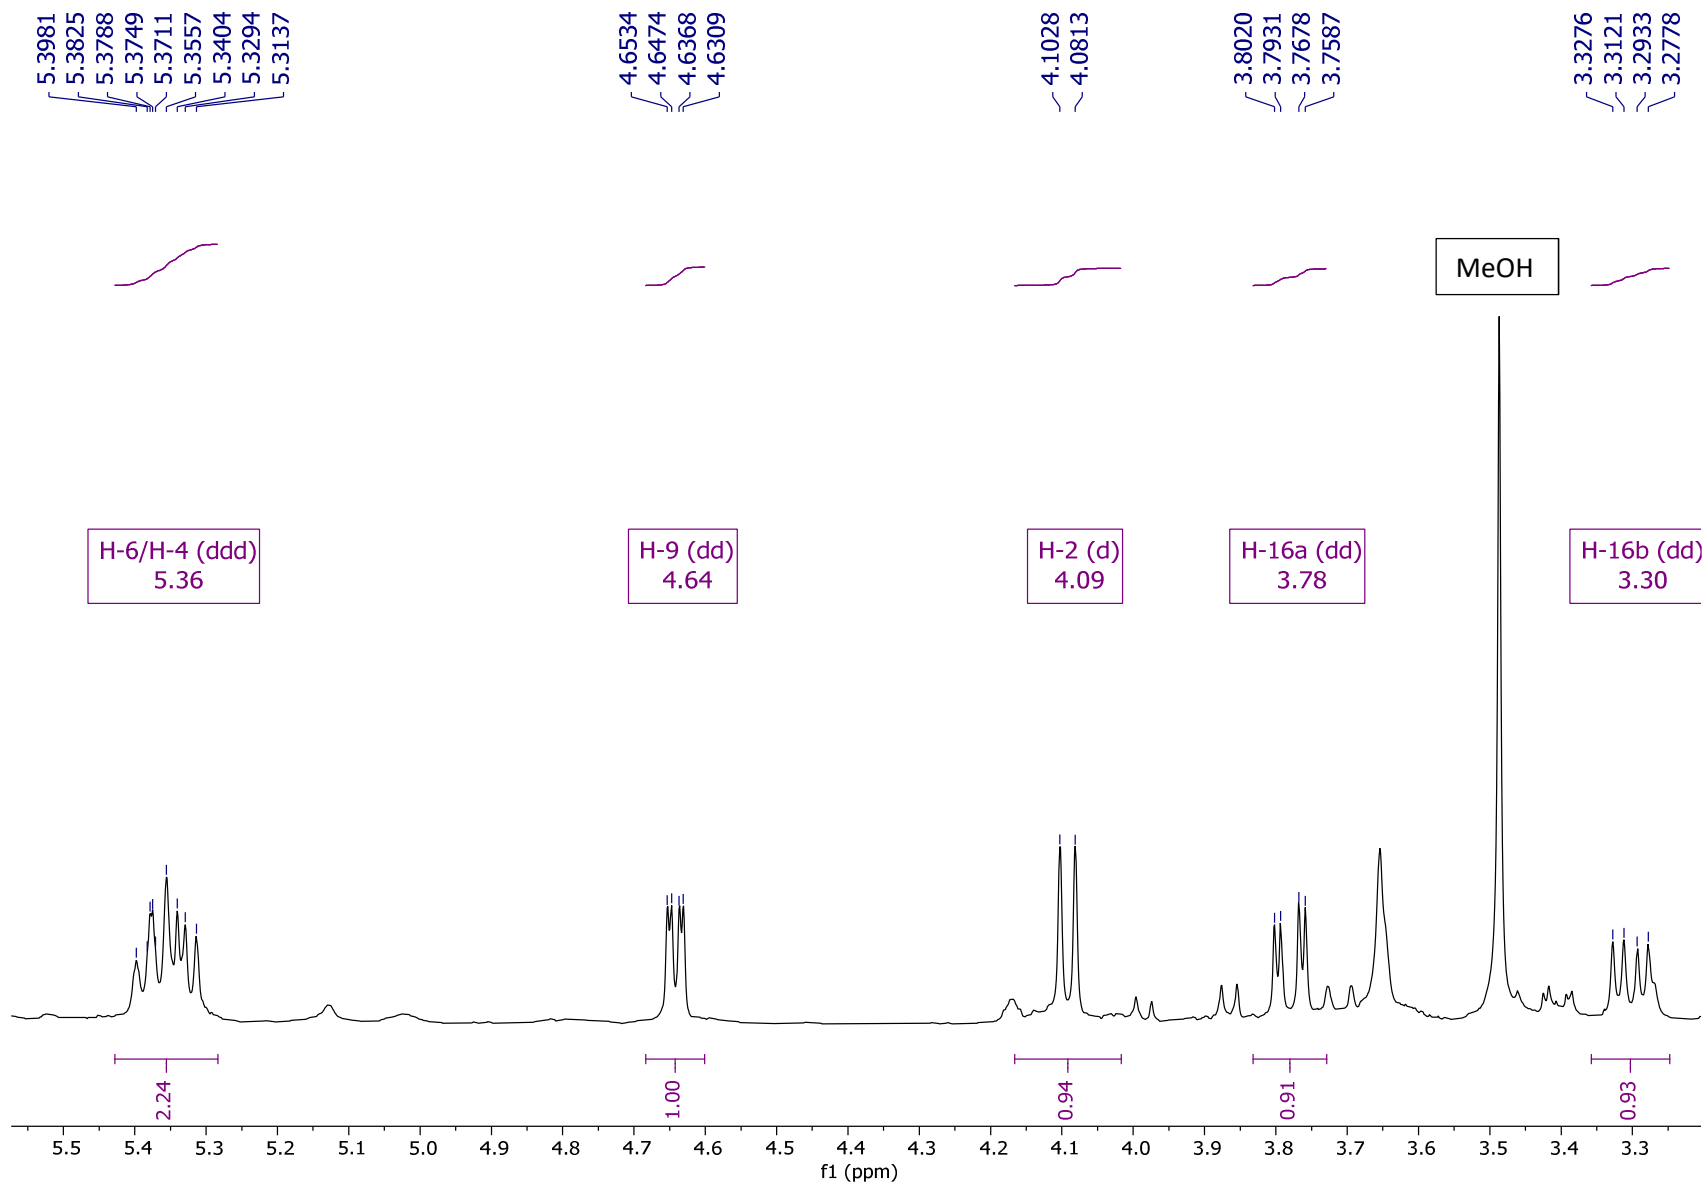

Figure S1. Briarellin T, <sup>1</sup>H NMR spectrum (expanded)

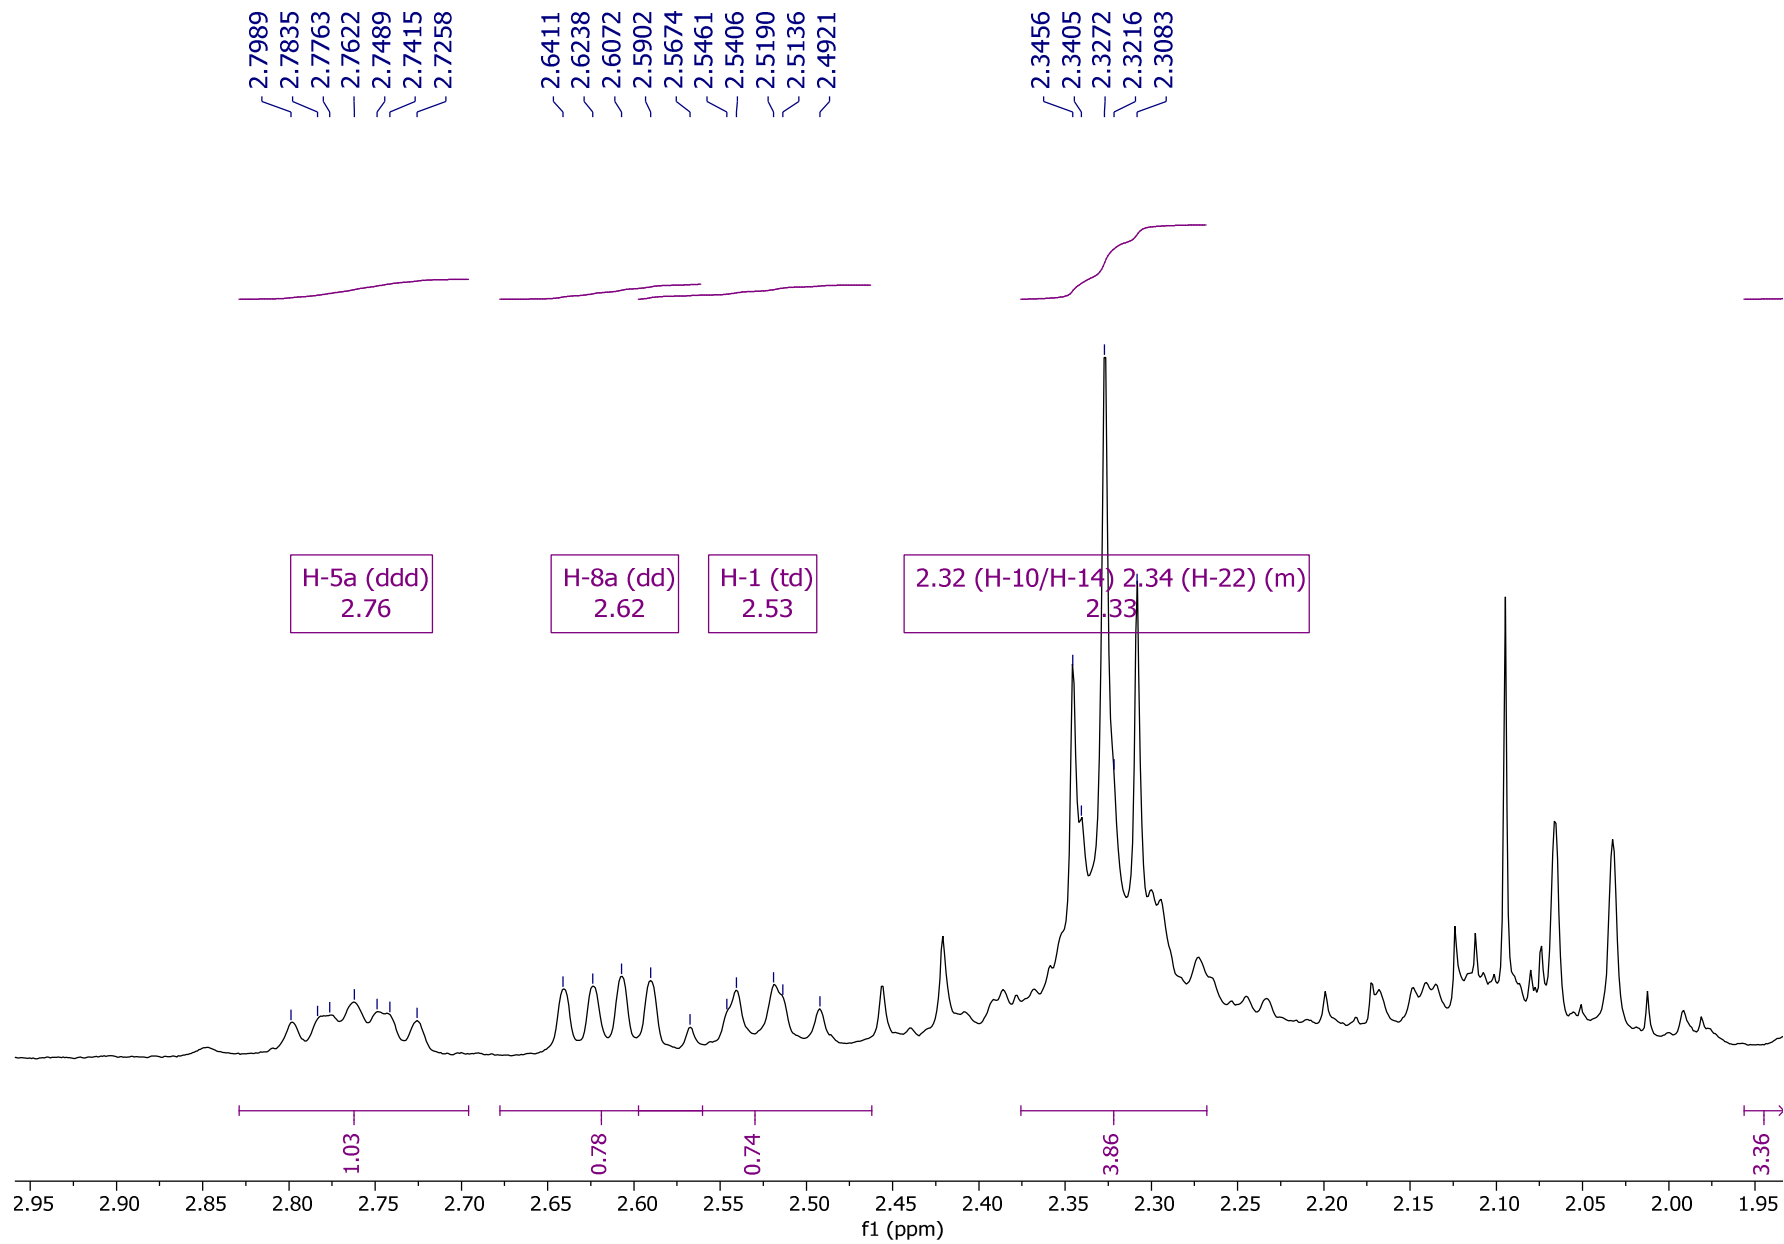

Figure S1. Briarellin T, <sup>1</sup>H NMR spectrum (expanded)

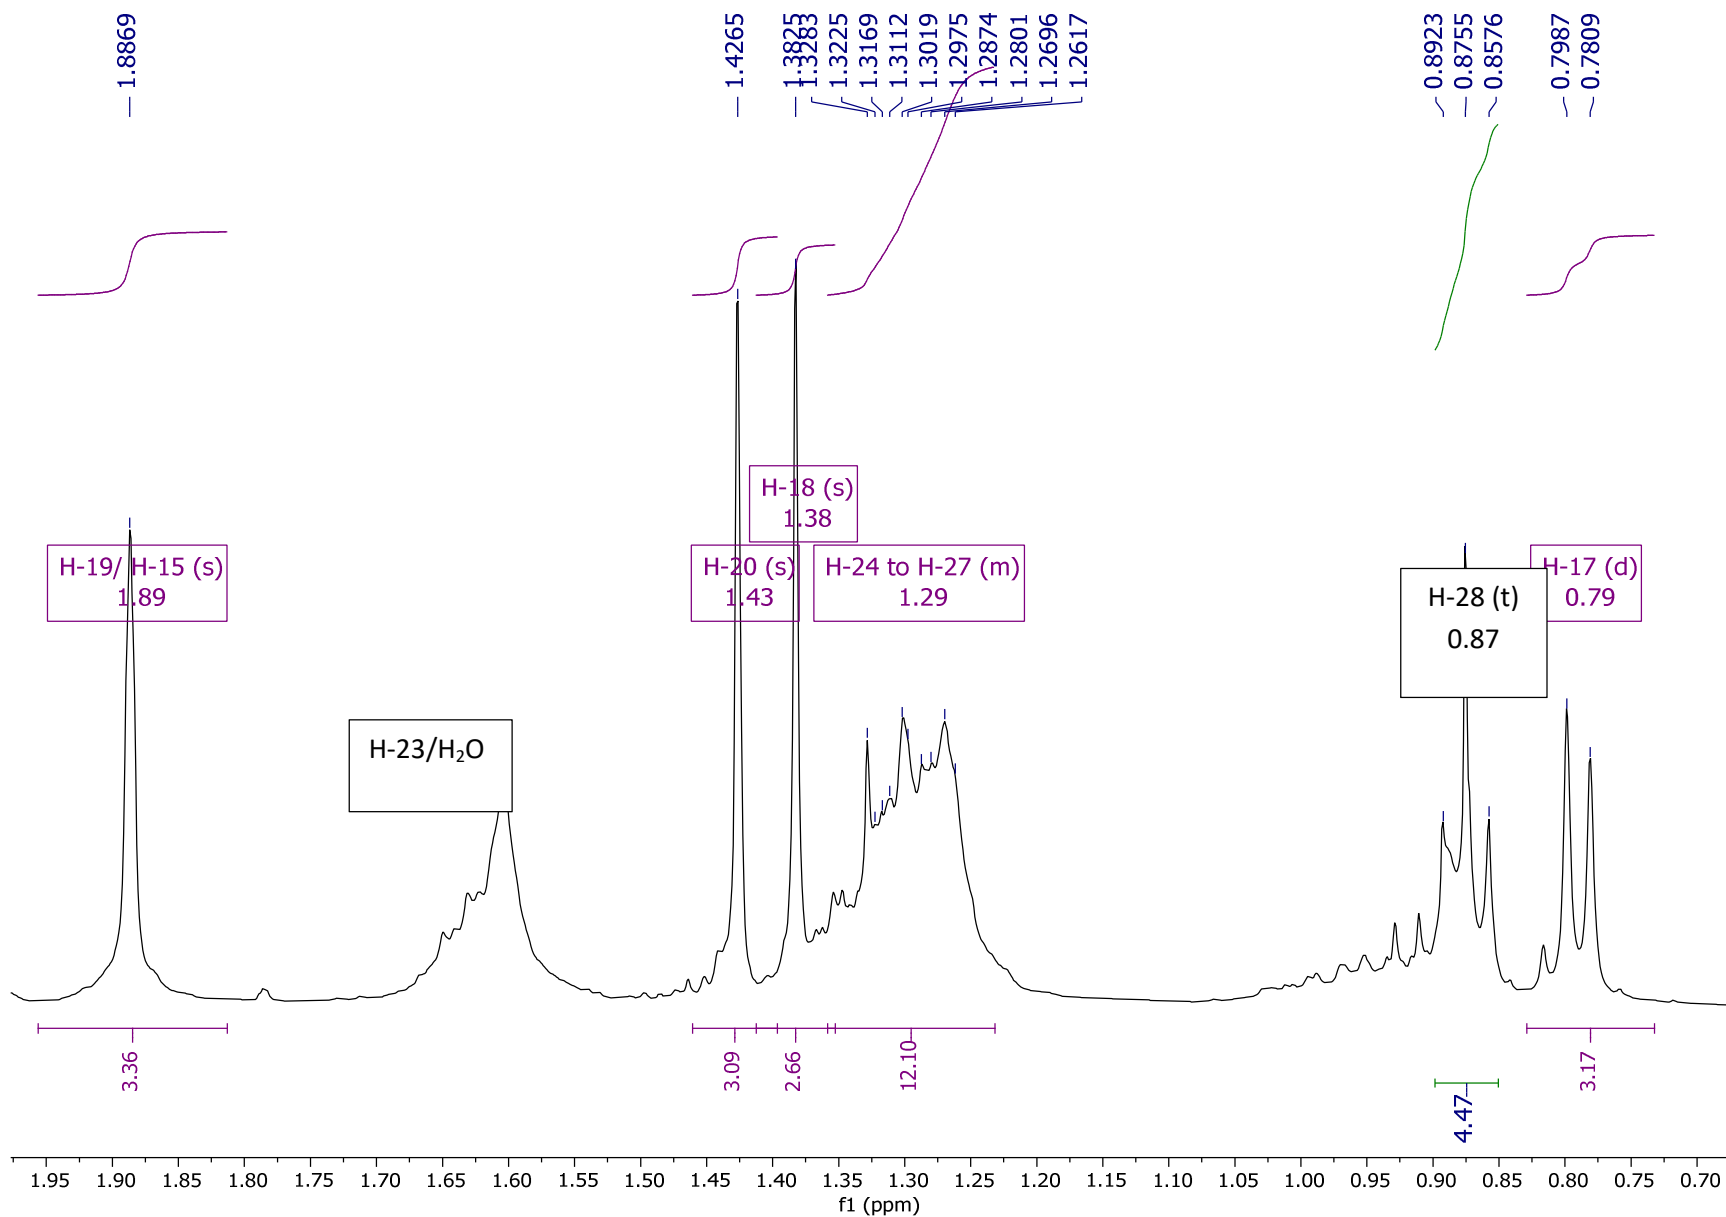

Figure S2. Briarellin T, <sup>13</sup>C NMR spectrum

Filename = JF1\_65\_11 en CDC13 29\_ — 214.33  
 Author = DELTA — 173.50  
 Experiment = single\_pulse\_dec  
 Sample\_Id = I3\_062\_003  
 Solvent = CHLOROFORM-D  
 Actual\_Start\_Time = 27-JUL-2015 18:34:35  
 Revision\_Time = 14-JAN-2020 18:03:09

Comment = Single Pulse with Broad  
 Data\_Format = 1D COMPLEX  
 Dim\_Size = 32768  
 X\_Domain = 13C  
 Dim\_Title = 13C  
 Dim\_Units = [ppm]  
 Dimensions = X  
 Site = Eclipse+ 400  
 Spectrometer = DELTA\_NMR

Field\_Strength = 9.389766[T] (400[MHz])  
 X\_Acq\_Duration = 1.3008896[s]  
 X\_Domain = 13C  
 X\_Freq = 100.52530333[MHz]  
 X\_Offset = 100[ppm]  
 X\_Points = 32768  
 X\_Prescans = 4  
 X\_Resolution = 0.76870474[Hz]  
 X\_Sweep = 25.18891688[kHz]  
 Irr\_Domain = 1H  
 Irr\_Freq = 399.78219838[MHz]  
 Irr\_Offset = 5[ppm]  
 Clipped = TRUE  
 Scans = 15000  
 Total\_Scans = 15000

Relaxation\_Delay = 1[s]  
 Recvr\_Gain = 26  
 Temp\_Get = 23.1[dC]  
 X\_90\_Width = 10[us]  
 X\_Acq\_Time = 1.3008896[s]  
 X\_Angle = 30[deg]  
 X\_Pulse = 3.33333333[us]  
 Initial\_Wait = 1[s]  
 Unblank\_Time = 2[us]

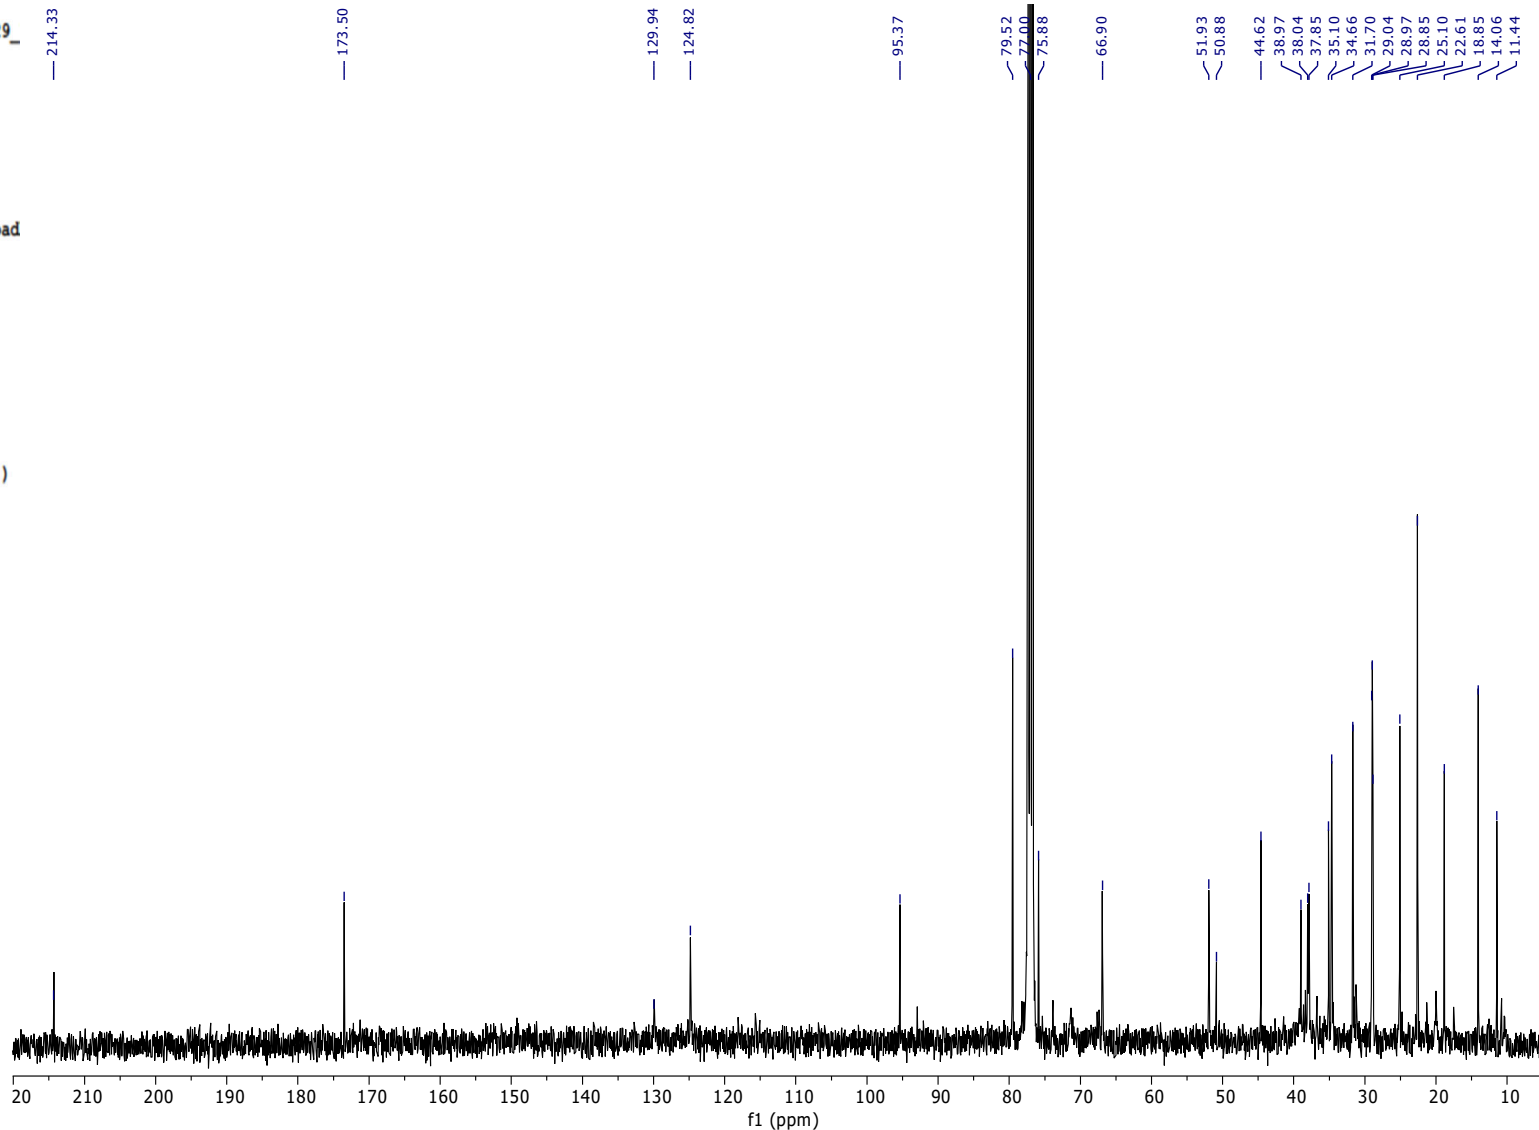

Figure S3. Briarellin T, DEPT-135 spectrum

```

Filename      = JF1_65_11 en CDC13 29 I3_062_003
Author        = DELTA
Experiment    = dept_dec.exp
Sample_Id     = I3_062_003
Solvent       = CHLOROFORM-D
Actual_Start_Time = 28-JUL-2015 04:10:36
Revision_Time = 14-JAN-2020 21:09:17

Comment       = DEPT with decoupling
Data_Format   = 1D COMPLEX
Dim_Size      = 32768
X_Domain      = 13C
Dim_Title     = 13C
Dim_Units     = [ppm]
Dimensions    = X
Site          = Eclipse+ 400
Spectrometer  = DELTA_NMR

Field_Strength = 9.389766[T] (400[MHz])
X_Acq_Duration = 1.3008896[s]
X_Domain       = 13C
X_Freq        = 100.52530333[MHz]
X_Offset      = 100[ppm]
X_Points      = 32768
X_Prescans    = 4
X_Resolution  = 0.76870474[Hz]
X_Sweep       = 25.18891688[kHz]
Irr_Domain    = 1H
Irr_Freq      = 399.78219838[MHz]
Irr_Offset    = 5[ppm]
Clipped       = FALSE
Scans         = 3937
Total_Scans   = 3937

Relaxation_Delay = 2[s]
Recvr_Gain      = 26
Temp_Get        = 21.9[dC]
X_Acq_Time     = 1.3008896[s]
X_Pulse        = 10[us]
Irr_Pulse      = 44.5[us]
Initial_Wait    = 1[s]
J_Constant     = 140[Hz]
Selection_Angle = 135[deg]
Selection_Pulse = 66.75[us]
Unblank_Time   = 2[us]
    
```

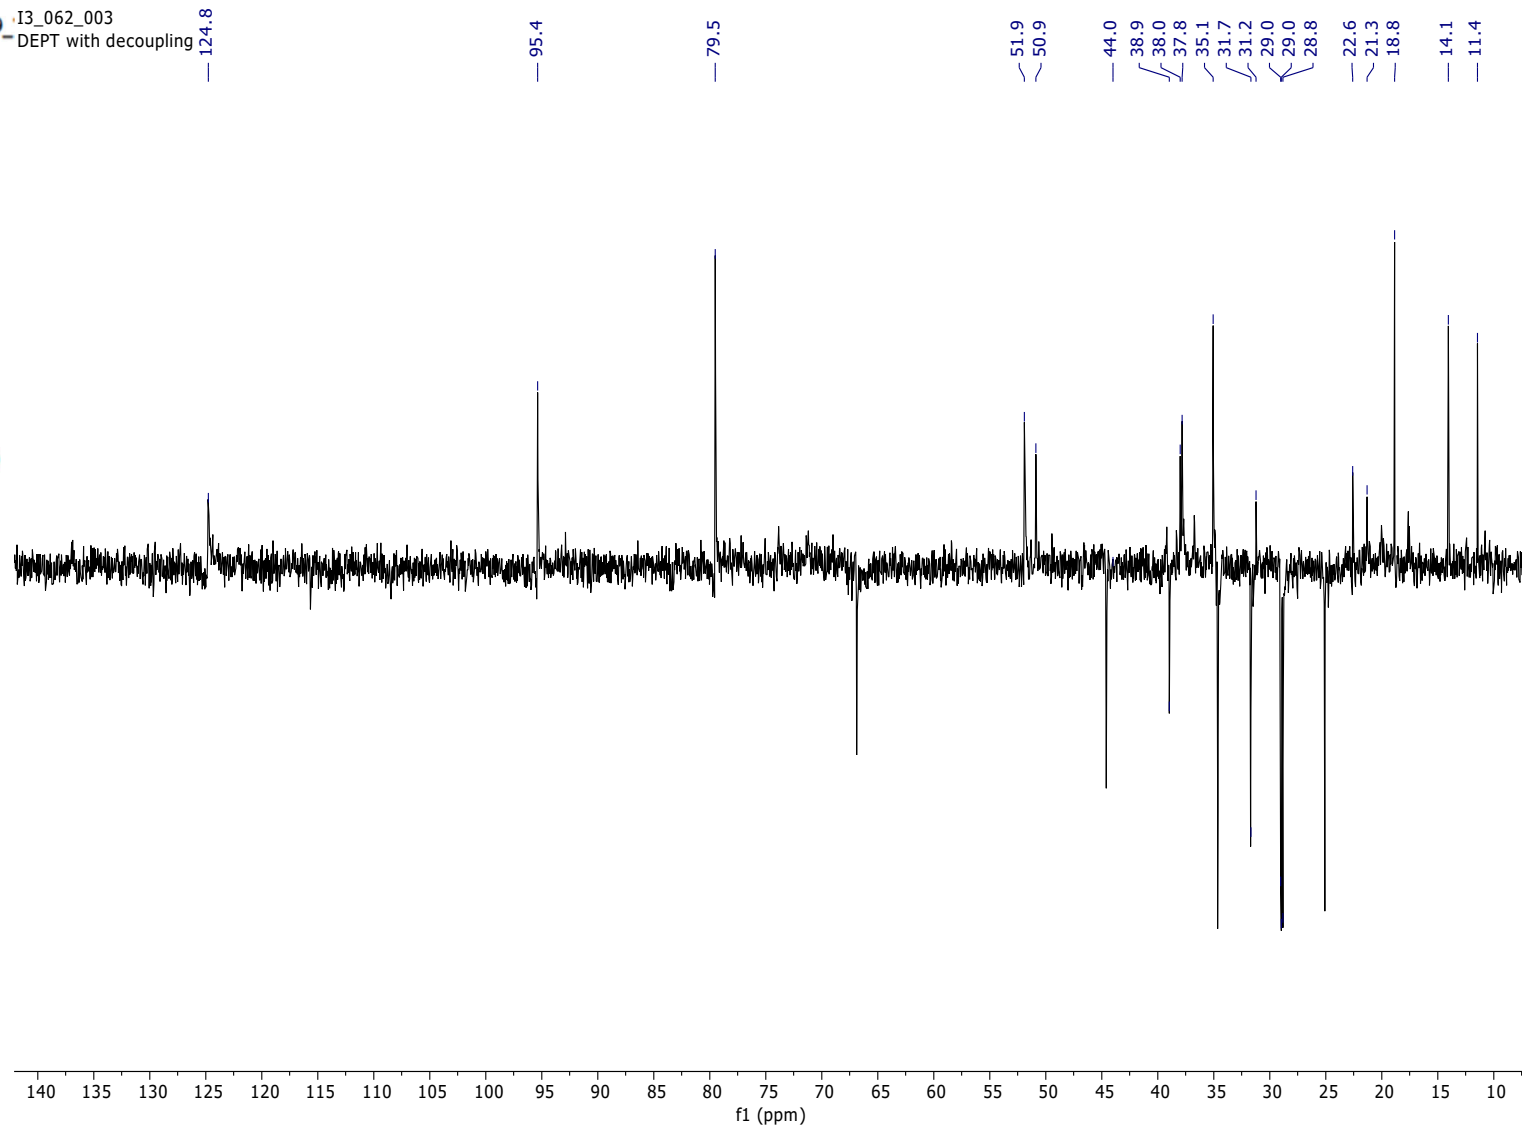



Figure S4. Briarellin T, COSY spectrum

Filename = JF1\_65\_11\_CDC13\_30\_7\_1  
Author = DELTA  
Experiment = dqf\_cosy.exp  
Sample\_Id = I3\_062\_003  
Solvent = CHLOROFORM-D  
Actual\_Start\_Time = 29-JUL-2015 05:54:39  
Revision\_Time = 23-OCT-2018 12:47:02

Comment = absolute value DQF COSY  
Data\_Format = 2D REAL REAL  
Dim\_Size = 512, 1024  
X\_Domain = 1H  
Y\_Domain = 1H  
Dim\_Title = 1H 1H  
Dim\_Units = [ppm] [ppm]  
Dimensions = X Y  
Site = Eclipse+ 400  
Spectrometer = DELTA\_NMR

Field\_Strength = 9.389766[T] (400[MHz])  
X\_Acq\_Duration = 0.1133568[s]  
X\_Domain = 1H  
X\_Freq = 399.78219838[MHz]  
X\_Offset = 4.68335[ppm]  
X\_Points = 512  
X\_Prescans = 4  
X\_Resolution = 8.8217028[Hz]  
X\_Sweep = 4.51671183[kHz]  
Y\_Domain = 1H  
Y\_Freq = 399.78219838[MHz]  
Y\_Offset = 4.68335[ppm]  
Y\_Points = 256  
Y\_Prescans = 0  
Y\_Resolution = 17.6434056[Hz]  
Y\_Sweep = 4.51671183[kHz]  
Clipped = FALSE  
Scans = 16  
Total\_Scans = 4096

Relaxation\_Delay = 1.5[s]  
Recvr\_Gain = 15  
Temp\_Get = 21.6[dC]  
X\_Acq\_Time = 0.1133568[s]  
X\_Pulse = 9.81[us]  
Y\_Acq\_Time = 56.6784[ms]  
Initial\_Wait = 1[s]  
T1 = 1[us]  
Unblank\_Time = 2[us]

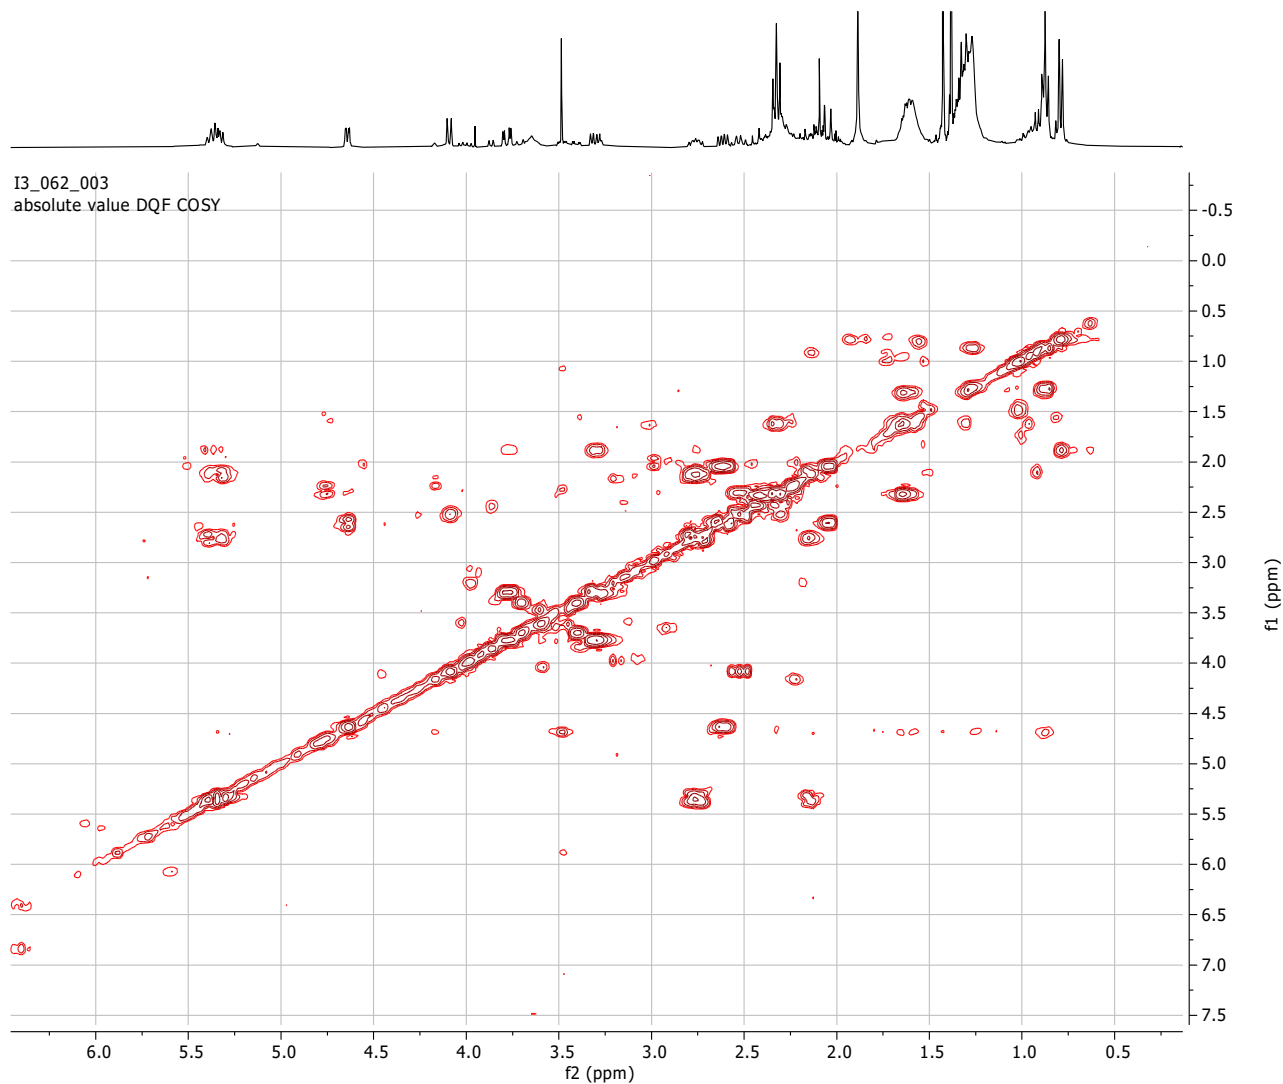

Figure S5. Briarellin T, HSQC spectrum

Filename = JF1\_65\_11\_CDC13\_29\_7\_1!  
 Author = DELTA  
 Experiment = multiplicity\_hsq  
 Sample\_Id = I3\_062\_003  
 Solvent = CHLOROFORM-D  
 Actual\_Start\_Time = 28-JUL-2015 10:56:48  
 Revision\_Time = 14-JAN-2020 21:23:24

Comment = Multiplicity HSQC  
 Data\_Format = 2D COMPLEX COMPLEX  
 Dim\_Size = 2048, 324  
 X\_Domain = 13C  
 Y\_Domain = 13C  
 Dim\_Title = 13C 13C  
 Dim\_Units = [ppm] [ppm]  
 Dimensions = X Y  
 Site = Eclipse+ 400  
 Spectrometer = DELTA\_NMR

Field\_Strength = 9.389766[T] (400[MHz])  
 X\_Acq\_Duration = 66.9696[ms]  
 X\_Domain = 13C  
 X\_Freq = 100.52530333[MHz]  
 X\_Offset = 68.30581[ppm]  
 X\_Points = 1024  
 X\_Prescans = 4  
 X\_Resolution = 14.93214832[Hz]  
 X\_Sweep = 15.29051988[kHz]  
 Y\_Domain = 13C  
 Y\_Freq = 100.52530333[MHz]  
 Y\_Offset = 100[ppm]  
 Y\_Points = 162  
 Y\_Prescans = 0  
 Y\_Resolution = 155.87978551[Hz]  
 Y\_Sweep = 25.25252525[kHz]  
 Clipped = FALSE  
 Scans = 16  
 Total\_Scans = 2579

Relaxation\_Delay = 2[s]  
 Recvr\_Gain = 27  
 Temp\_Get = 22.1[dC]  
 X\_Acq\_Time = 66.9696[ms]  
 X\_Pulse = 10[us]  
 Y\_Acq\_Time = 10.1376[ms]  
 Y\_Pulse = 10[us]  
 Enhance\_Temp = 12  
 Enhancement = 1/6J  
 Grad\_1 = 1[ms]  
 Grad\_1\_Amp = 4[pnt]  
 Grad\_1\_Value = 4[pnt\*ms]  
 Grad\_2 = 1[ms]  
 Grad\_2\_Amp = -1[pnt]  
 Grad\_2\_Value = -1[pnt\*ms]  
 Grad\_3 = 1[ms]  
 Grad\_3\_Amp = 1[pnt]  
 Grad\_Recover = 0.1[ms]  
 Grad\_Selection = 13C = 4:1  
 Grad\_Shape = square  
 Grad\_Type = 0  
 Initial\_Wait = 1[s]  
 J\_Constant = 140[Hz]  
 T1 = 1[us]  
 Tau = 0.5952381[ms]

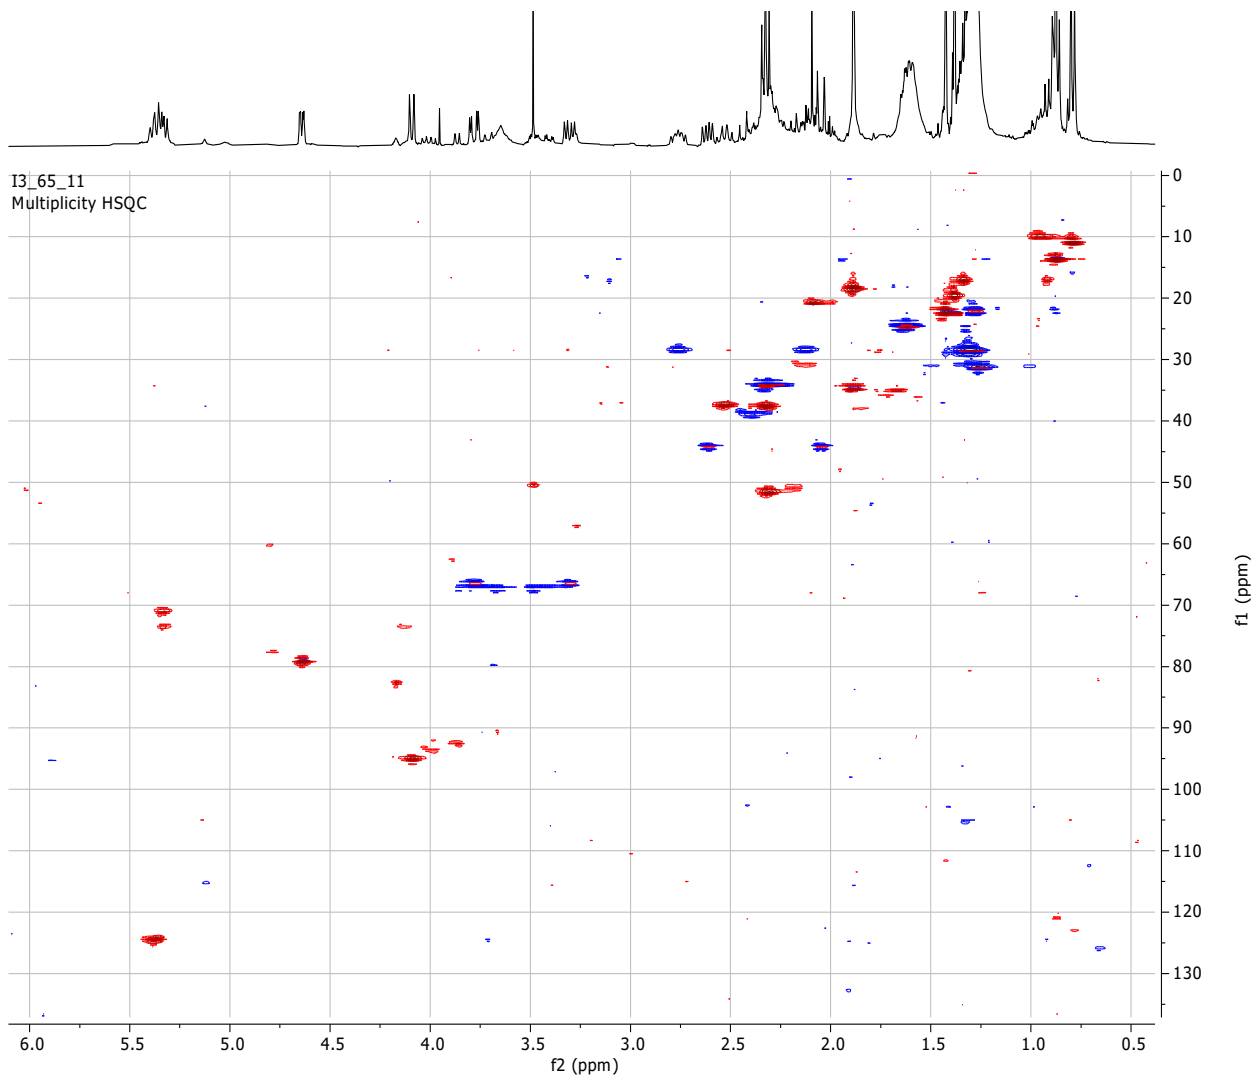

Figure S6. Briarellin T, HMBC spectrum

Filename = JF1\_65\_11\_CDCl3\_30\_7\_1!  
Author = DELTA  
Experiment = hmhc\_pfg\_s.exp  
Sample\_Id = I3\_062\_003  
Solvent = CHLOROFORM-D  
Actual\_Start\_Time = 29-JUL-2015 00:40:13  
Revision\_Time = 31-JUL-2015 07:55:57

Comment = gradient enhanced HMBC  
Data\_Format = 2D REAL REAL  
Dim\_Size = 1024, 512  
X\_Domain = 1H  
Y\_Domain = 13C  
Dim\_Title = 1H 13C  
Dim\_Units = [ppm] [ppm]  
Dimensions = X Y  
Site = Eclipse+ 400  
Spectrometer = DELTA\_NMR

Field\_Strength = 9.389766[T] (400[MHz])  
X\_Acq\_Duration = 0.2267136[s]  
X\_Domain = 1H  
X\_Freq = 399.78219838[MHz]  
X\_Offset = 4.68335[ppm]  
X\_Points = 1024  
X\_Prescans = 4  
X\_Resolution = 4.4108514[Hz]  
X\_Sweep = 4.51671183[kHz]  
Y\_Domain = 13C  
Y\_Freq = 100.52530333[MHz]  
Y\_Offset = 100[ppm]  
Y\_Points = 256  
Y\_Prescans = 0  
Y\_Resolution = 98.64267677[Hz]  
Y\_Sweep = 25.25252525[kHz]  
Clipped = FALSE  
Scans = 32  
Total\_Scans = 8192

Relaxation\_Delay = 2[s]  
Recvr\_Gain = 30  
Temp\_Get = 21.3[dC]  
X\_Acq\_Time = 0.2267136[s]  
X\_Pulse = 9.81[us]  
Y\_Acq\_Time = 10.1376[ms]  
Y\_Pulse = 12[us]  
Grad\_1 = 1[ms]  
Grad\_1\_Amp = 10[pnt]  
Grad\_1\_Value = 10[pnt\*ms]  
Grad\_2 = 1[ms]  
Grad\_2\_Amp = 10[pnt]  
Grad\_2\_Value = 10[pnt\*ms]  
Grad\_3 = 1[ms]  
Grad\_3\_Amp = 5[pnt]  
Grad\_3\_Value = 5[pnt\*ms]  
Grad\_Recover = 0.2[ms]  
Grad\_Selection = 13C = 2:2:1  
Grad\_Shape = square  
Grad\_Type = 0  
Initial\_Wait = 1[s]  
J\_Constant = 140[Hz]  
Long\_Range\_J = 8[Hz]  
T1 = 1[us]  
Unblank\_Time = 2[us]

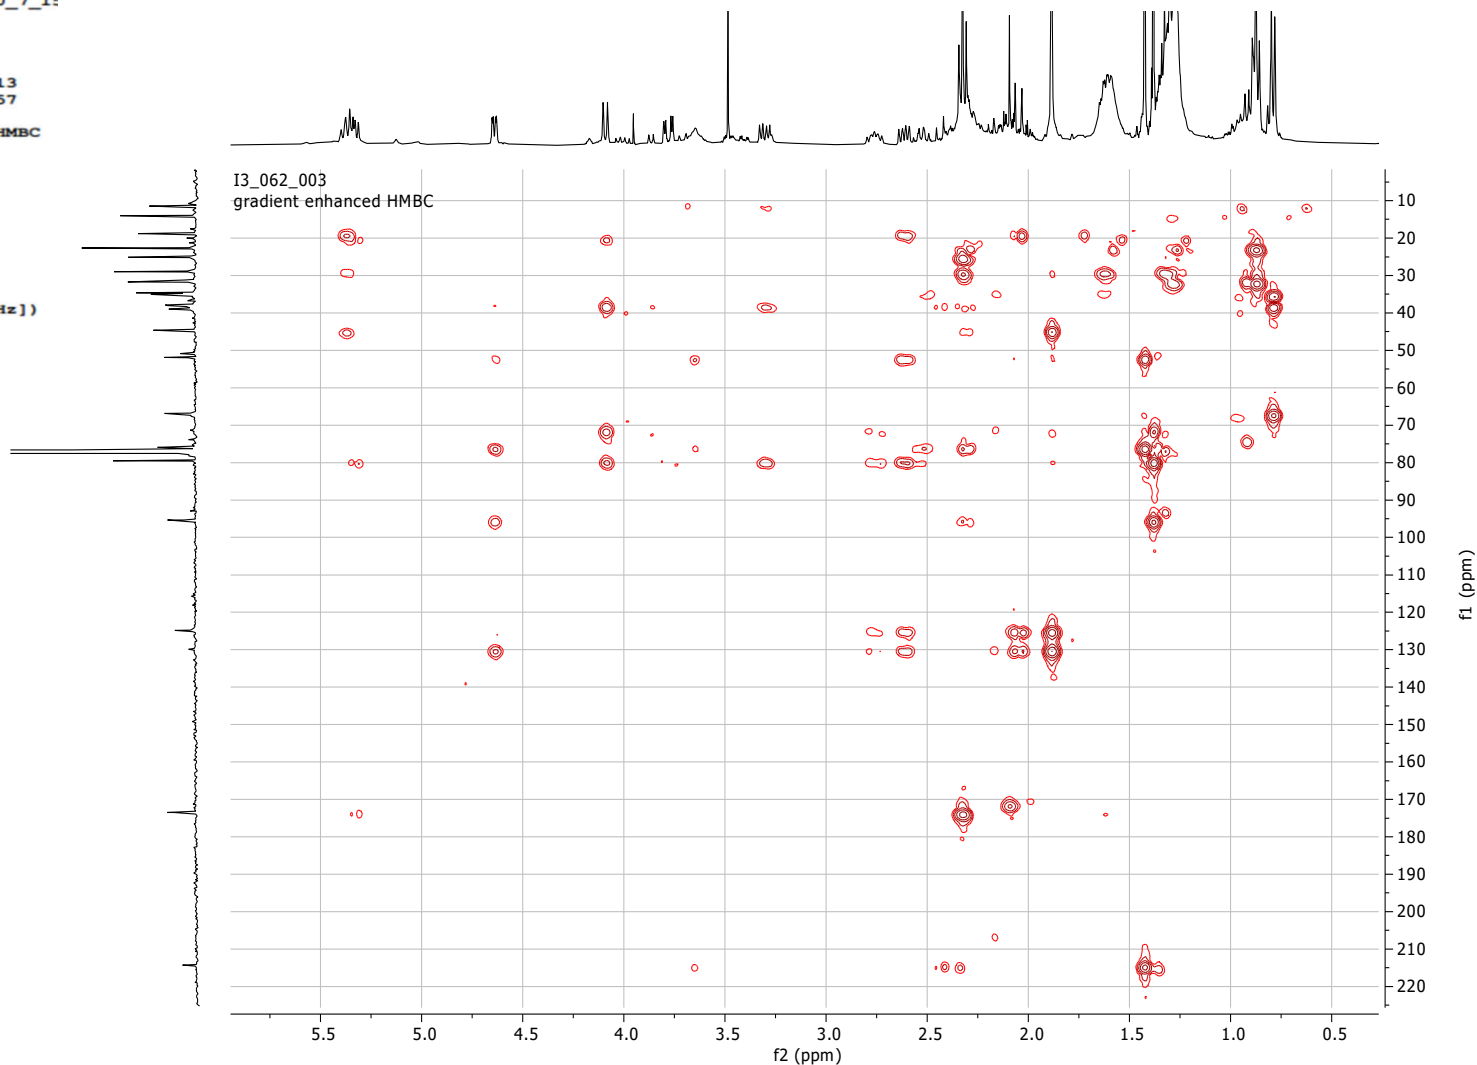

Figure S7. Briarellin T, NOE spectra

Irradiation of H-17

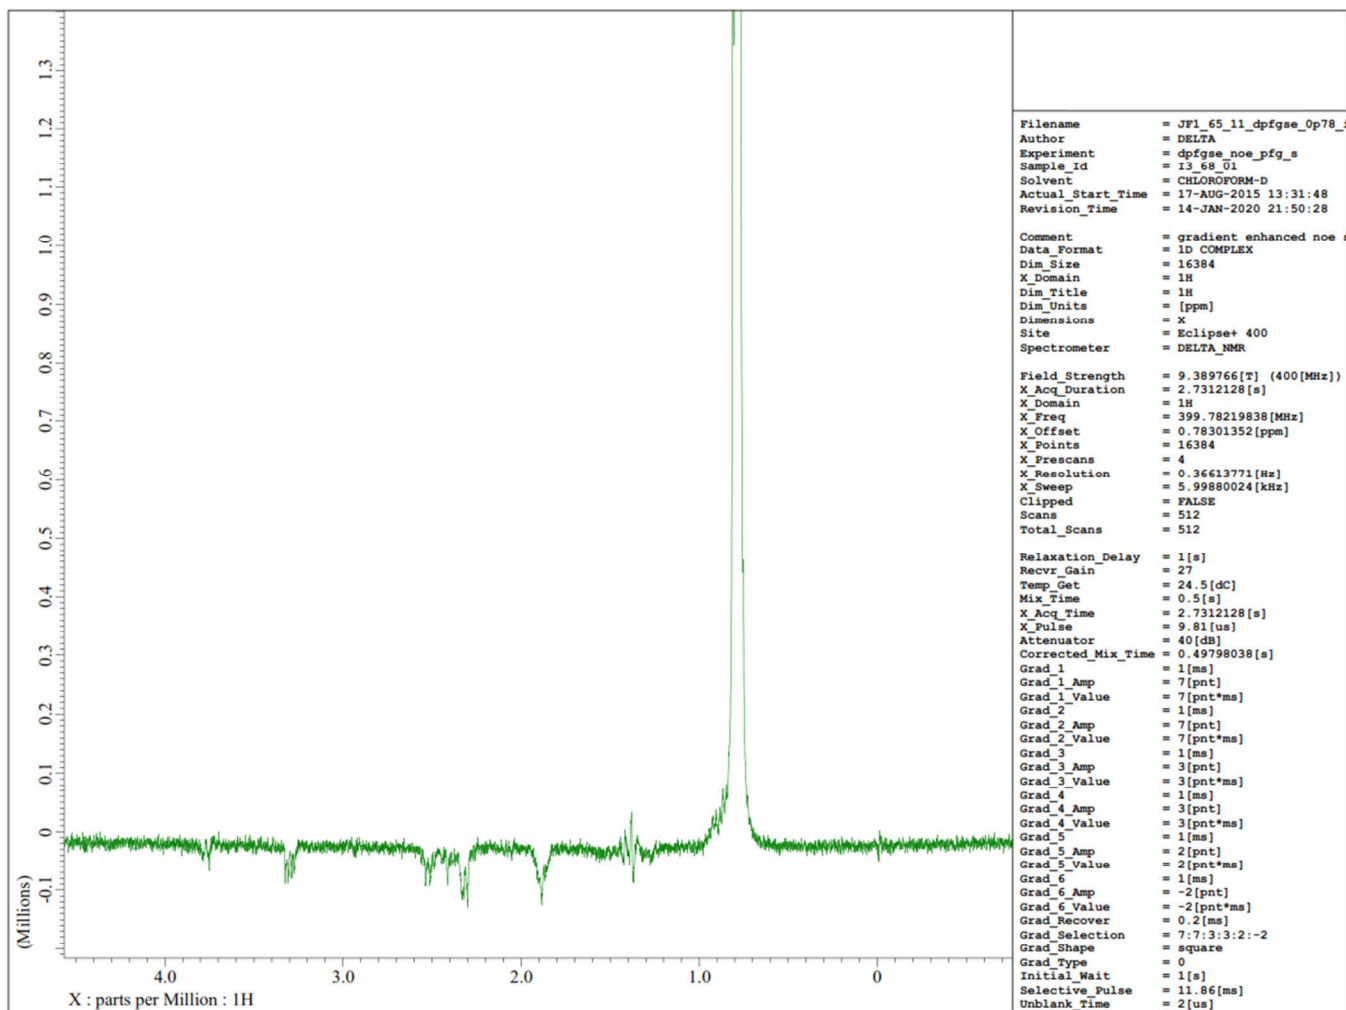

Figure S7. Briarellin T, NOE spectra

Irradiation of H-18

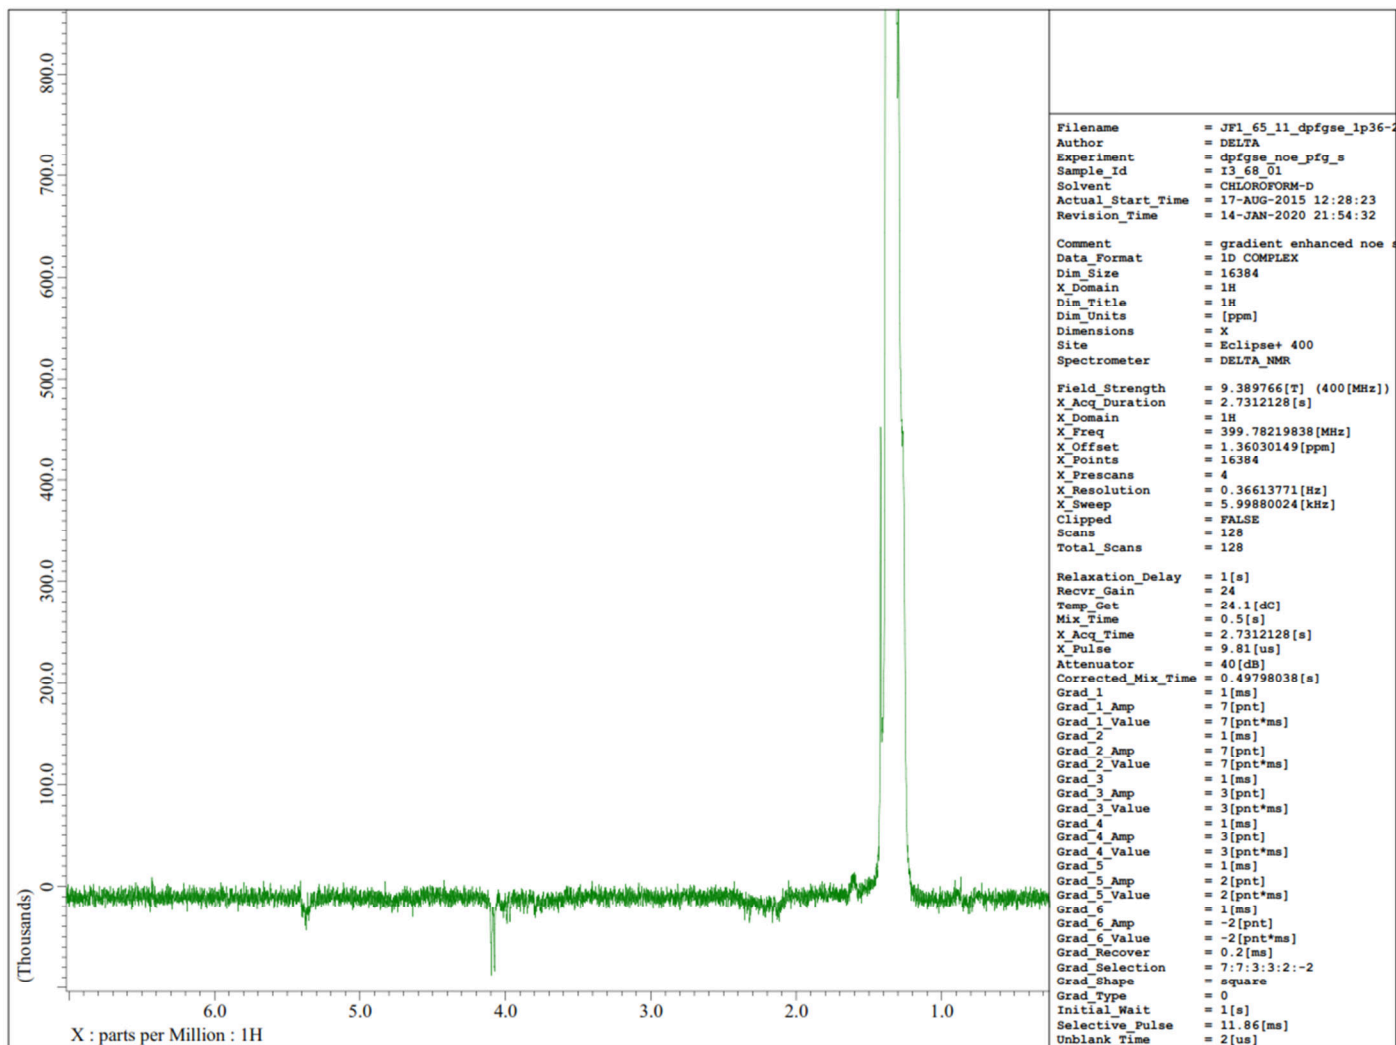

Figure S7. Briarellin T, NOE spectra

Irradiation of H-20

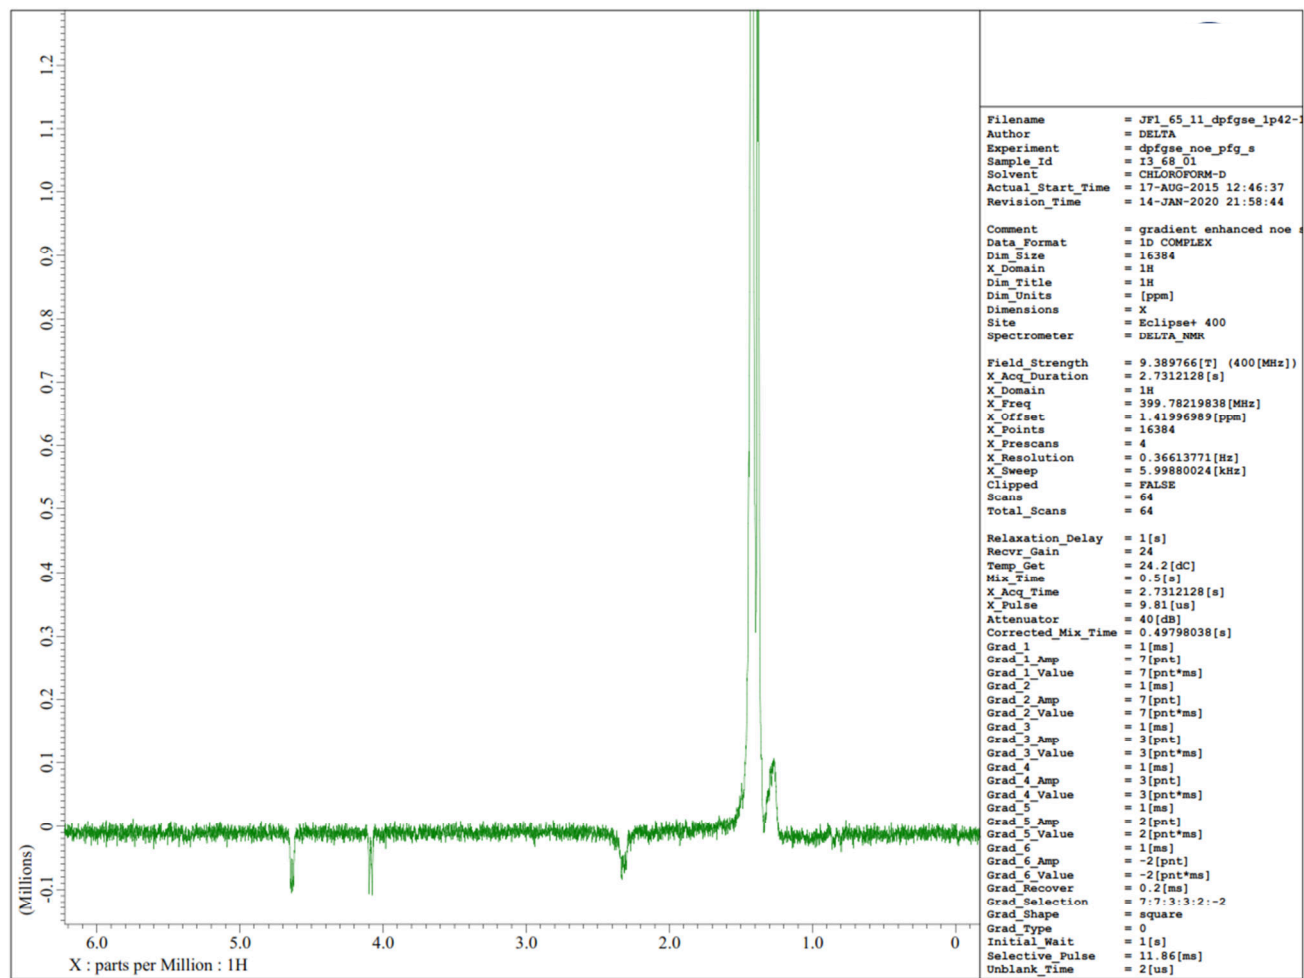

Figure S8. Briarellin T, HR-ESITOFMS spectrum

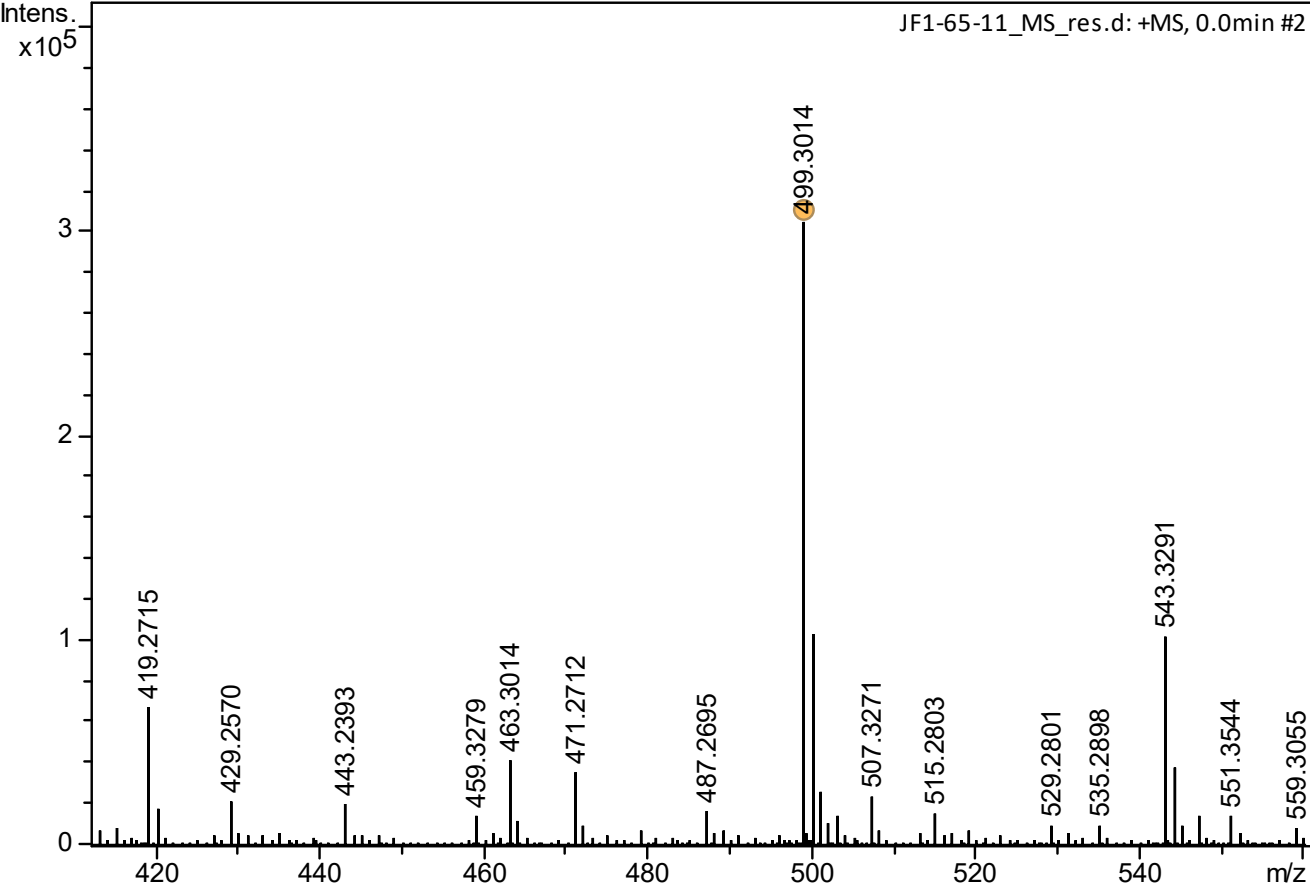

Figure S9. Asbestinin 27, <sup>1</sup>H NMR spectrum

Filename = JF1\_65\_05-4\_proton OK.j  
Author = DELTA  
Experiment = single\_pulse.exp  
Sample\_Id = I3\_68\_02  
Solvent = CHLOROFORM-D  
Actual\_Start\_Time = 17-AUG-2015 15:51:50  
Revision\_Time = 19-AUG-2015 15:41:04

Comment = Single Pulse Experiment  
Data\_Format = 1D COMPLEX  
Dim\_Size = 16384  
X\_Domain = 1H  
Dim\_Title = 1H  
Dim\_Units = [ppm]  
Dimensions = X  
Site = Eclipse+ 400  
Spectrometer = DELTA\_NMR

Field\_Strength = 9.389766[T] (400[MHz])  
X\_Acq\_Duration = 2.7312128[s]  
X\_Domain = 1H  
X\_Freq = 399.78219838[MHz]  
X\_Offset = 5[ppm]  
X\_Points = 16384  
X\_Prescans = 0  
X\_Resolution = 0.36613771[Hz]  
X\_Sweep = 5.99880024[kHz]  
Clipped = FALSE  
Scans = 16  
Total\_Scans = 16

Relaxation\_Delay = 4[s]  
Recvr\_Gain = 17  
Temp\_Get = 25[dC]  
X\_90\_Width = 9.81[us]  
X\_Acq\_Time = 2.7312128[s]  
X\_Angle = 45[deg]  
X\_Pulse = 4.905[us]  
Initial\_Wait = 1[s]  
Unblank\_Time = 2[us]

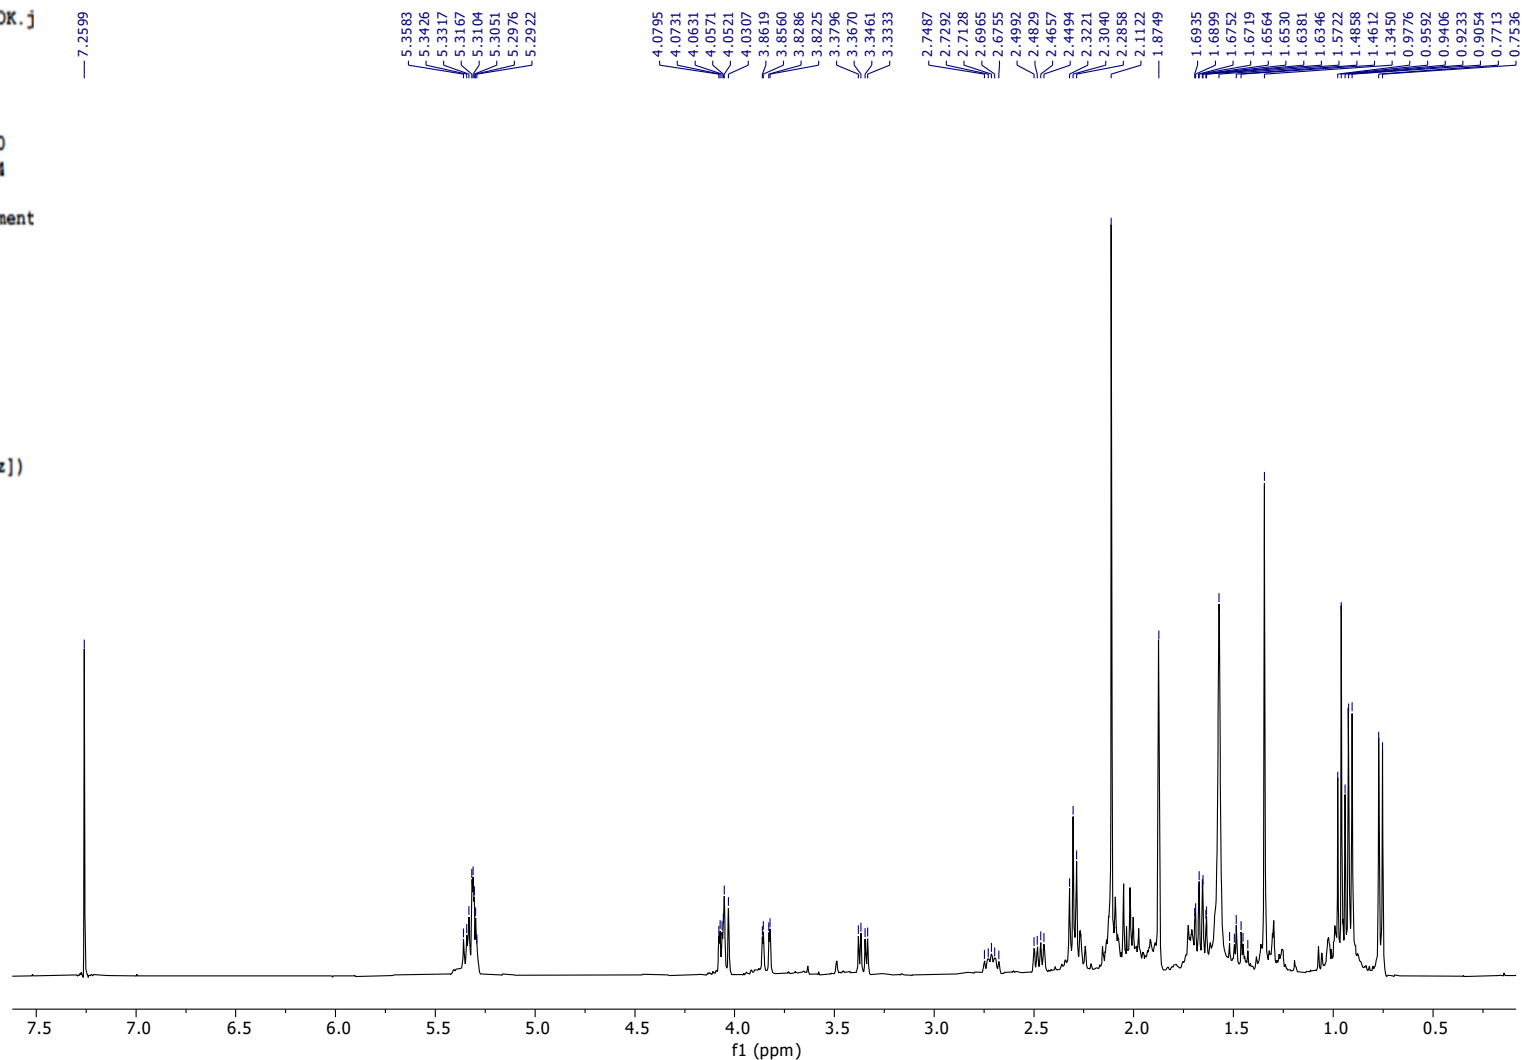



Figure S9. Asbestinin 27, <sup>1</sup>H NMR spectrum (expanded)

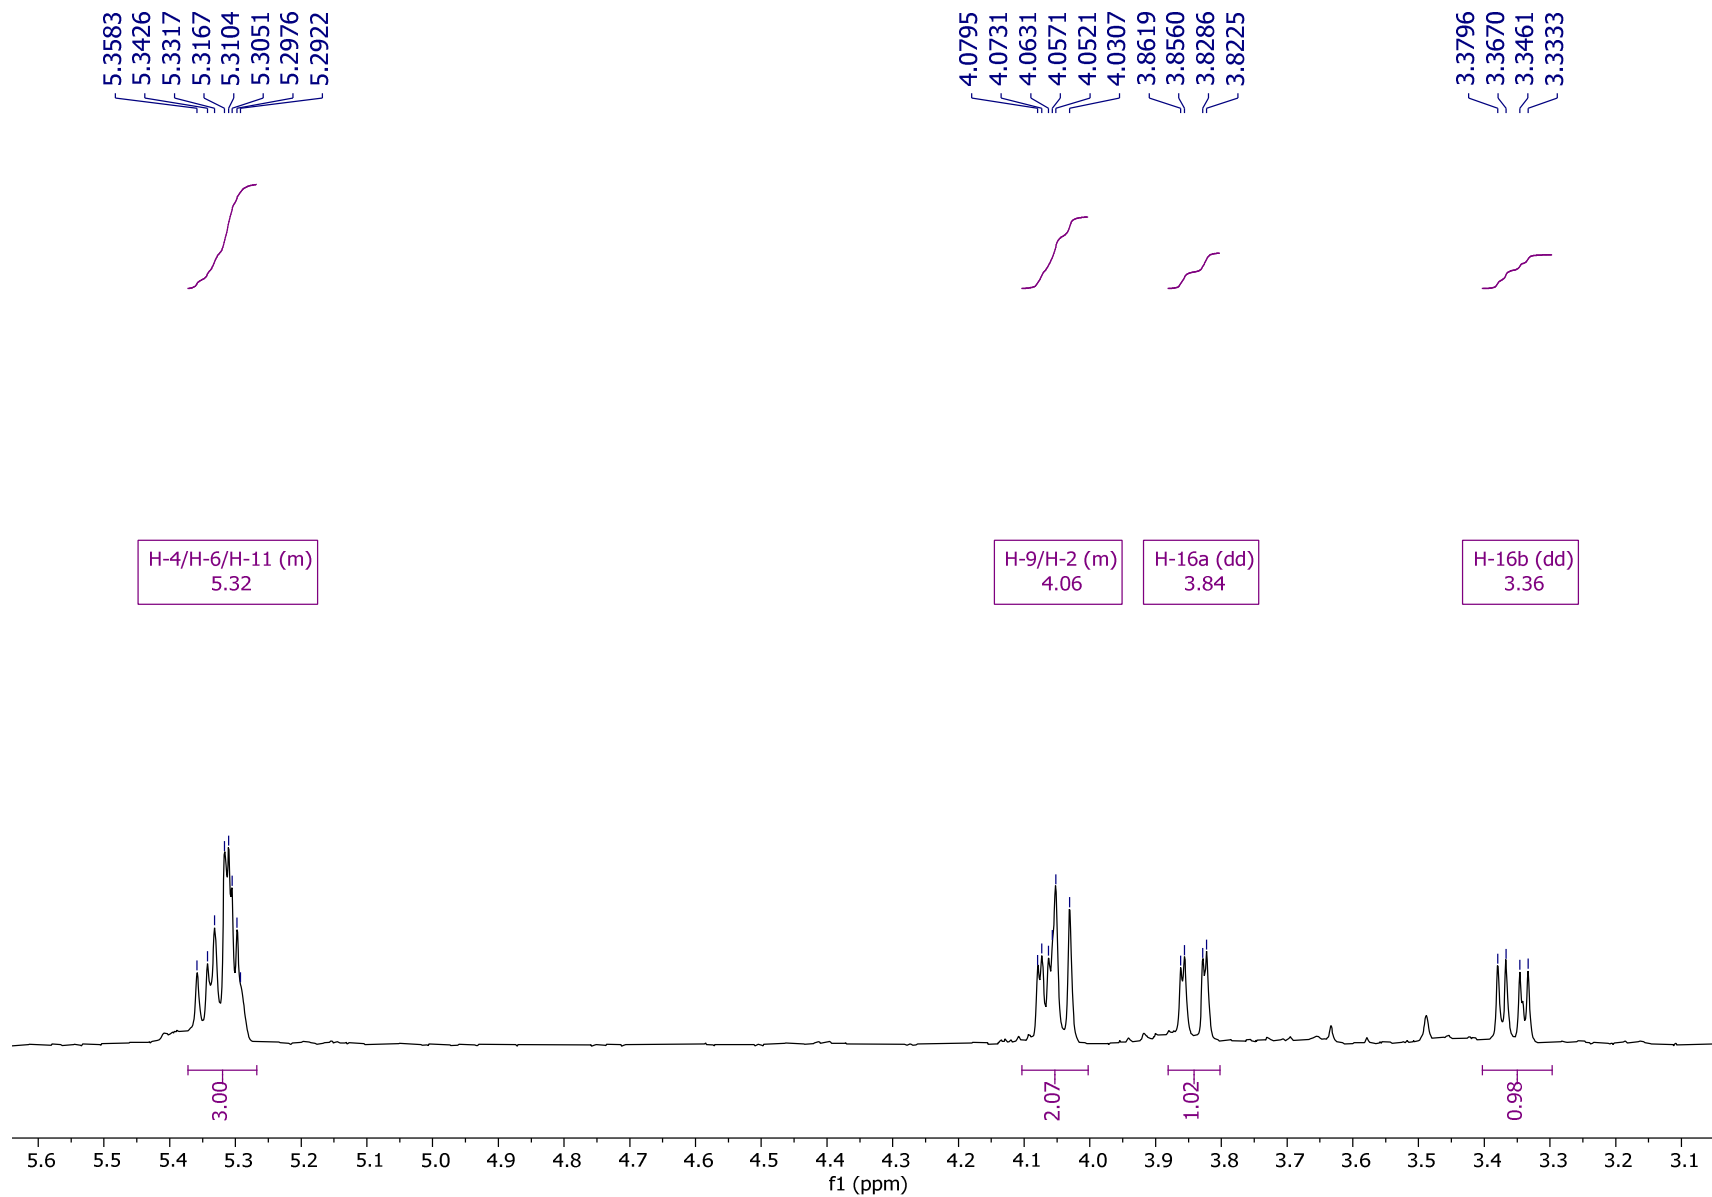

Figure S9. Asbestinin 27, <sup>1</sup>H NMR spectrum (expanded)

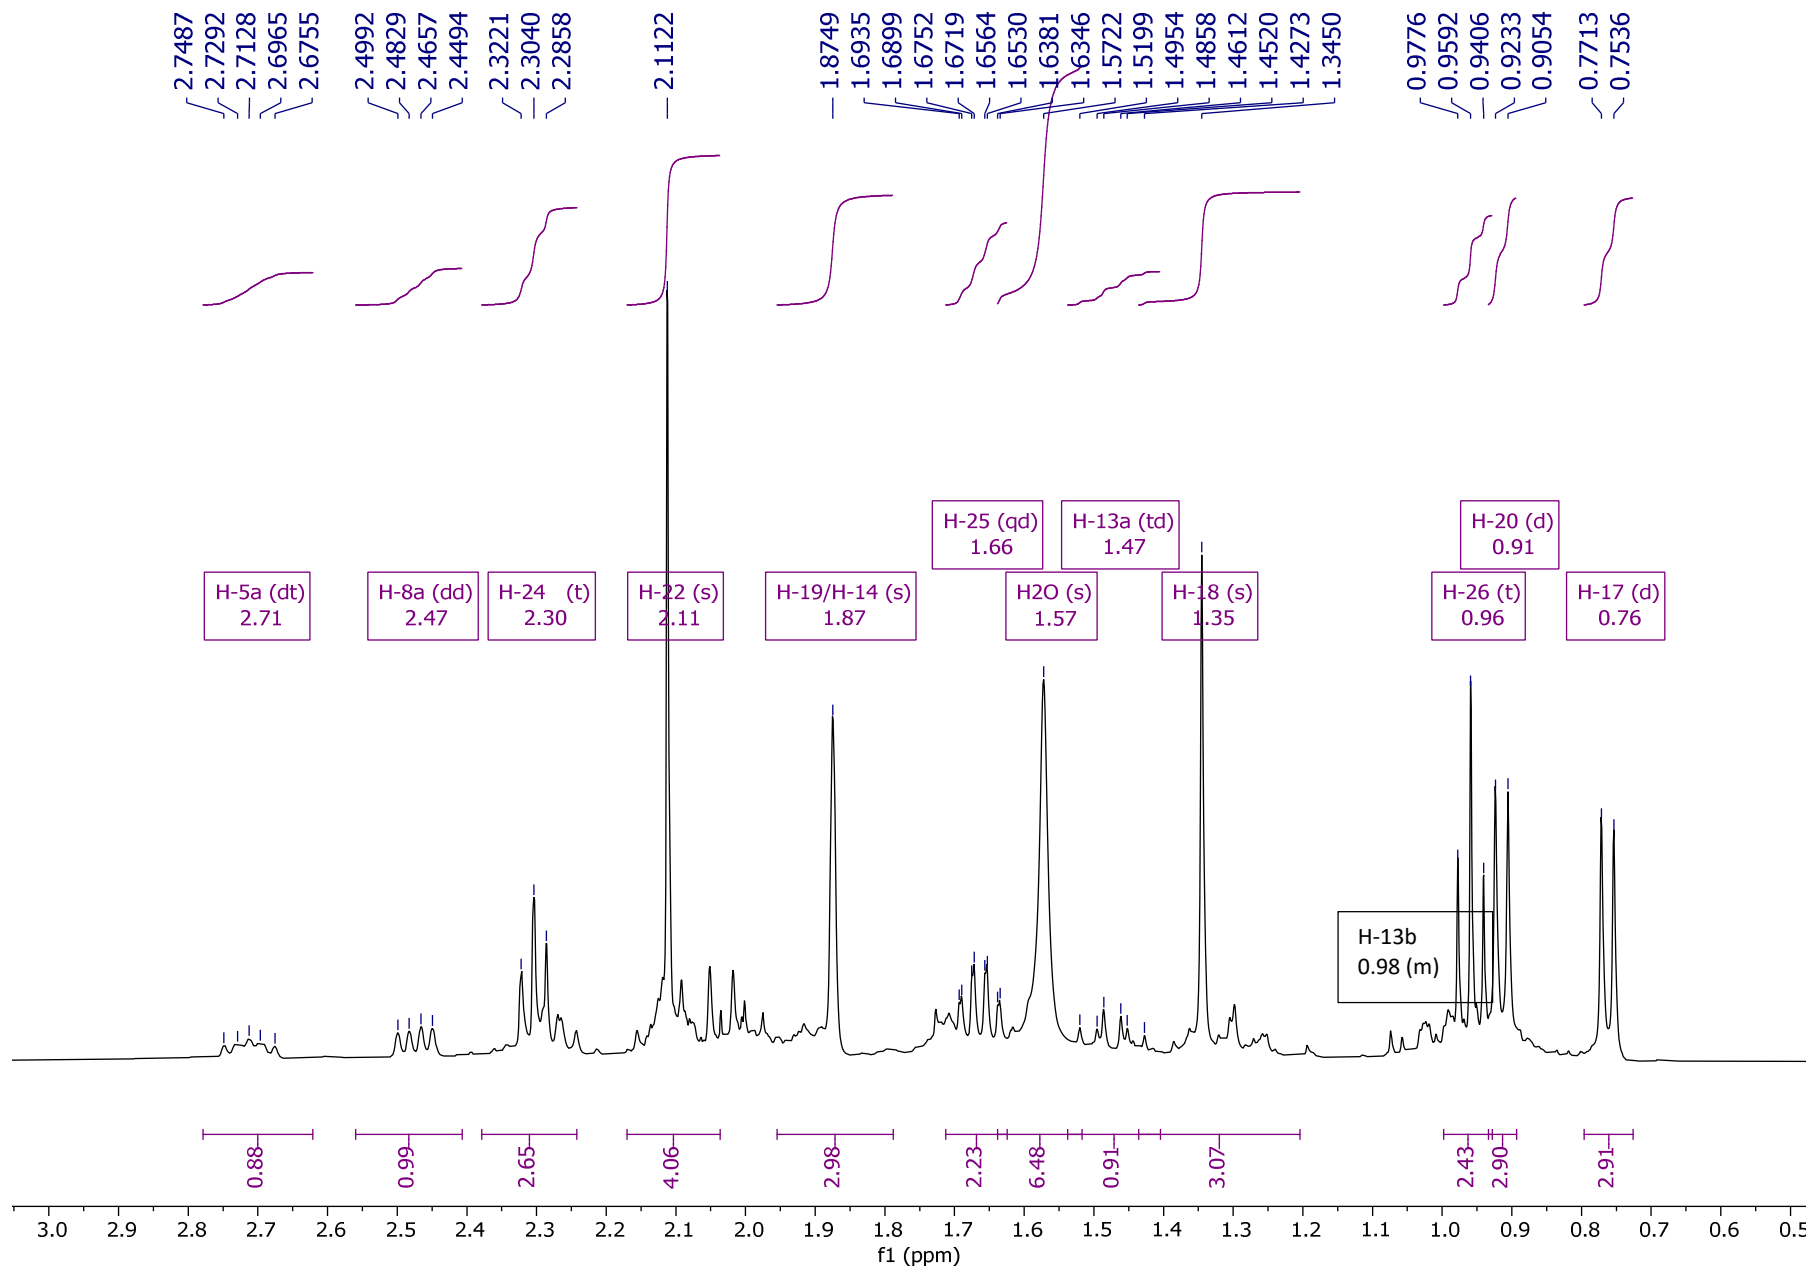

Figure S10. Asbestinin 27, <sup>13</sup>C NMR spectrum

Filename = JF1\_65\_05\_C13-2.jdf  
Author = DELTA  
Experiment = single\_pulse\_dec  
Sample\_Id = 13\_64\_01  
Solvent = CHLOROFORM-D  
Actual\_Start\_Time = 5-AUG-2015 16:50:00  
Revision\_Time = 8-AUG-2015 03:05:23

Comment = Single Pulse with Broad  
Data\_Format = 1D COMPLEX  
Dim\_Size = 32768  
X\_Domain = 13C  
Dim\_Title = 13C  
Dim\_Units = [ppm]  
Dimensions = X  
Site = Eclipse+ 400  
Spectrometer = DELTA\_NMR

Field\_Strength = 9.389766[T] (400[MHz])  
X\_Acq\_Duration = 1.3008896[s]  
X\_Domain = 13C  
X\_Freq = 100.52530333[MHz]  
X\_Offset = 100[ppm]  
X\_Points = 32768  
X\_Prescans = 4  
X\_Resolution = 0.76870474[Hz]  
X\_Sweep = 25.18891688[kHz]  
Irr\_Domain = 1H  
Irr\_Freq = 399.78219838[MHz]  
Irr\_Offset = 5[ppm]  
Clipped = FALSE  
Scans = 16384  
Total\_Scans = 16384

Relaxation\_Delay = 1[s]  
Recvr\_Gain = 27  
Temp\_Get = 26.8[dC]  
X\_90\_Width = 10[us]  
X\_Acq\_Time = 1.3008896[s]  
X\_Angle = 30[deg]  
X\_Pulse = 3.33333333[us]  
Initial\_Wait = 1[s]  
Unblank\_Time = 2[us]

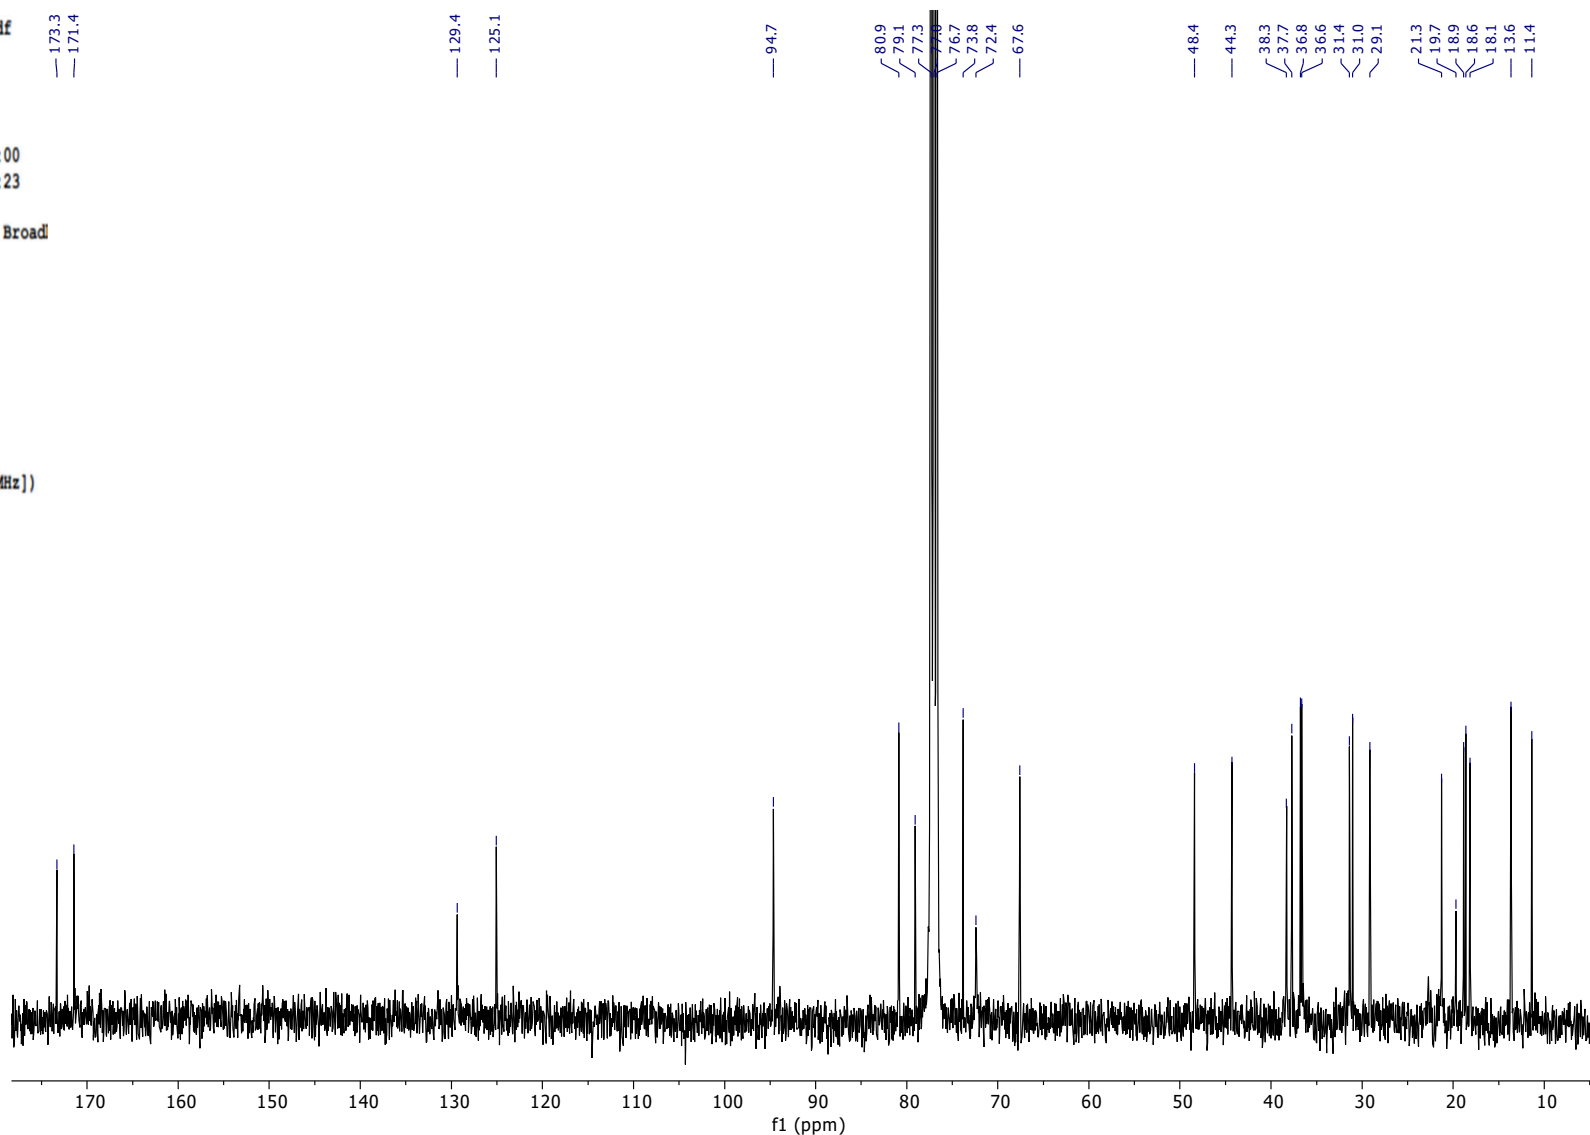

Figure S11. Asbestinin 27, DEPT-135 spectrum

Filename = JF1\_65\_05\_dept135-2.jdf  
 Author = DELTA  
 Experiment = dept\_dec.exp  
 Sample\_Id = I3\_68\_02  
 Solvent = CHLOROFORM-D  
 Actual\_Start\_Time = 17-AUG-2015 15:56:24  
 Revision\_Time = 14-JAN-2020 22:39:27

Comment = DEPT with decoupling  
 Data\_Format = 1D COMPLEX  
 Dim\_Size = 32768  
 X\_Domain = 13C  
 Dim\_Title = 13C  
 Dim\_Units = [ppm]  
 Dimensions = X  
 Site = Eclipse+ 400  
 Spectrometer = DELTA\_NMR

Field Strength = 9.389766[T] (400[MHz])  
 X\_Acq\_Duration = 1.3008896[s]  
 X\_Domain = 13C  
 X\_Freq = 100.52530333[MHz]  
 X\_Offset = 100[ppm]  
 X\_Points = 32768  
 X\_Prescans = 4  
 X\_Resolution = 0.76870474[Hz]  
 X\_Sweep = 25.18891688[kHz]  
 Irr\_Domain = 1H  
 Irr\_Freq = 399.78219838[MHz]  
 Irr\_Offset = 5[ppm]  
 Clipped = FALSE  
 Scans = 1024  
 Total\_Scans = 1024

Relaxation\_Delay = 2[s]  
 Recvr\_Gain = 27  
 Temp\_Get = 25.7[dC]  
 X\_Acq\_Time = 1.3008896[s]  
 X\_Pulse = 10[us]  
 Irr\_Pulse = 44.5[us]  
 Initial\_Wait = 1[s]  
 J\_Constant = 140[Hz]  
 Selection\_Angle = 135[deg]  
 Selection\_Pulse = 66.75[us]  
 Unblank\_Time = 2[us]

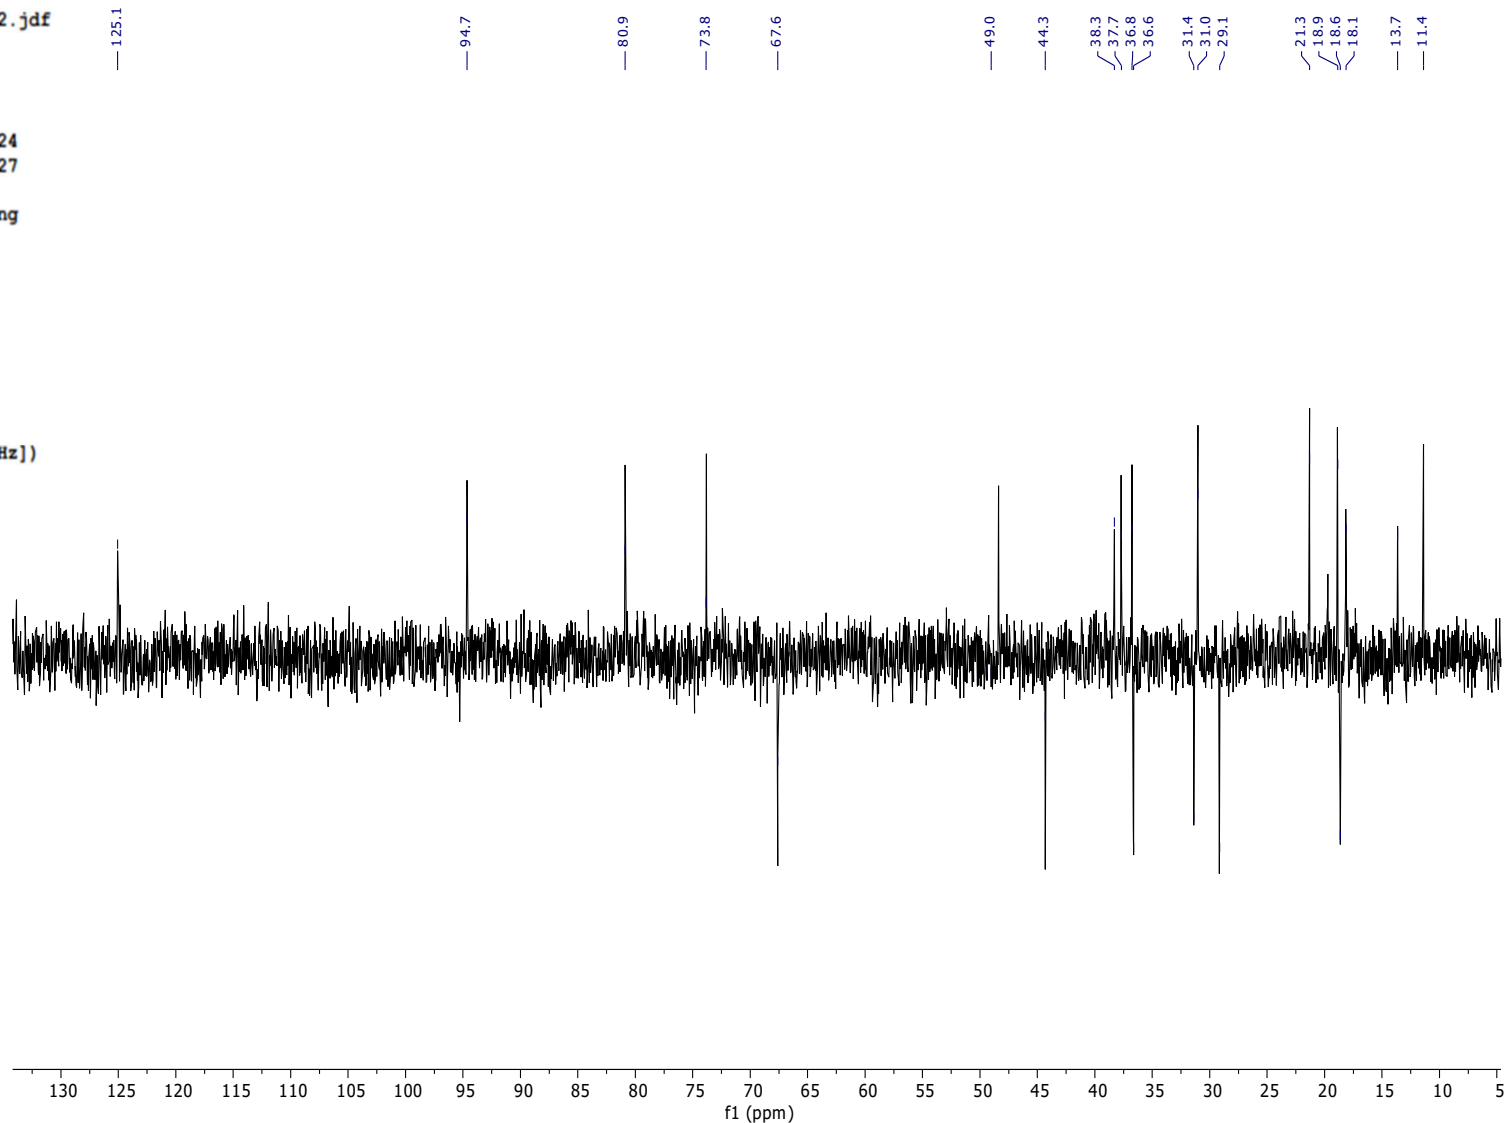

Figure S12. Asbestinin 27, COSY spectrum

```

Filename      = JF1_65_05_cosy-2.jdf
Author       = DELTA
Experiment   = cosy_pfg_s.exp
Sample Id    = I3_68_02
Solvent      = CHLOROFORM-D
Actual_Start_Time = 18-AUG-2015 04:45:39
Revision_Time  = 14-JAN-2020 22:44:12

Comment      = gradient absolute value
Data_Format  = 2D REAL REAL
Dim_Size     = 1024, 1024
X_Domain     = 1H
Y_Domain     = 1H
Dim_Title    = 1H 1H
Dim_Units    = [ppm] [ppm]
Dimensions   = X Y
Site         = Eclipse+ 400
Spectrometer = DELTA_NMR

Field_Strength = 9.389766[T] (400[MHz])
X_Acq_Duration = 0.2900992[s]
X_Domain       = 1H
X_Freq         = 399.78219838[MHz]
X_Offset       = 3.62959[ppm]
X_Points       = 1024
X_Prescans    = 4
X_Resolution  = 3.44709672[Hz]
X_Sweep       = 3.52982704[kHz]
Y_Domain       = 1H
Y_Freq         = 399.78219838[MHz]
Y_Offset       = 3.62959[ppm]
Y_Points       = 256
Y_Prescans    = 0
Y_Resolution  = 13.78838687[Hz]
Y_Sweep       = 3.52982704[kHz]
Clipped       = FALSE
Scans         = 8
Total_Scans   = 2048

Relaxation_Delay = 1[s]
Recvr_Gain       = 18
Temp_Get         = 23.6[dC]
X_90_Width      = 9.81[us]
X_Acq_Time      = 0.2900992[s]
X_Pulse         = 9.81[us]
Y_Acq_Time      = 72.5248[ms]
Grad_1          = 1[ms]
Grad_1_Amp      = 5[pnt]
Grad_1_Value    = 5[pnt*ms]
Grad_2          = 1[ms]
Grad_2_Amp      = 5[pnt]
Grad_2_Value    = 5[pnt*ms]
Grad_Recover    = 1[ms]
Grad_Selection  = 1:1
Grad_Shape      = square
Grad_Type       = 0
Initial_Wait    = 0.1[s]
Pulse_1         = 9.81[us]
Pulse_2         = 9.81[us]
Pulse_Angle_1  = 90[deg]
Pulse_Angle_2  = 90[deg]
T1              = 1[us]
Unblank_Time    = 2[us]
    
```

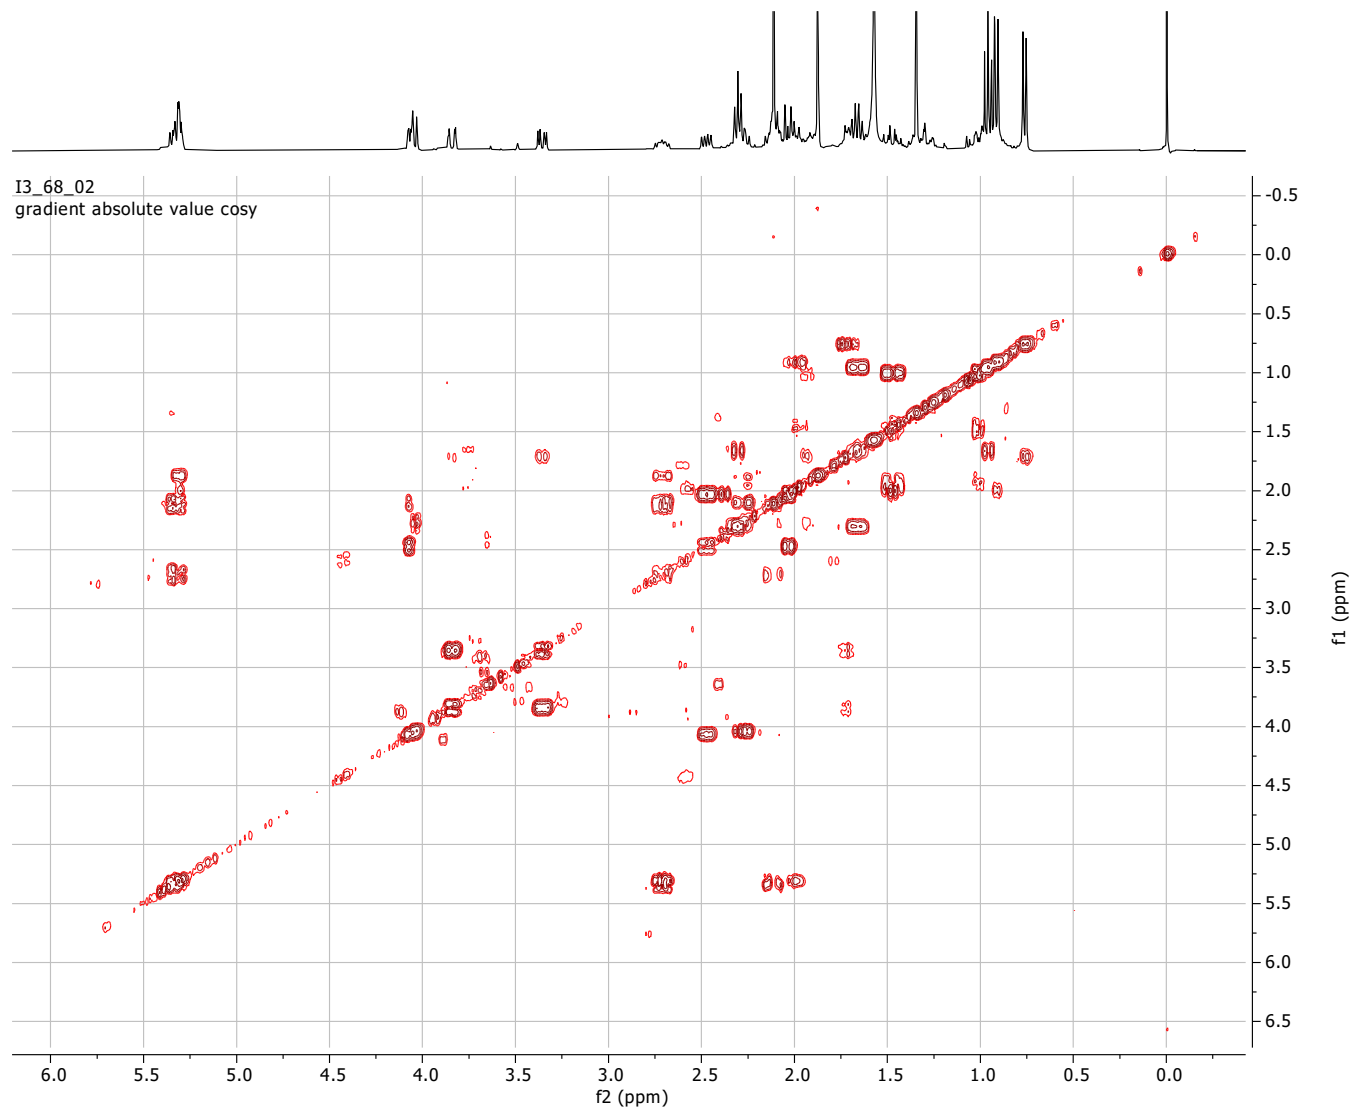

Figure S13. Asbestinin 27, HSQC spectrum

Filename = JF1\_65\_05\_hsqc-2.jdf  
 Author = DELTA  
 Experiment = multiplicity\_hsq  
 Sample\_Id = I3\_68\_02  
 Solvent = CHLOROFORM-D  
 Actual\_Start\_Time = 17-AUG-2015 17:02:39  
 Revision\_Time = 14-JAN-2020 22:50:48

Comment = Multiplicity HSQC  
 Data\_Format = 2D COMPLEX COMPLEX  
 Dim\_Size = 2048, 512  
 X\_Domain = 1H  
 Y\_Domain = 13C  
 Dim\_Title = 1H 13C  
 Dim\_Units = [ppm] [ppm]  
 Dimensions = X Y  
 Site = Eclipse+ 400  
 Spectrometer = DELTA\_NMR

Field\_Strength = 9.389766[T] (400[MHz])  
 X\_Acq\_Duration = 0.2900992[s]  
 X\_Domain = 1H  
 X\_Freq = 399.78219838[MHz]  
 X\_Offset = 3.62959[ppm]  
 X\_Points = 1024  
 X\_Prescans = 4  
 X\_Resolution = 3.44709672[Hz]  
 X\_Sweep = 3.52982704[kHz]  
 Y\_Domain = 13C  
 Y\_Freq = 100.52530333[MHz]  
 Y\_Offset = 100[ppm]  
 Y\_Points = 256  
 Y\_Prescans = 0  
 Y\_Resolution = 98.64267677[Hz]  
 Y\_Sweep = 25.25252525[kHz]  
 Clipped = FALSE  
 Scans = 16  
 Total\_Scans = 4096

Relaxation\_Delay = 2[s]  
 Recvr\_Gain = 30  
 Temp\_Get = 24.7[dC]  
 X\_Acq\_Time = 0.2900992[s]  
 X\_Pulse = 9.81[us]  
 Y\_Acq\_Time = 10.1376[ms]  
 Y\_Pulse = 12[us]  
 Enhance\_Temp = 12  
 Enhancement = 1/6J  
 Grad\_1 = 1[ms]  
 Grad\_1\_Amp = 4[pnt]  
 Grad\_1\_Value = 4[pnt\*ms]  
 Grad\_2 = 1[ms]  
 Grad\_2\_Amp = -1[pnt]  
 Grad\_2\_Value = -1[pnt\*ms]  
 Grad\_3 = 1[ms]  
 Grad\_3\_Amp = 1[pnt]  
 Grad\_Recover = 0.1[ms]  
 Grad\_Selection = 13C = 4:1  
 Grad\_Shape = square  
 Grad\_Type = 0  
 Initial\_Wait = 1[s]  
 J\_Constant = 140[Hz]  
 T1 = 1[us]  
 Tau = 0.5952381[ms]

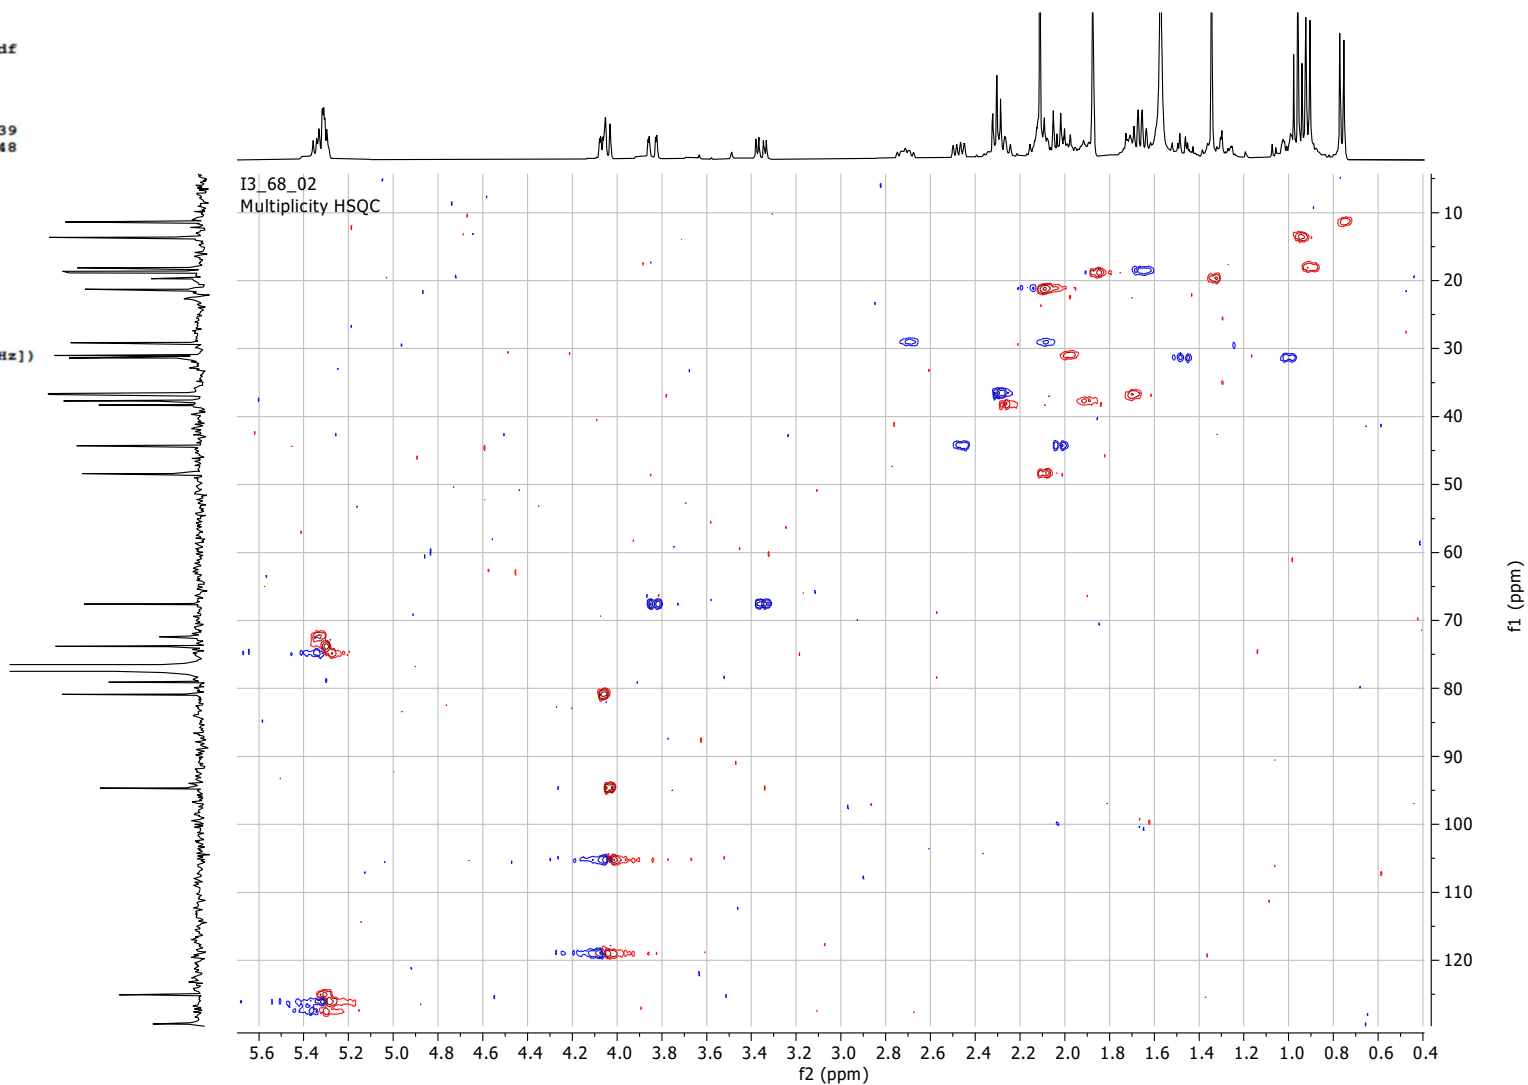

Figure S14. Asbestinin 27, HMBC spectrum

Filename = JF1\_65\_05\_hmbcOKOKOK-2.  
Author = DELTA  
Experiment = hmbc\_pfg\_s.exp  
Sample\_Id = I3\_68\_02  
Solvent = CHLOROFORM-D  
Actual\_Start\_Time = 17-AUG-2015 22:19:20  
Revision\_Time = 5-JUL-2019 17:15:31

Comment = gradient enhanced HMBC  
Data\_Format = 2D REAL REAL  
Dim\_Size = 1024, 512  
X\_Domain = 1H  
Y\_Domain = 13C  
Dim\_Title = 1H 13C  
Dim\_Units = [ppm] [ppm]  
Dimensions = X Y  
Site = Eclipse+ 400  
Spectrometer = DELTA\_NMR

Field\_Strength = 9.389766[T] (400[MHz])  
X\_Acq\_Duration = 0.2900992[s]  
X\_Domain = 1H  
X\_Freq = 399.78219838[MHz]  
X\_Offset = 3.62959[ppm]  
X\_Points = 1024  
X\_Prescans = 4  
X\_Resolution = 3.44709672[Hz]  
X\_Sweep = 3.52982704[kHz]  
Y\_Domain = 13C  
Y\_Freq = 100.52530333[MHz]  
Y\_Offset = 100[ppm]  
Y\_Points = 256  
Y\_Prescans = 0  
Y\_Resolution = 98.64267677[Hz]  
Y\_Sweep = 25.25252525[kHz]  
Clipped = FALSE  
Scans = 32  
Total\_Scans = 8192

Relaxation\_Delay = 2[s]  
Recvr\_Gain = 30  
Temp\_Get = 23.9[dc]  
X\_Acq\_Time = 0.2900992[s]  
X\_Pulse = 9.81[us]  
Y\_Acq\_Time = 10.1376[ms]  
Y\_Pulse = 12[us]  
Grad\_1 = 1[ms]  
Grad\_1\_Amp = 10[pnt]  
Grad\_1\_Value = 10[pnt\*ms]  
Grad\_2 = 1[ms]  
Grad\_2\_Amp = 10[pnt]  
Grad\_2\_Value = 10[pnt\*ms]  
Grad\_3 = 1[ms]  
Grad\_3\_Amp = 5[pnt]  
Grad\_3\_Value = 5[pnt\*ms]  
Grad\_Recover = 0.2[ms]  
Grad\_Selection = 13C = 2:2:1  
Grad\_Shape = square  
Grad\_Type = 0  
Initial\_Wait = 1[s]  
J\_Constant = 140[Hz]  
Long\_Range\_J = 8[Hz]  
T1 = 1[us]  
Unblank\_Time = 2[us]

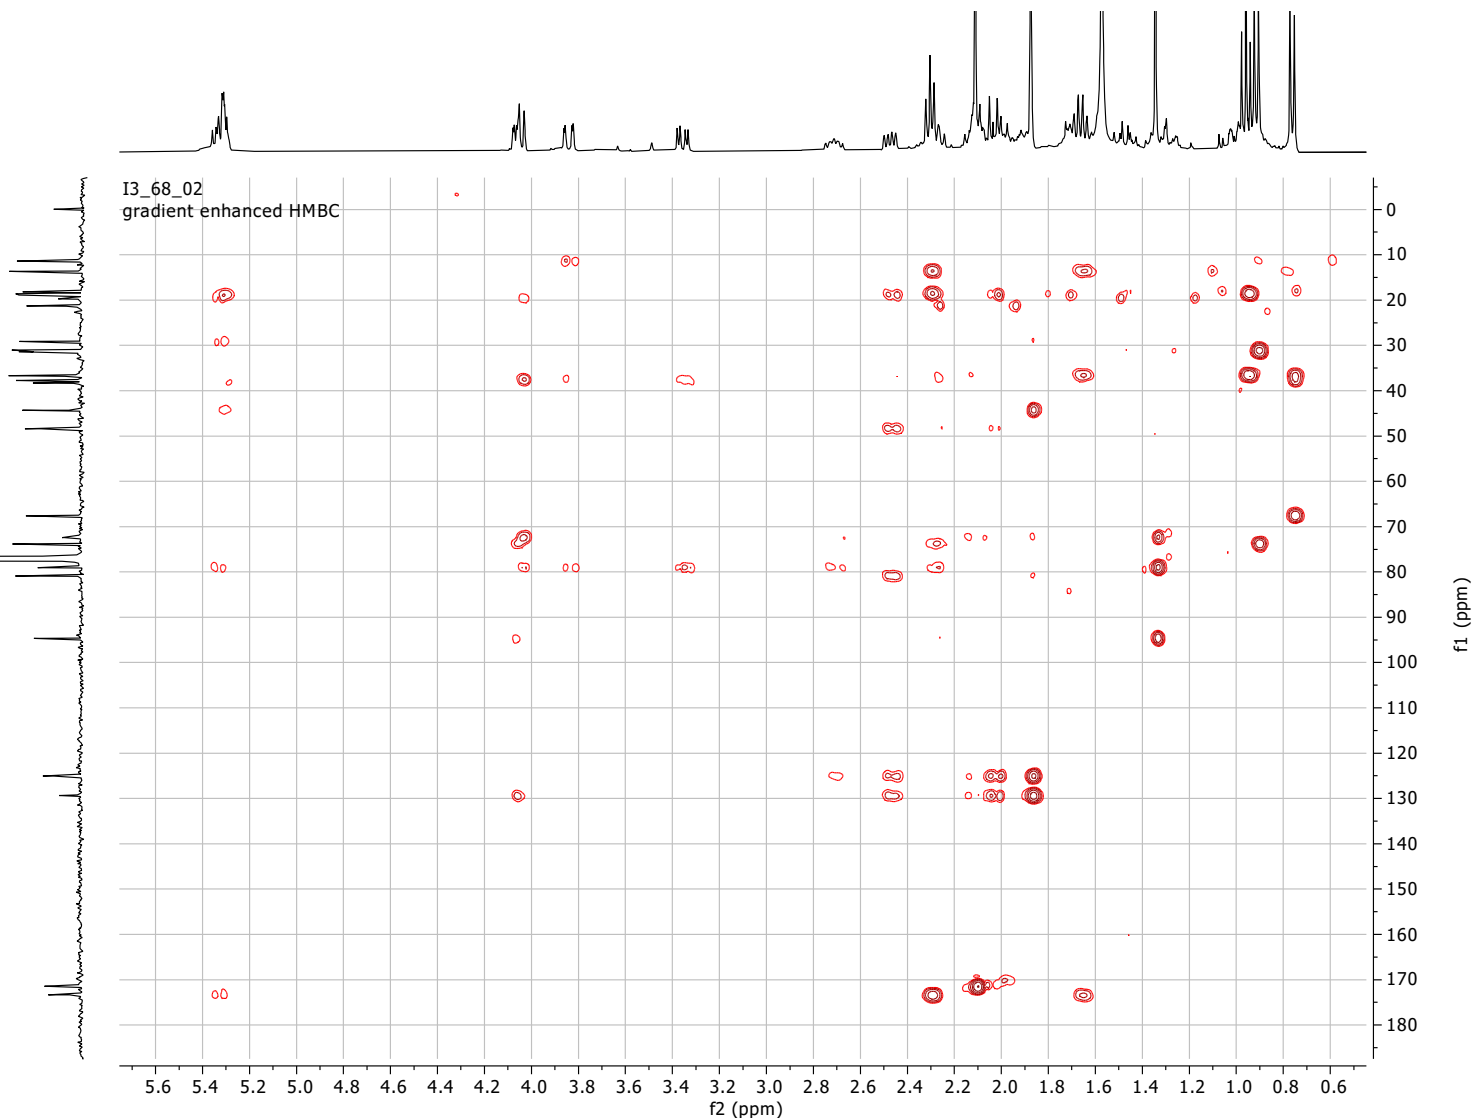

Figure S15. Asbestinin 27, NOE spectra

Irradiation of H-17

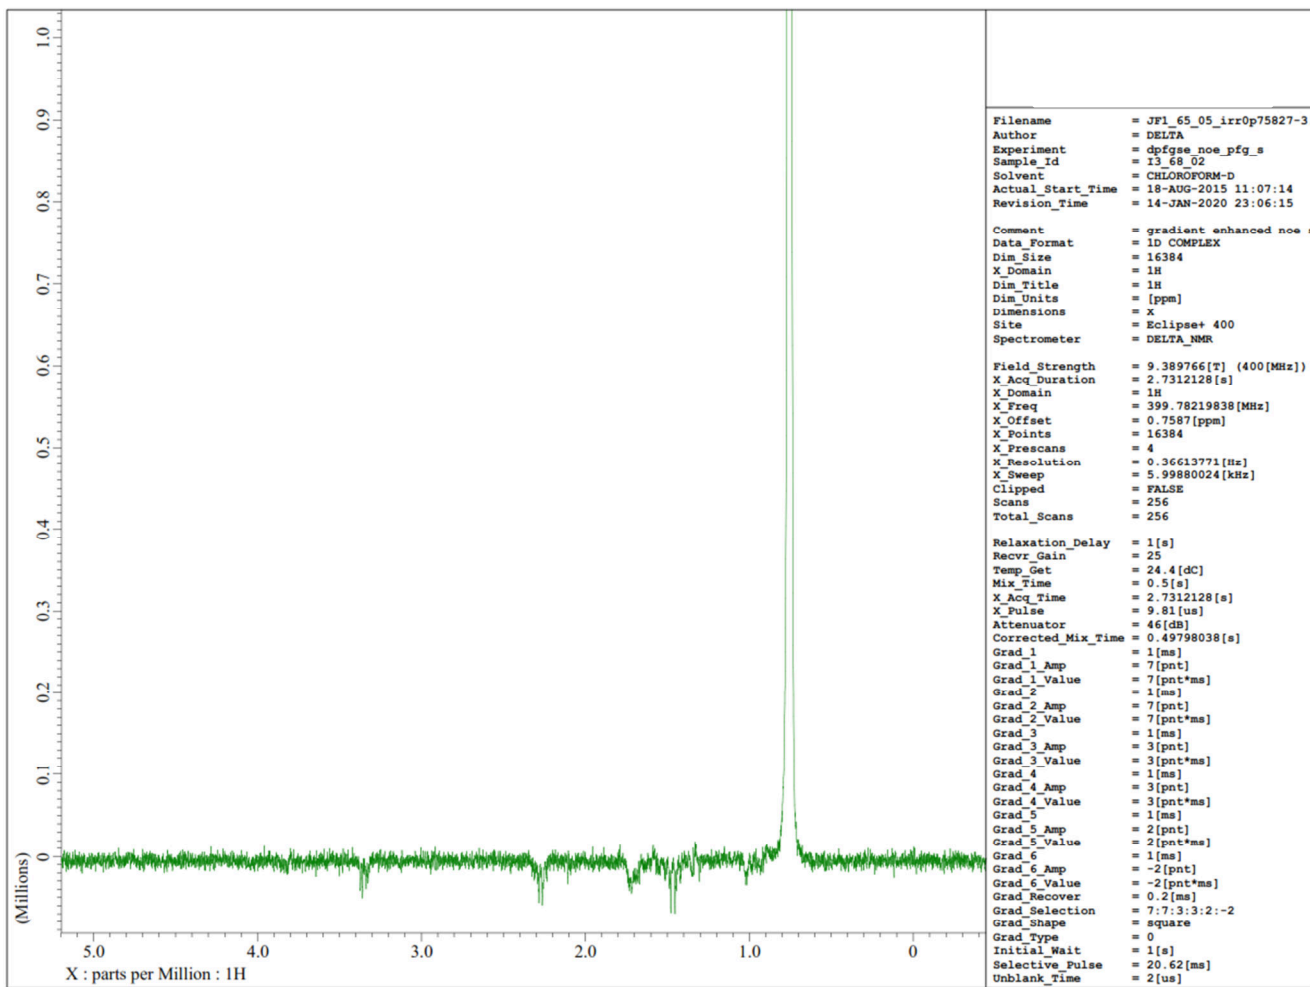



Figure S15. Asbestinin 27, NOE spectra

Irradiation of H-2

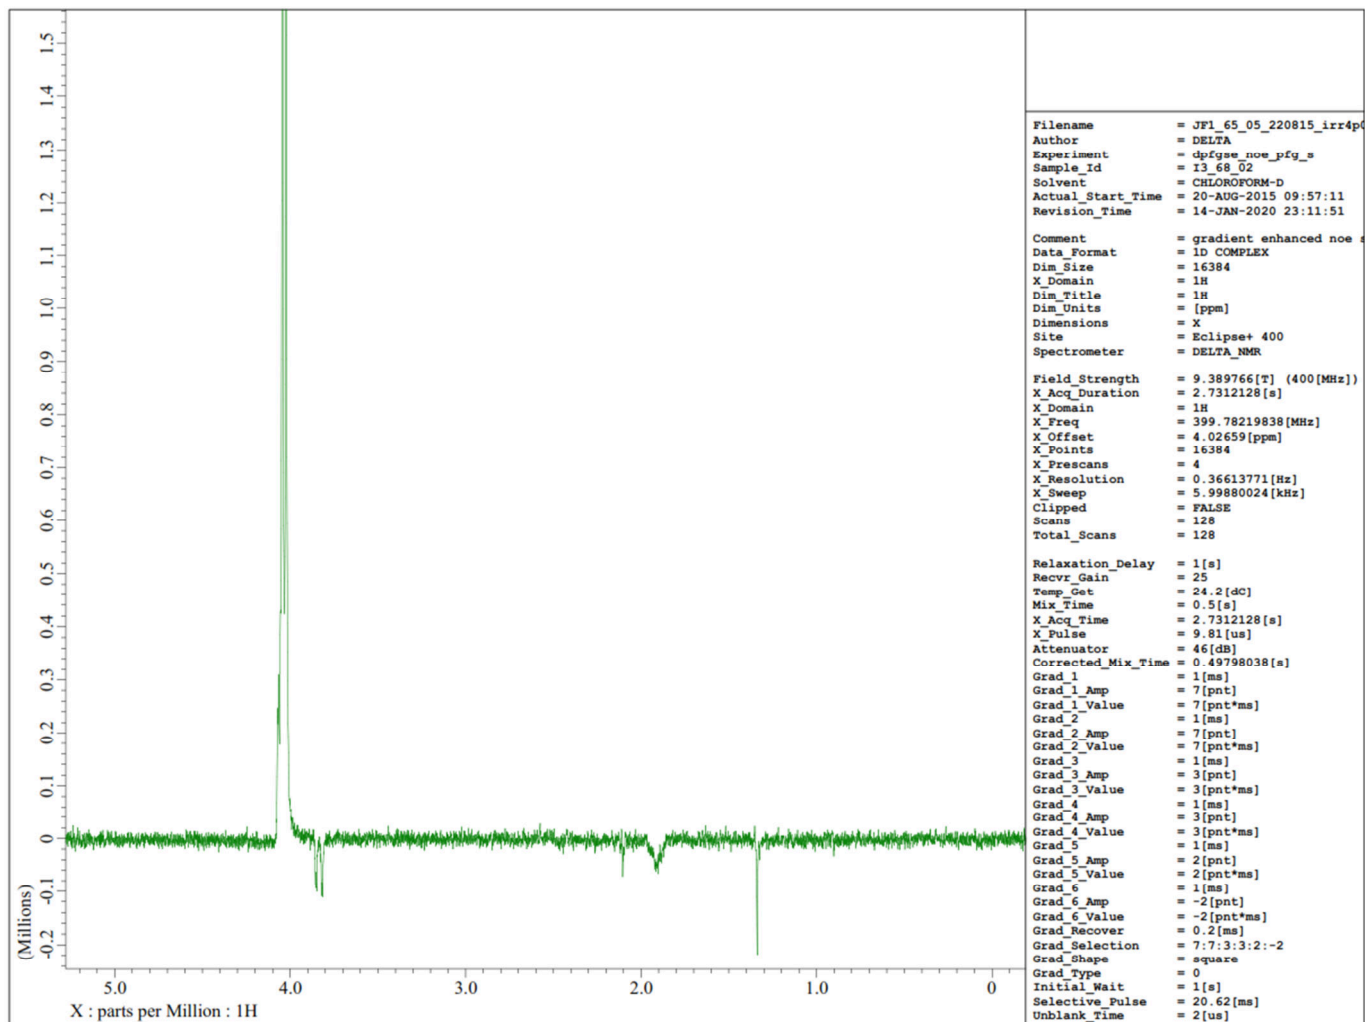

Figure S15. Asbestinin 27, NOE spectra

Irradiation of H-18

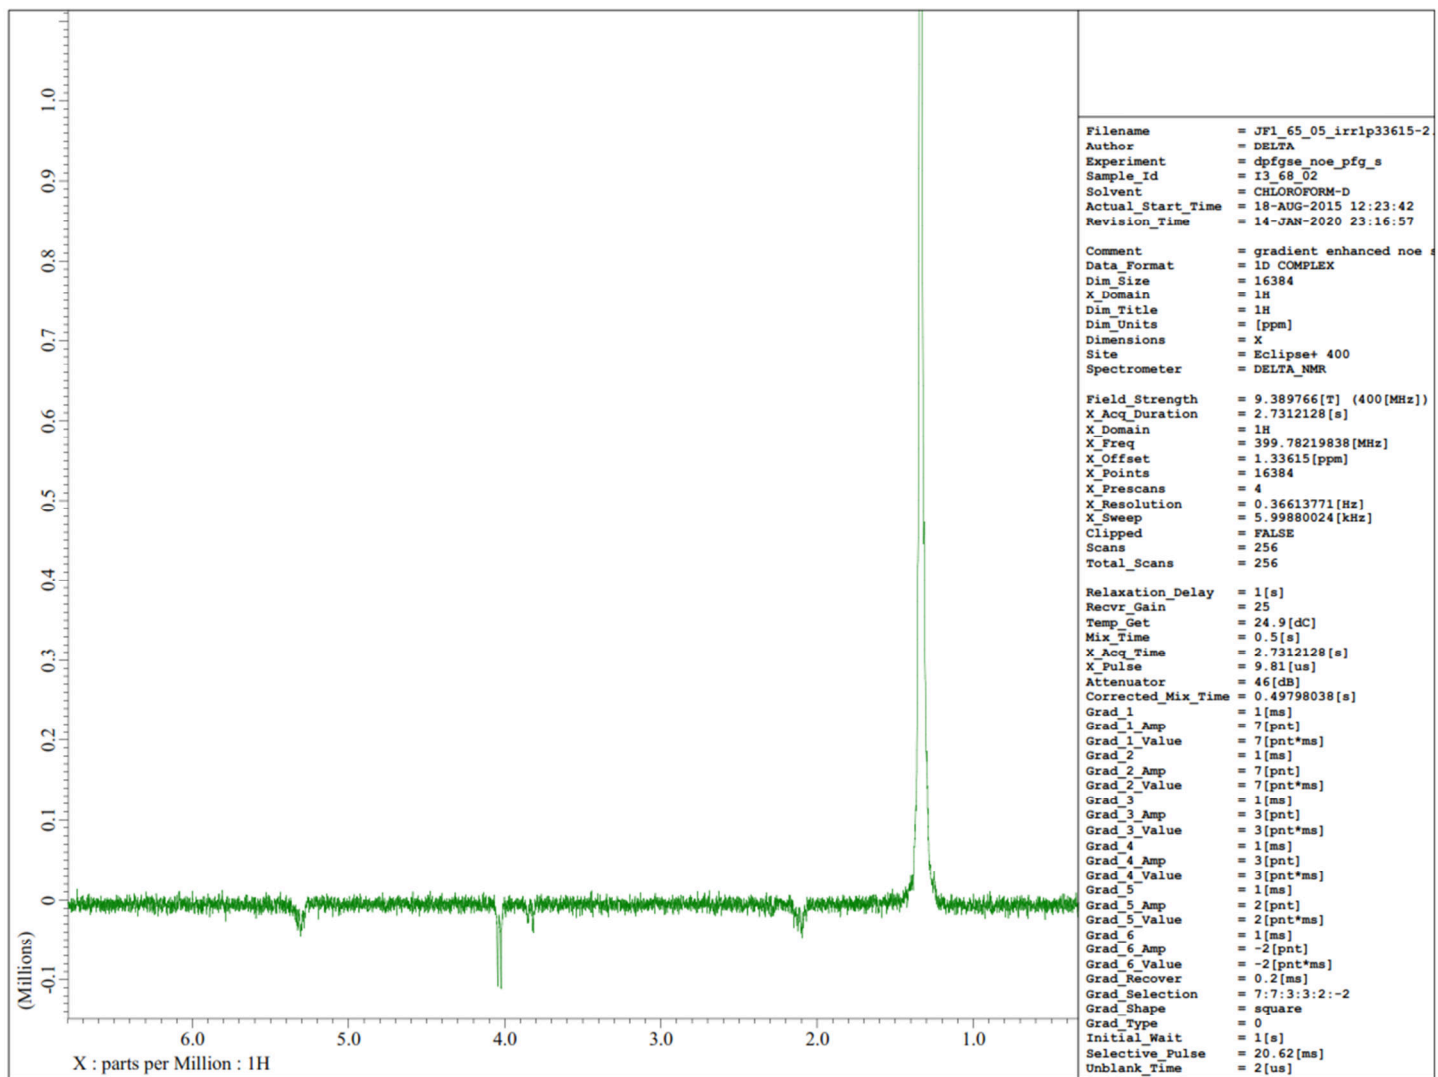

Figure S15. Asbestinin 27, NOE spectra

Irradiation of H-10

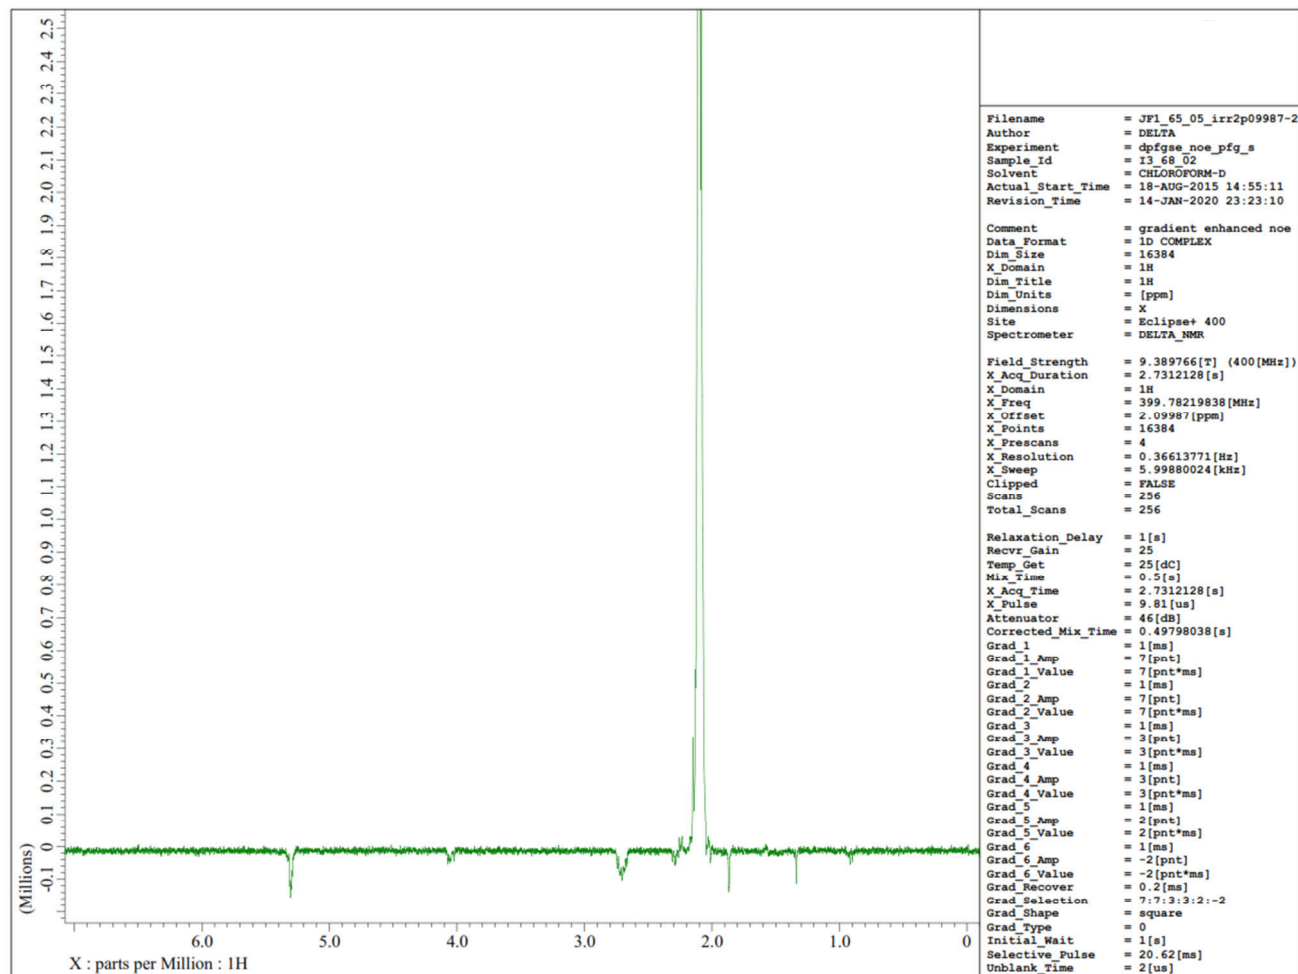

Figure S15. Asbestinin 27, NOE spectra

Irradiation of H-1

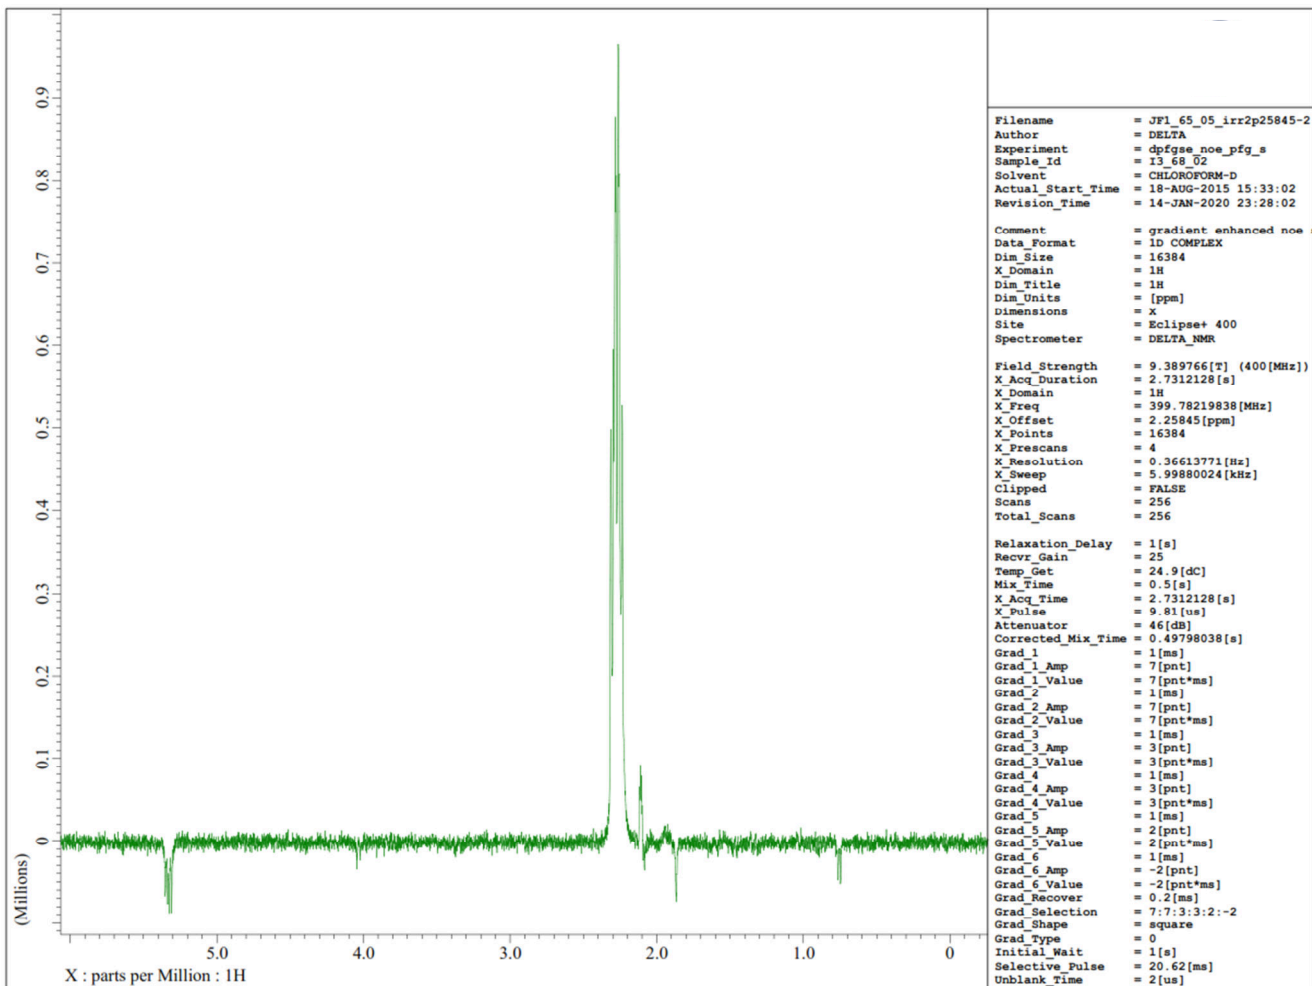

Figure S15. Asbestinin 27, NOE spectra

Irradiation of H-12

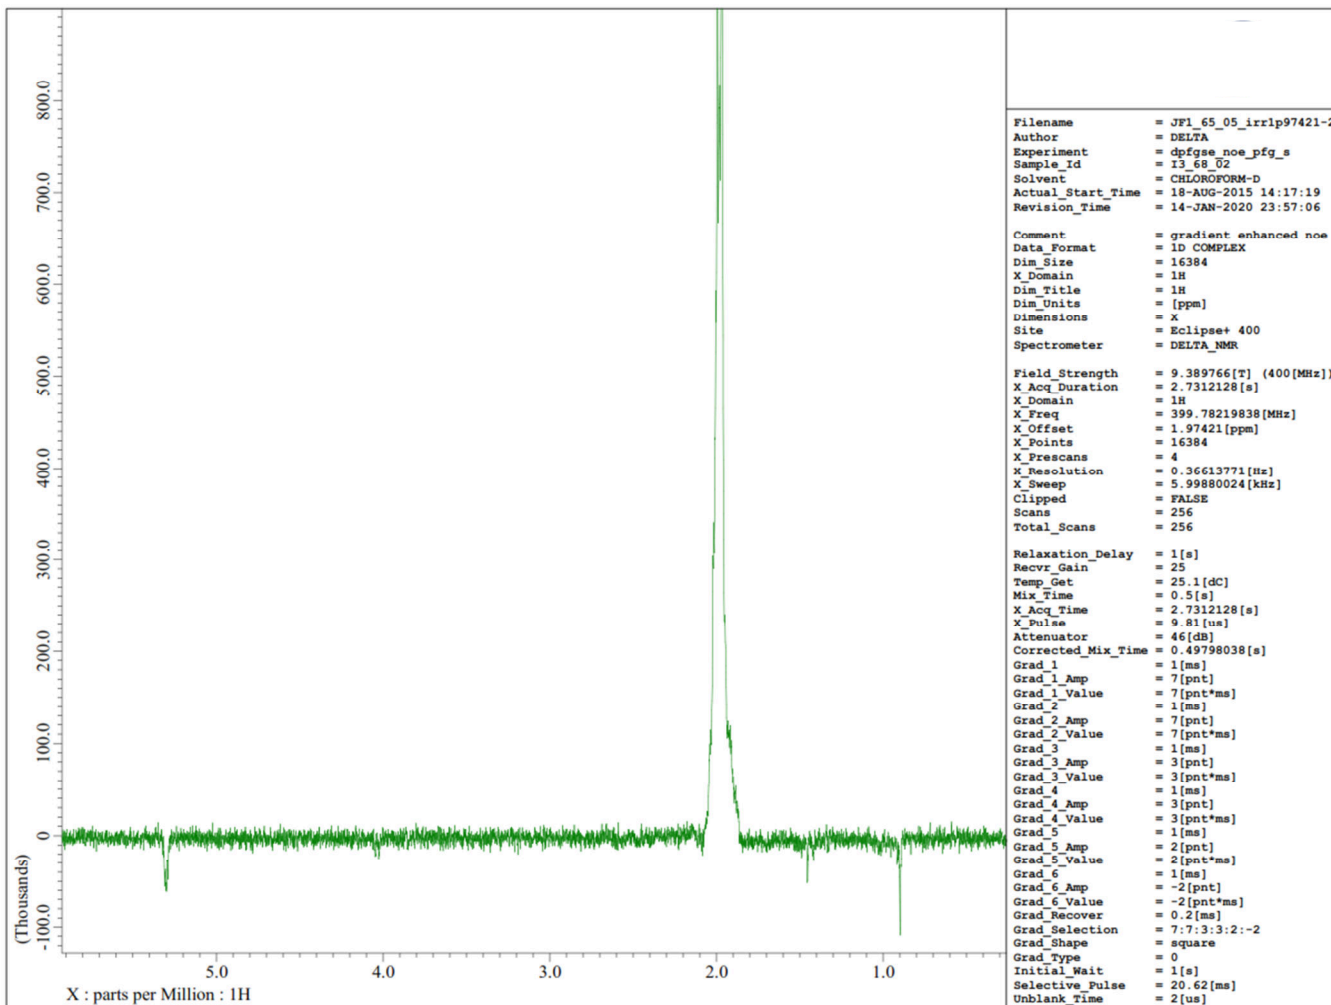

Figure S16. Asbestinin 27, HR-ESITOFMS spectra

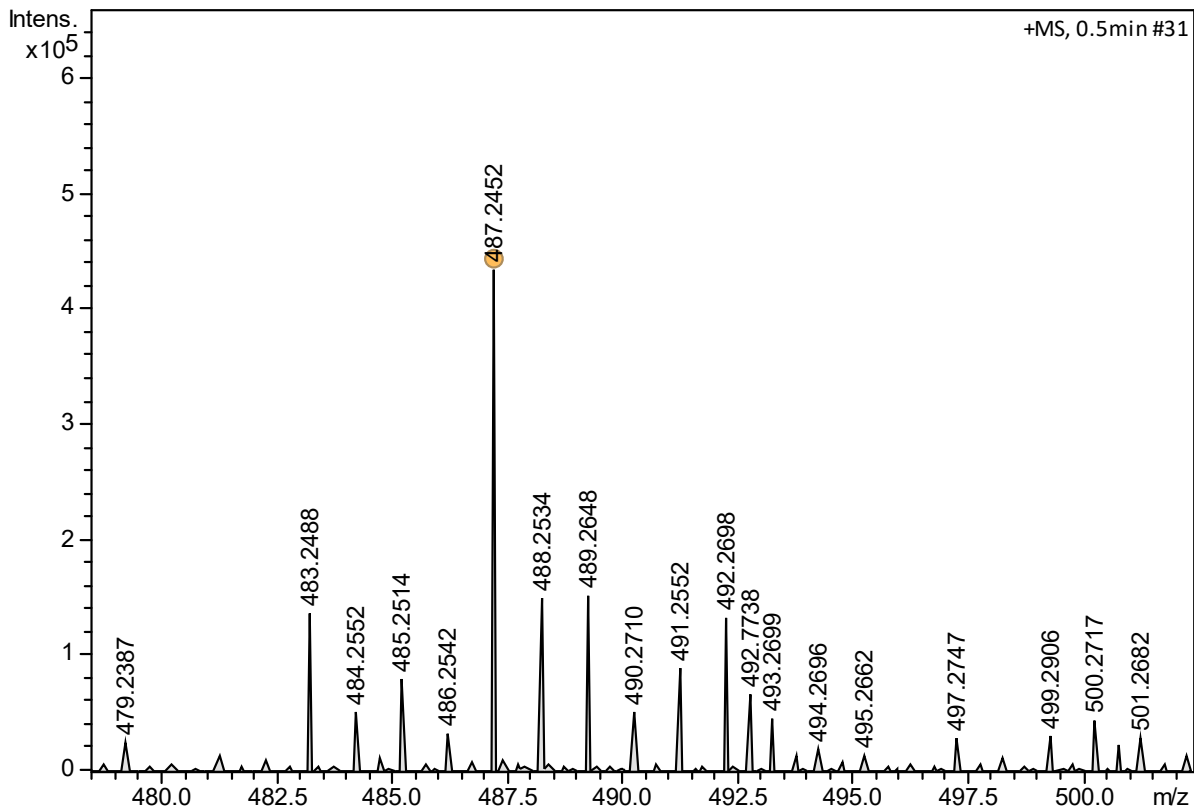

Figure S17. Asbestinin 28, <sup>1</sup>H NMR spectrum

```

Filename      = JF1_65_09-4.jdf
Author       = DELTA
Experiment    = single_pulse.exp
Sample_Id    = I3_62_05
Solvent      = CHLOROFORM-D
Actual_Start_Time = 3-AUG-2015 18:05:47
Revision_Time  = 22-AUG-2015 07:42:29

Comment      = Single Pulse Experiment,
Data_Format  = 1D COMPLEX
Dim_Size     = 16384
X_Domain     = 1H
Dim_Title    = 1H
Dim_Units    = [ppm]
Dimensions   = X
Site         = Eclipse+ 400
Spectrometer = DELTA_NMR

Field_Strength = 9.389766[T] (400[MHz])
X_Acq_Duration = 2.048[s]
X_Domain      = 1H
X_Freq       = 399.78219838[MHz]
X_Offset     = 7[ppm]
X_Points     = 16384
X_Prescans   = 0
X_Resolution = 0.48828125[Hz]
X_Sweep      = 8[kHz]
Clipped      = FALSE
Scans        = 8
Total_Scans  = 8

Relaxation_Delay = 4[s]
Recvr_Gain      = 13
Temp_Get       = 24.7[dC]
X_90_Width    = 9.81[us]
X_Acq_Time    = 2.048[s]
X_Angle       = 45[deg]
X_Pulse       = 4.905[us]
Initial_Wait  = 1[s]
Unblank_Time  = 2[us]
    
```

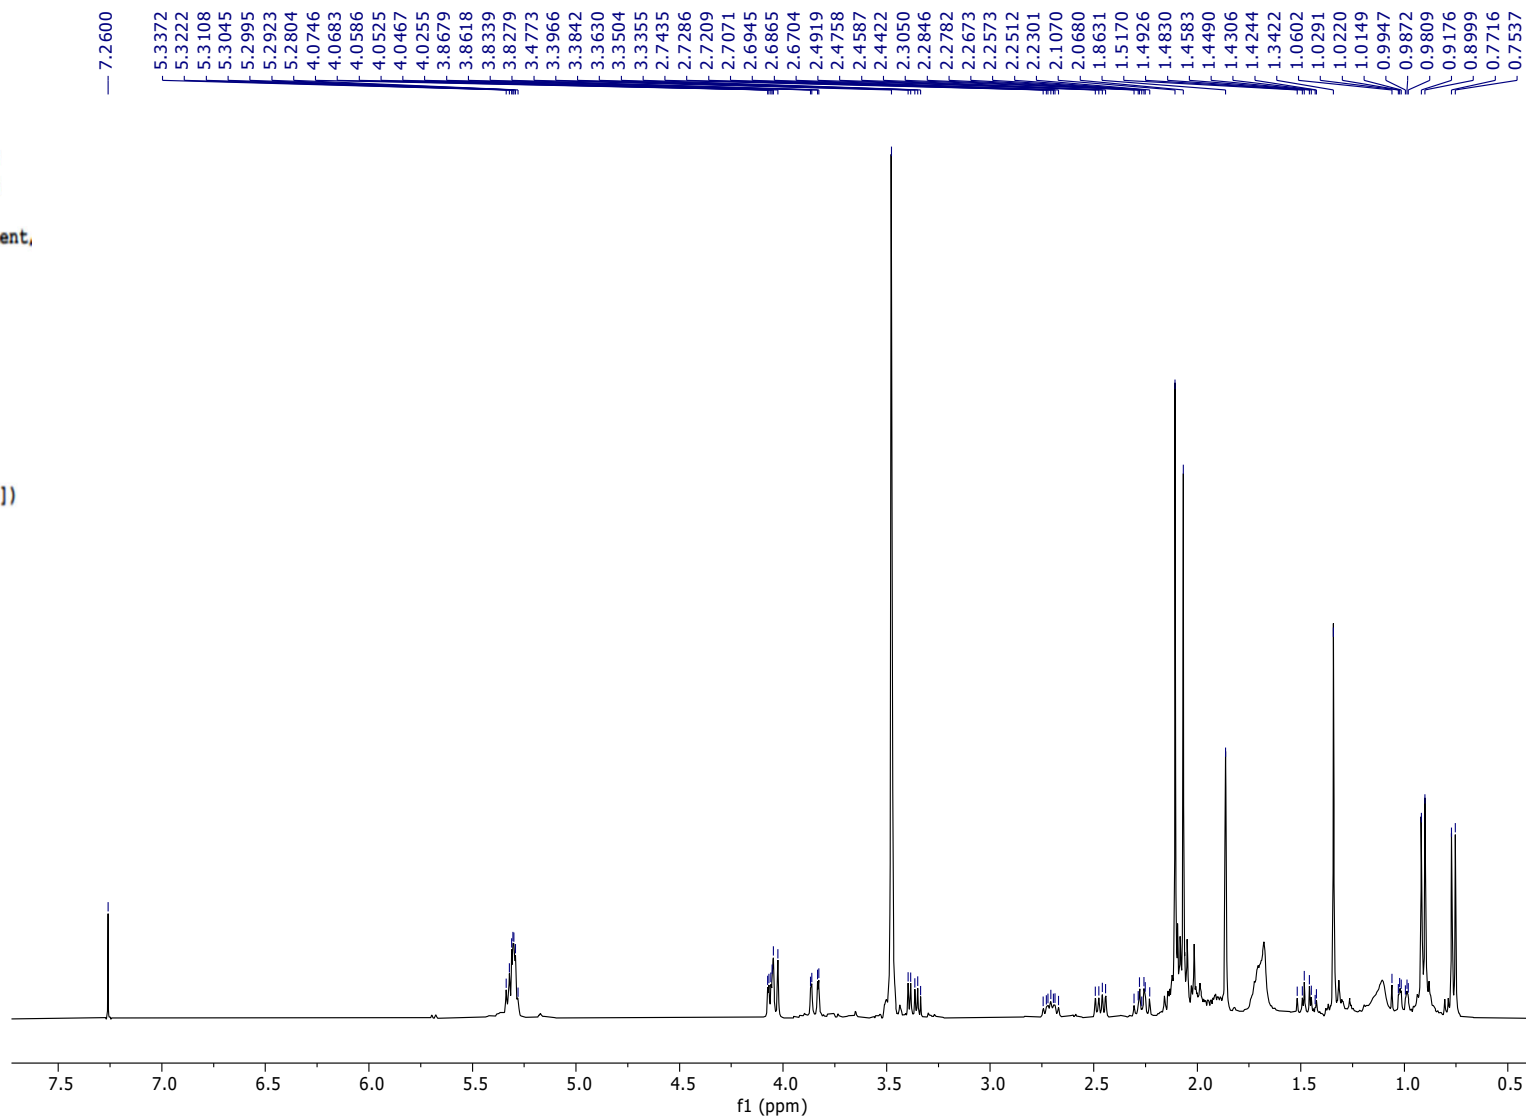

Figure S17. Asbestinin 28, <sup>1</sup>H NMR spectrum (expanded)

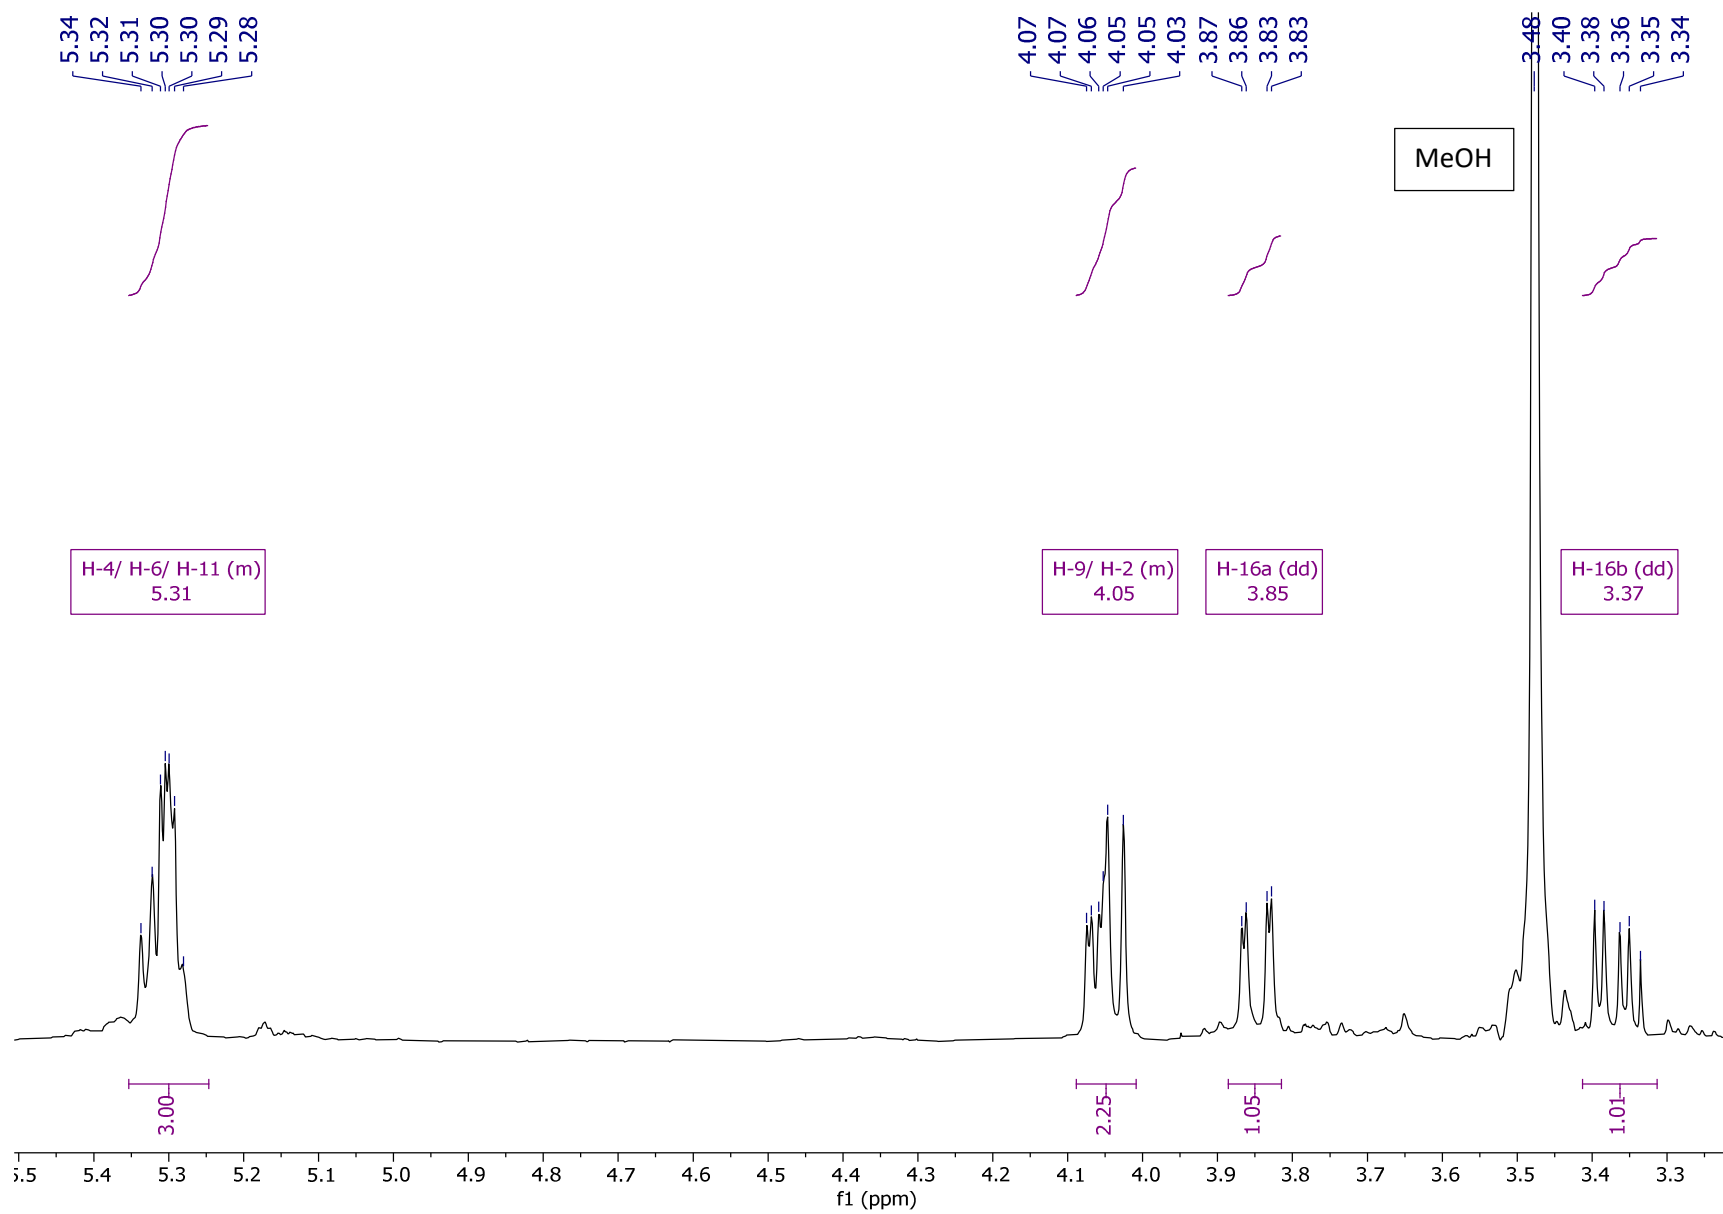



Figure S17. Asbestinin 28, <sup>1</sup>H NMR spectrum (expanded)

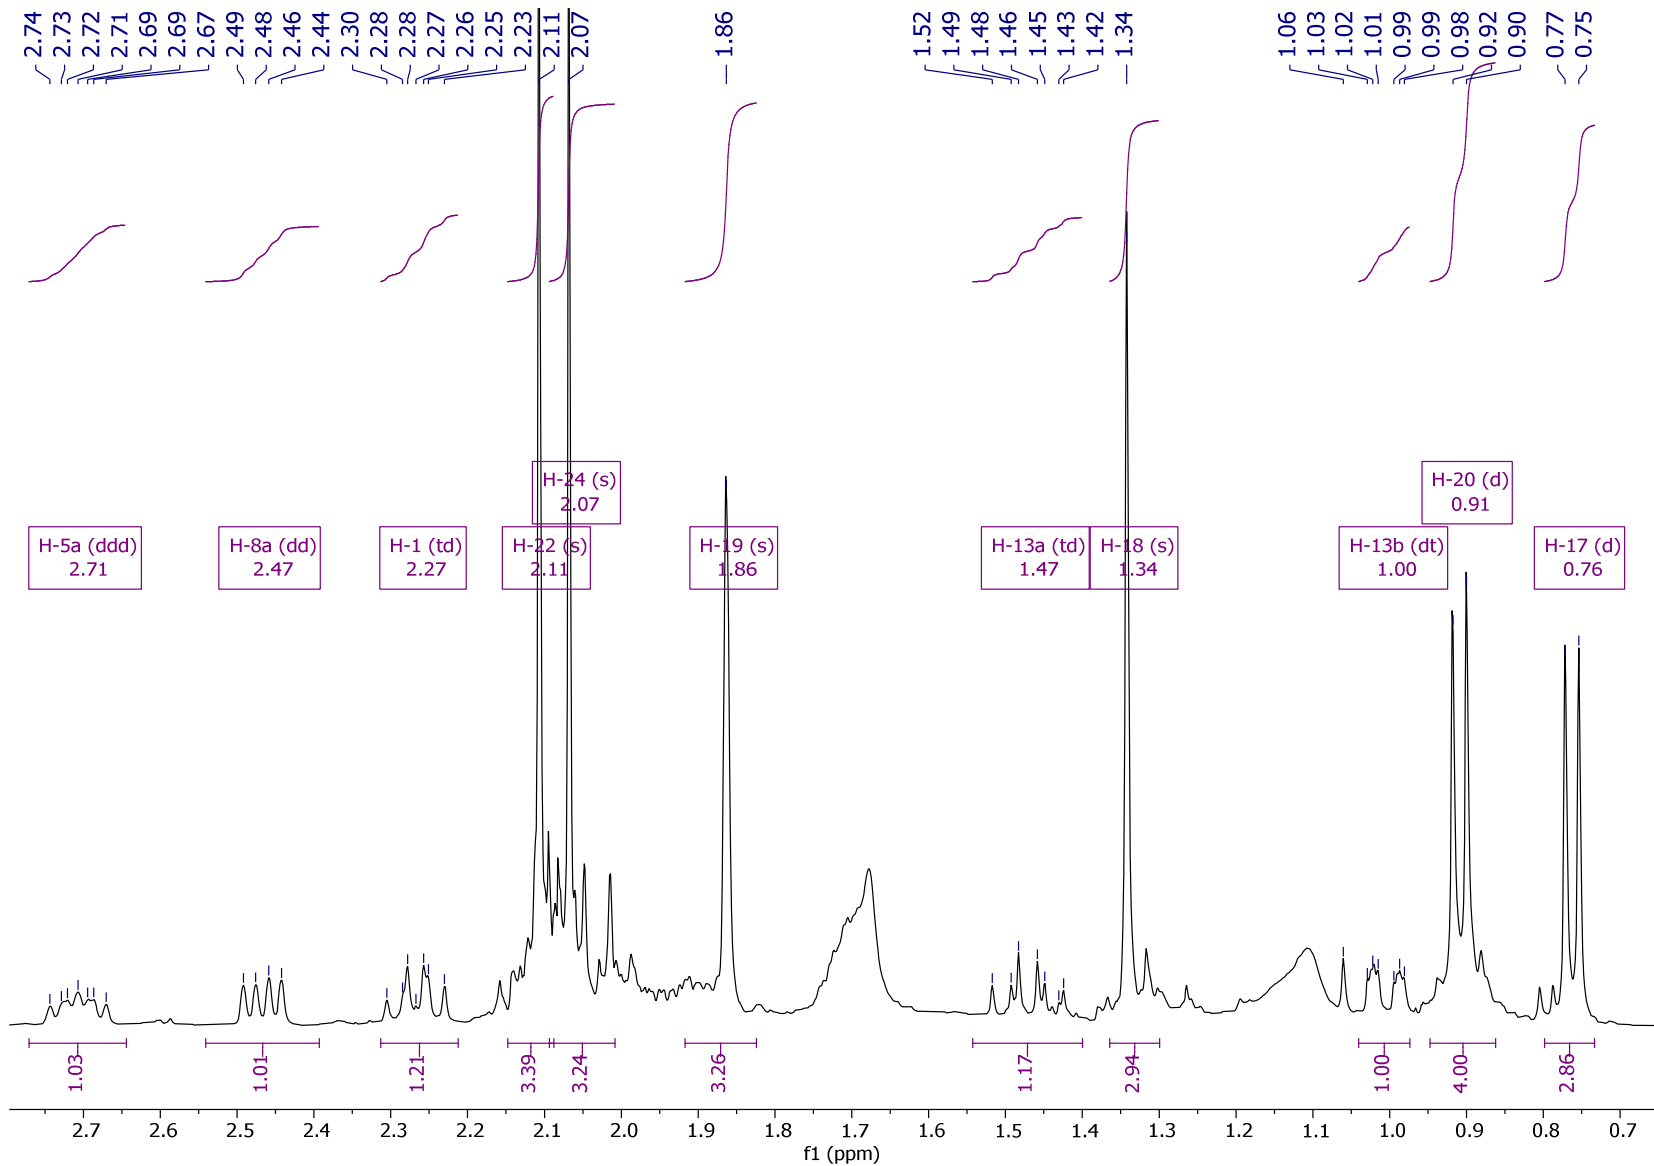

Figure S18. Asbestinin 28, <sup>13</sup>C NMR spectrum

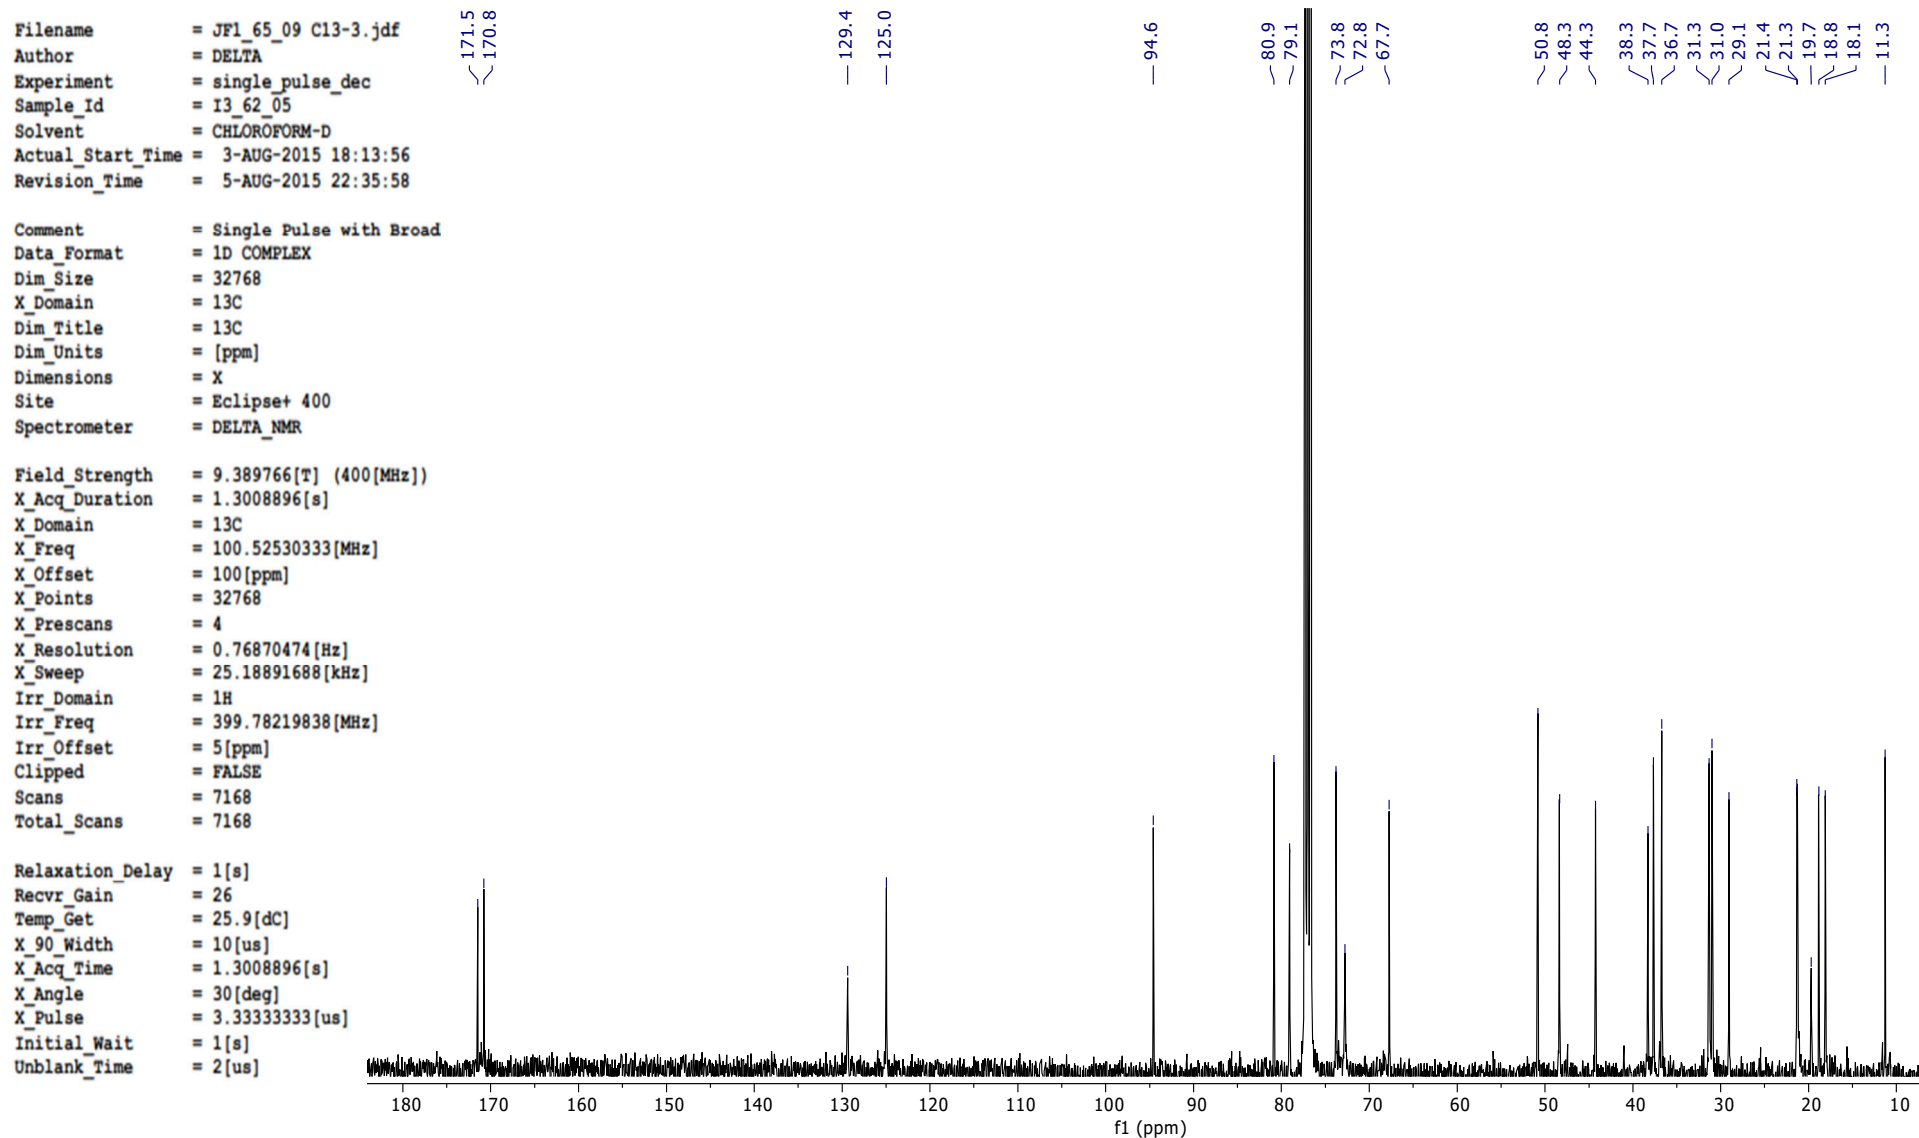

Figure S19. Asbestinin 28, DEPT-135 spectrum

Filename = JF1\_65\_09 dept135-2.jdf  
Author = DELTA  
Experiment = dept\_dec.exp  
Sample\_Id = I3\_62\_05  
Solvent = CHLOROFORM-D  
Actual\_Start\_Time = 3-AUG-2015 22:49:50  
Revision\_Time = 6-AUG-2015 01:26:36

Comment = DEPT with decoupling  
Data\_Format = 1D COMPLEX  
Dim\_Size = 32768  
X\_Domain = 13C  
Dim\_Title = 13C  
Dim\_Units = [ppm]  
Dimensions = X  
Site = Eclipse+ 400  
Spectrometer = DELTA\_NMR

Field\_Strength = 9.389766[T] (400[MHz])  
X\_Acq\_Duration = 1.3008896[s]  
X\_Domain = 13C  
X\_Freq = 100.52530333[MHz]  
X\_Offset = 100[ppm]  
X\_Points = 32768  
X\_Prescans = 4  
X\_Resolution = 0.76870474[Hz]  
X\_Sweep = 25.18891688[kHz]  
Irr\_Domain = 1H  
Irr\_Freq = 399.78219838[MHz]  
Irr\_Offset = 5[ppm]  
Clipped = FALSE  
Scans = 3072  
Total\_Scans = 3072

Relaxation\_Delay = 2[s]  
Recvr\_Gain = 26  
Temp\_Get = 24.9[dC]  
X\_Acq\_Time = 1.3008896[s]  
X\_Pulse = 10[us]  
Irr\_Pulse = 44.5[us]  
Initial\_Wait = 1[s]  
J\_Constant = 140[Hz]  
Selection\_Angle = 135[deg]  
Selection\_Pulse = 66.75[us]  
Unblank\_Time = 2[us]

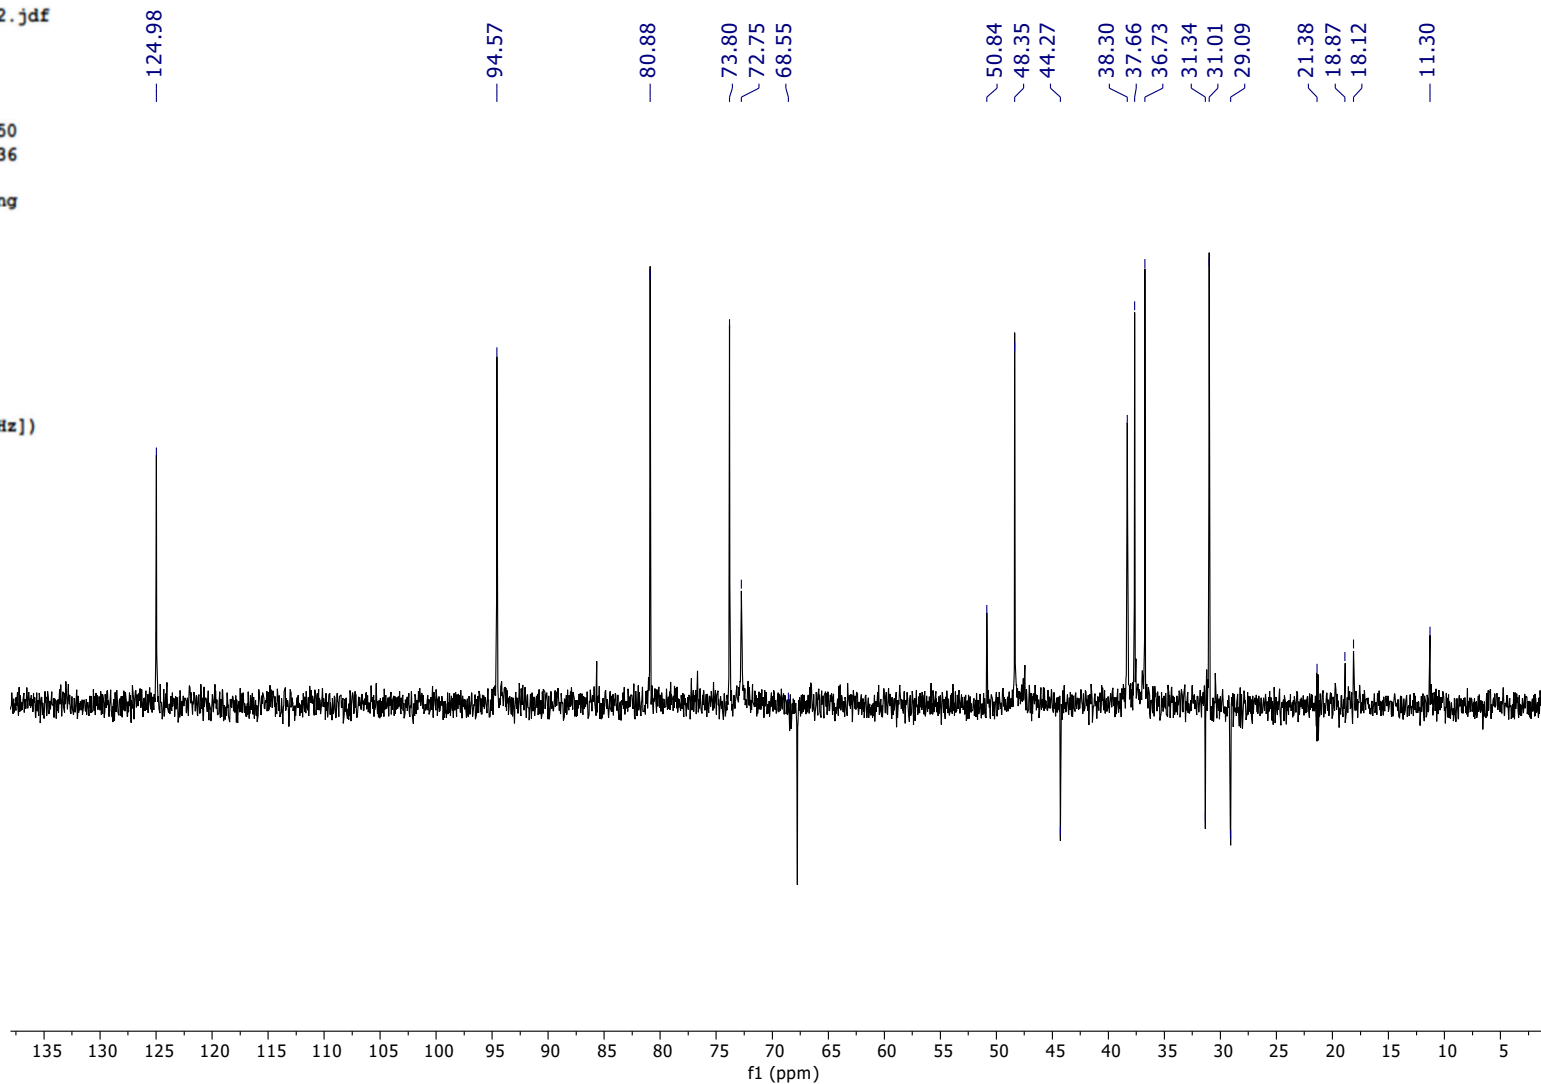

Figure S20. Asbestinin 28, COSY spectrum

Filename = JF1\_65\_09\_pfgcosy-2.jdf  
Author = DELTA  
Experiment = cosy\_pfg\_s\_exp  
Sample\_Id = I3\_62\_05  
Solvent = CHLOROFORM-D  
Actual\_Start\_Time = 4-AUG-2015 14:37:02  
Revision\_Time = 6-AUG-2015 15:54:25

Comment = gradient absolute value  
Data\_Format = 2D REAL REAL  
Dim\_Size = 1024, 1024  
X\_Domain = 1H  
Y\_Domain = 1H  
Dim\_Title = 1H 1H  
Dim\_Units = [ppm] [ppm]  
Dimensions = X Y  
Site = Eclipse+ 400  
Spectrometer = DELTA\_NMR

Field\_Strength = 9.389766[T] (400[MHz])  
X\_Acq\_Duration = 0.2832384[s]  
X\_Domain = 1H  
X\_Freq = 399.78219838[MHz]  
X\_Offset = 3.76611[ppm]  
X\_Points = 1024  
X\_Prescans = 4  
X\_Resolution = 3.53059472[Hz]  
X\_Sweep = 3.61532899[kHz]  
Y\_Domain = 1H  
Y\_Freq = 399.78219838[MHz]  
Y\_Offset = 3.76611[ppm]  
Y\_Points = 256  
Y\_Prescans = 0  
Y\_Resolution = 14.12237889[Hz]  
Y\_Sweep = 3.61532899[kHz]  
Clipped = TRUE  
Scans = 16  
Total\_Scans = 4096

Relaxation\_Delay = 1[s]  
Recvr\_Gain = 22  
Temp\_Get = 25.8[dC]  
X\_90\_Width = 9.81[us]  
X\_Acq\_Time = 0.2832384[s]  
X\_Pulse = 9.81[us]  
Y\_Acq\_Time = 70.8096[ms]  
Grad\_1 = 1[ms]  
Grad\_1\_Amp = 5[pnt]  
Grad\_1\_Value = 5[pnt\*ms]  
Grad\_2 = 1[ms]  
Grad\_2\_Amp = 5[pnt]  
Grad\_2\_Value = 5[pnt\*ms]  
Grad\_Recover = 1[ms]  
Grad\_Selection = 1:1  
Grad\_Shape = square  
Grad\_Type = 0  
Initial\_Wait = 0.1[s]  
Pulse\_1 = 9.81[us]  
Pulse\_2 = 9.81[us]  
Pulse\_Angle\_1 = 90[deg]  
Pulse\_Angle\_2 = 90[deg]  
T1 = 1[us]  
Unblank\_Time = 2[us]

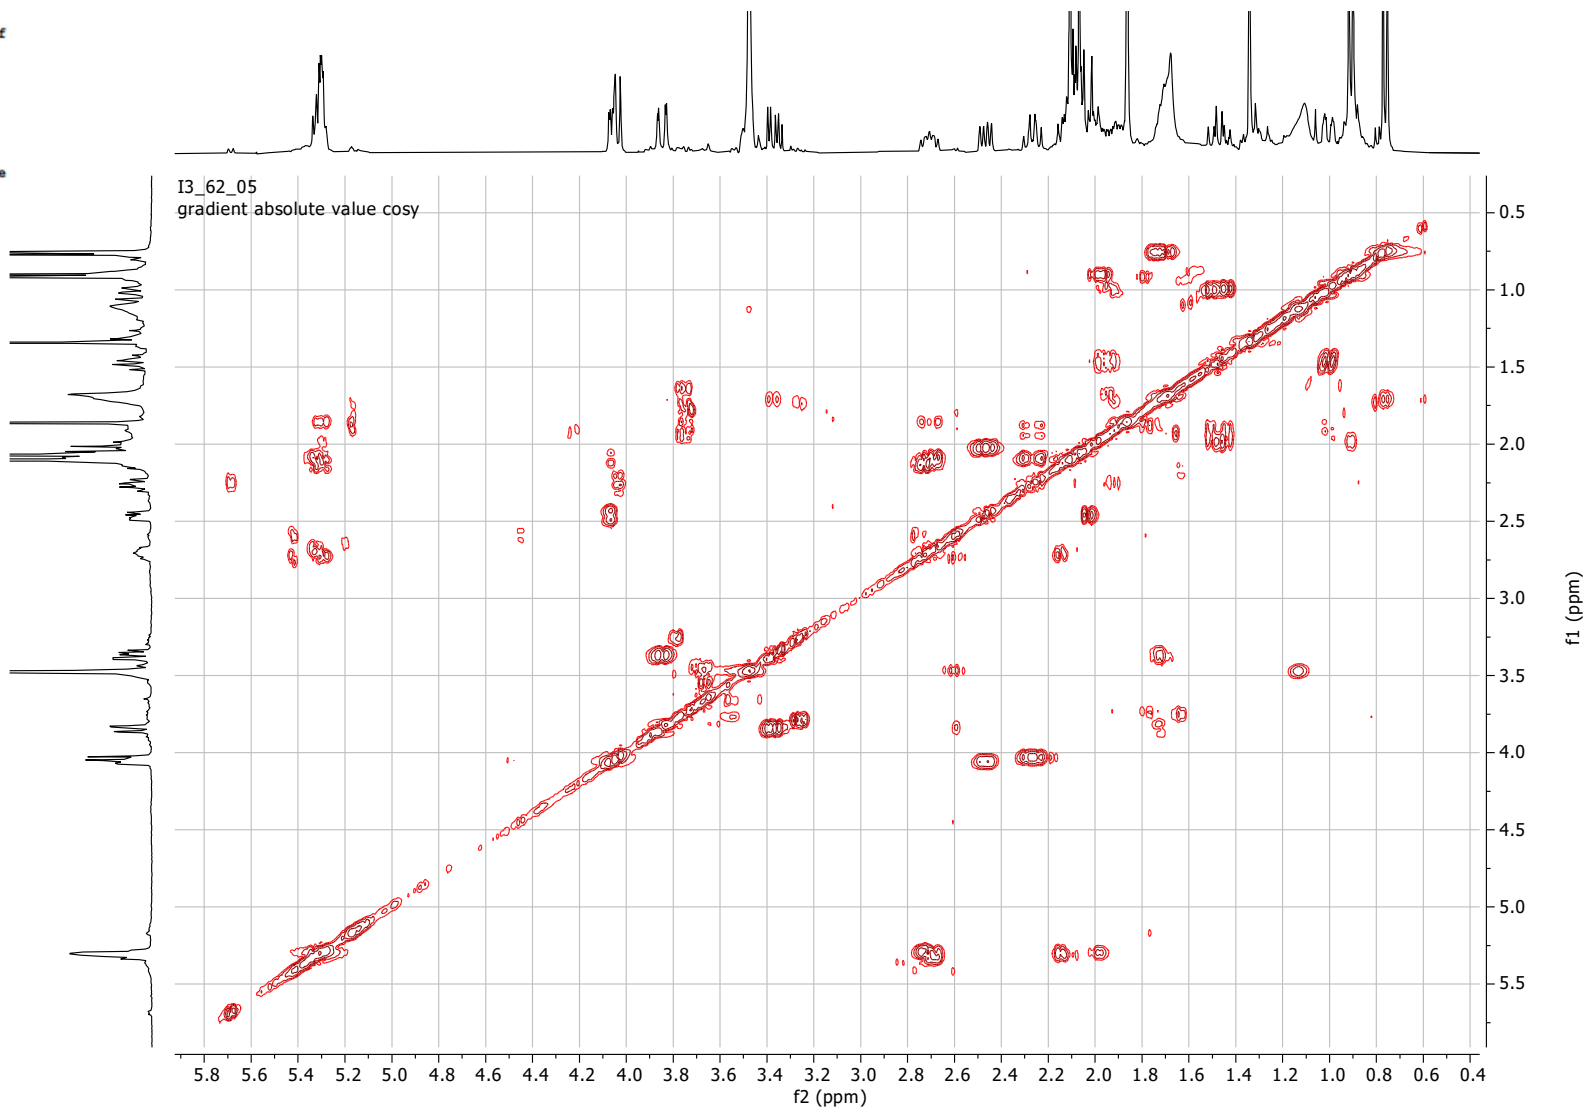

Figure S21. Asbestinin 28, HSQC spectrum

Filename = JF1\_65\_09 hsqc-4.jdf  
Author = DELTA  
Experiment = multiplicity\_hsqc  
Sample\_Id = I3\_62\_05  
Solvent = CHLOROFORM-D  
Actual\_Start\_Time = 4-AUG-2015 04:31:29  
Revision\_Time = 21-AUG-2015 06:18:42

Comment = Multiplicity HSQC  
Data\_Format = 2D COMPLEX COMPLEX  
Dim\_Size = 1024, 512  
X\_Domain = 1H  
Y\_Domain = 13C  
Dim\_Title = 1H 13C  
Dim\_Units = [ppm] [ppm]  
Dimensions = X Y  
Site = Eclipse+ 400  
Spectrometer = DELTA\_NMR

Field\_Strength = 9.389766[T] (400[MHz])  
X\_Acq\_Duration = 0.2832384[s]  
X\_Domain = 1H  
X\_Freq = 399.78219838[MHz]  
X\_Offset = 3.76611[ppm]  
X\_Points = 1024  
X\_Prescans = 4  
X\_Resolution = 3.53059472[Hz]  
X\_Sweep = 3.61532899[kHz]  
Y\_Domain = 13C  
Y\_Freq = 100.52530333[MHz]  
Y\_Offset = 100[ppm]  
Y\_Points = 256  
Y\_Prescans = 0  
Y\_Resolution = 98.64267677[Hz]  
Y\_Sweep = 25.25252525[kHz]  
Clipped = FALSE  
Scans = 8  
Total\_Scans = 2048

Relaxation\_Delay = 2[s]  
Recvr\_Gain = 30  
Temp\_Get = 24.1[dC]  
X\_Acq\_Time = 0.2832384[s]  
X\_Pulse = 9.81[us]  
Y\_Acq\_Time = 10.1376[ms]  
Y\_Pulse = 12[us]  
Enhance\_Temp = 12  
Enhancement = 1/6J  
Grad\_1 = 1[ms]  
Grad\_1\_Amp = 4[pnt]  
Grad\_1\_Value = 4[pnt\*ms]  
Grad\_2 = 1[ms]  
Grad\_2\_Amp = -1[pnt]  
Grad\_2\_Value = -1[pnt\*ms]  
Grad\_3 = 1[ms]  
Grad\_3\_Amp = 1[pnt]  
Grad\_Recover = 0.1[ms]  
Grad\_Selection = 13C = 4:1  
Grad\_Shape = square  
Grad\_Type = 0  
Initial\_Wait = 1[s]  
J\_Constant = 140[Hz]  
T1 = 1[us]  
Tau = 0.5952381[ms]

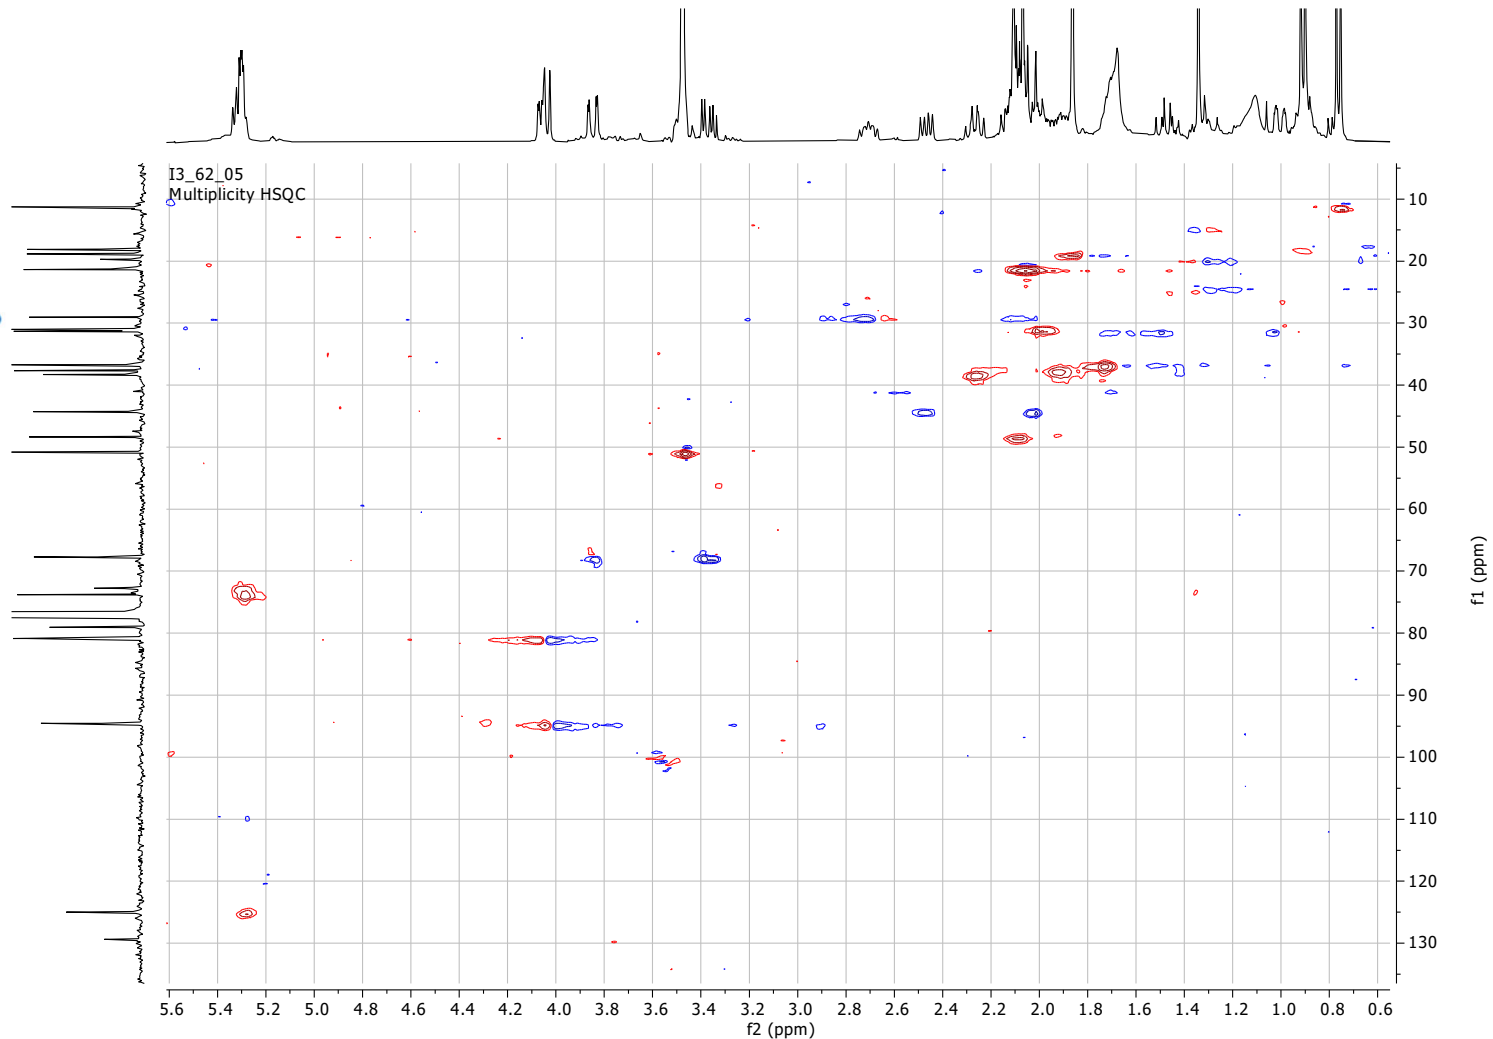

Figure S22. Asbestinin 28, HMBC spectrum

Filename = JF1\_65\_09\_210815\_hmbc-3  
 Author = DELTA  
 Experiment = hmbc\_pfg\_s.exp  
 Sample\_Id = I3\_68\_06  
 Solvent = CHLOROFORM-D  
 Actual\_Start\_Time = 19-AUG-2015 15:04:21  
 Revision\_Time = 22-AUG-2015 01:38:21

Comment = gradient enhanced HMBC  
 Data\_Format = 2D REAL REAL  
 Dim\_Size = 1024, 512  
 X\_Domain = 1H  
 Y\_Domain = 13C  
 Dim\_Title = 1H 13C  
 Dim\_Units = [ppm] [ppm]  
 Dimensions = X Y  
 Site = Eclipse+ 400  
 Spectrometer = DELTA\_NMR

Field\_Strength = 9.389766[T] (400[MHz])  
 X\_Acq\_Duration = 0.2961408[s]  
 X\_Domain = 1H  
 X\_Freq = 399.78219838[MHz]  
 X\_Offset = 3.59946[ppm]  
 X\_Points = 1024  
 X\_Prescans = 4  
 X\_Resolution = 3.37677213[Hz]  
 X\_Sweep = 3.45781466[kHz]  
 Y\_Domain = 13C  
 Y\_Freq = 100.52530333[MHz]  
 Y\_Offset = 100[ppm]  
 Y\_Points = 256  
 Y\_Prescans = 0  
 Y\_Resolution = 98.64267677[Hz]  
 Y\_Sweep = 25.25252525[kHz]  
 Clipped = FALSE  
 Scans = 64  
 Total\_Scans = 16384

Relaxation\_Delay = 2[s]  
 Recvr\_Gain = 30  
 Temp\_Get = 23.5[dC]  
 X\_Acq\_Time = 0.2961408[s]  
 X\_Pulse = 9.81[us]  
 Y\_Acq\_Time = 10.1376[ms]  
 Y\_Pulse = 12[us]  
 Grad\_1 = 1[ms]  
 Grad\_1\_Amp = 10[pnt]  
 Grad\_1\_Value = 10[pnt\*ms]  
 Grad\_2 = 1[ms]  
 Grad\_2\_Amp = 10[pnt]  
 Grad\_2\_Value = 10[pnt\*ms]  
 Grad\_3 = 1[ms]  
 Grad\_3\_Amp = 5[pnt]  
 Grad\_3\_Value = 5[pnt\*ms]  
 Grad\_Recover = 0.2[ms]  
 Grad\_Selection = 13C = 2:2:1  
 Grad\_Shape = square  
 Grad\_Type = 0  
 Initial\_Wait = 1[s]  
 J\_Constant = 140[Hz]  
 Long\_Range\_J = 8[Hz]  
 T1 = 1[us]  
 Unblank\_Time = 2[us]

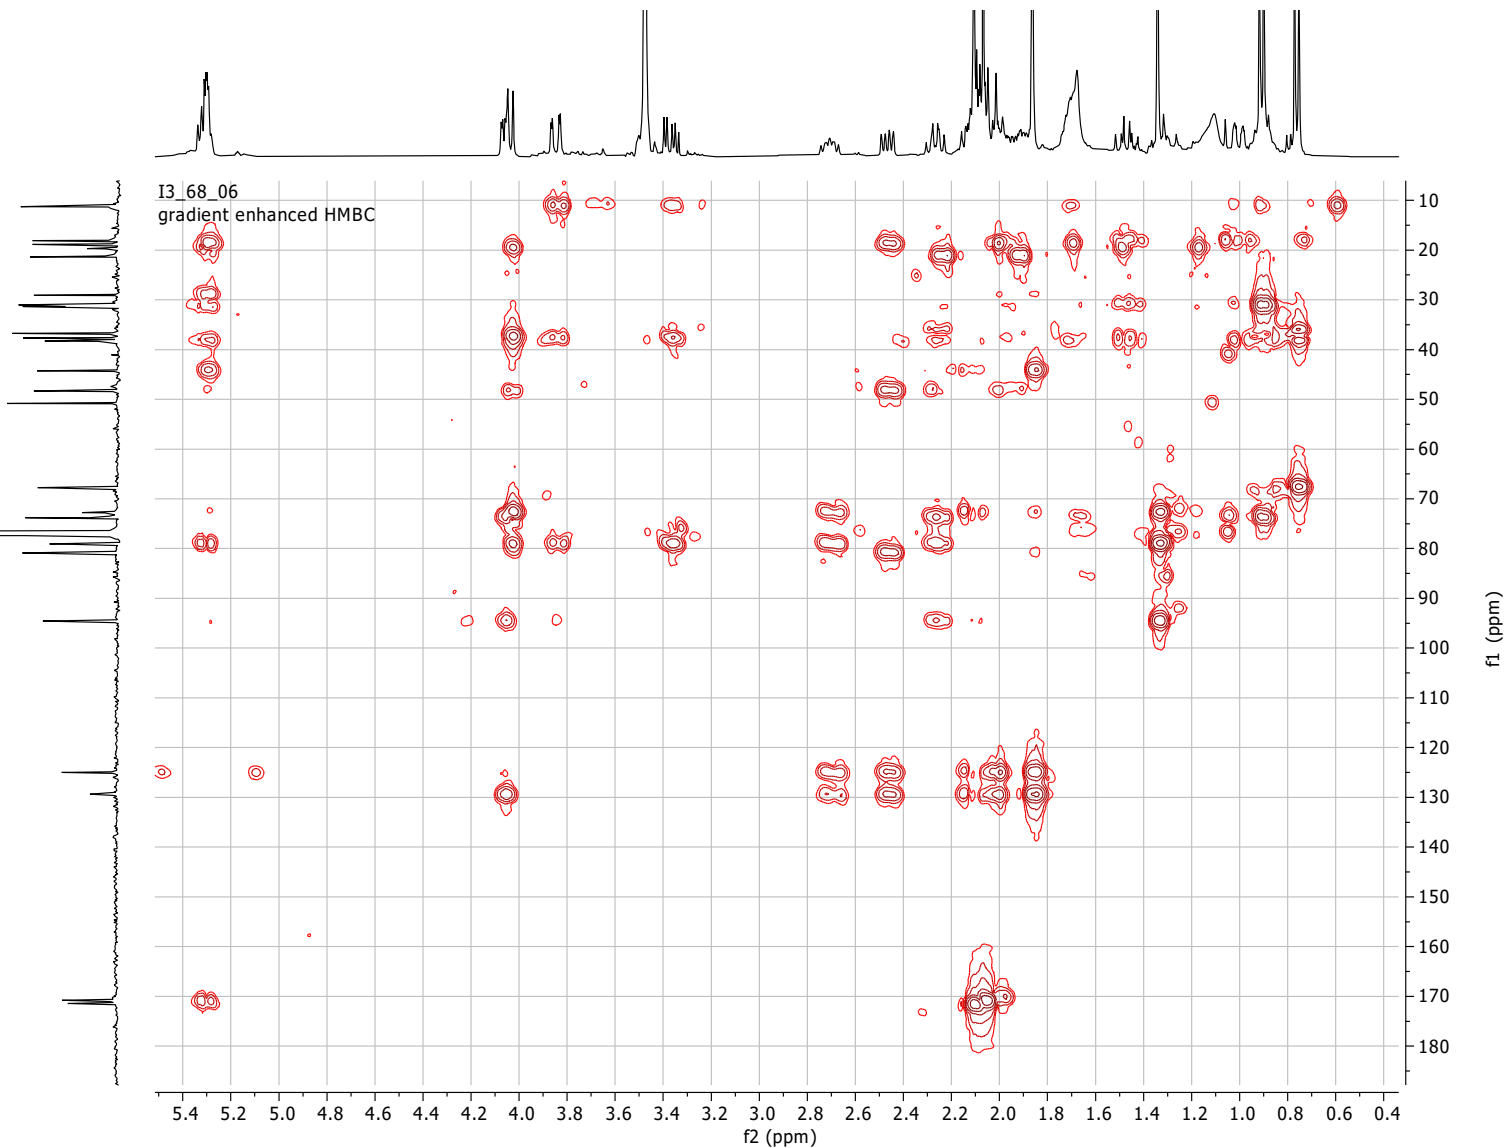

Figure S23. Asbestinin 28, NOE spectra

Irradiation of Proton H-17

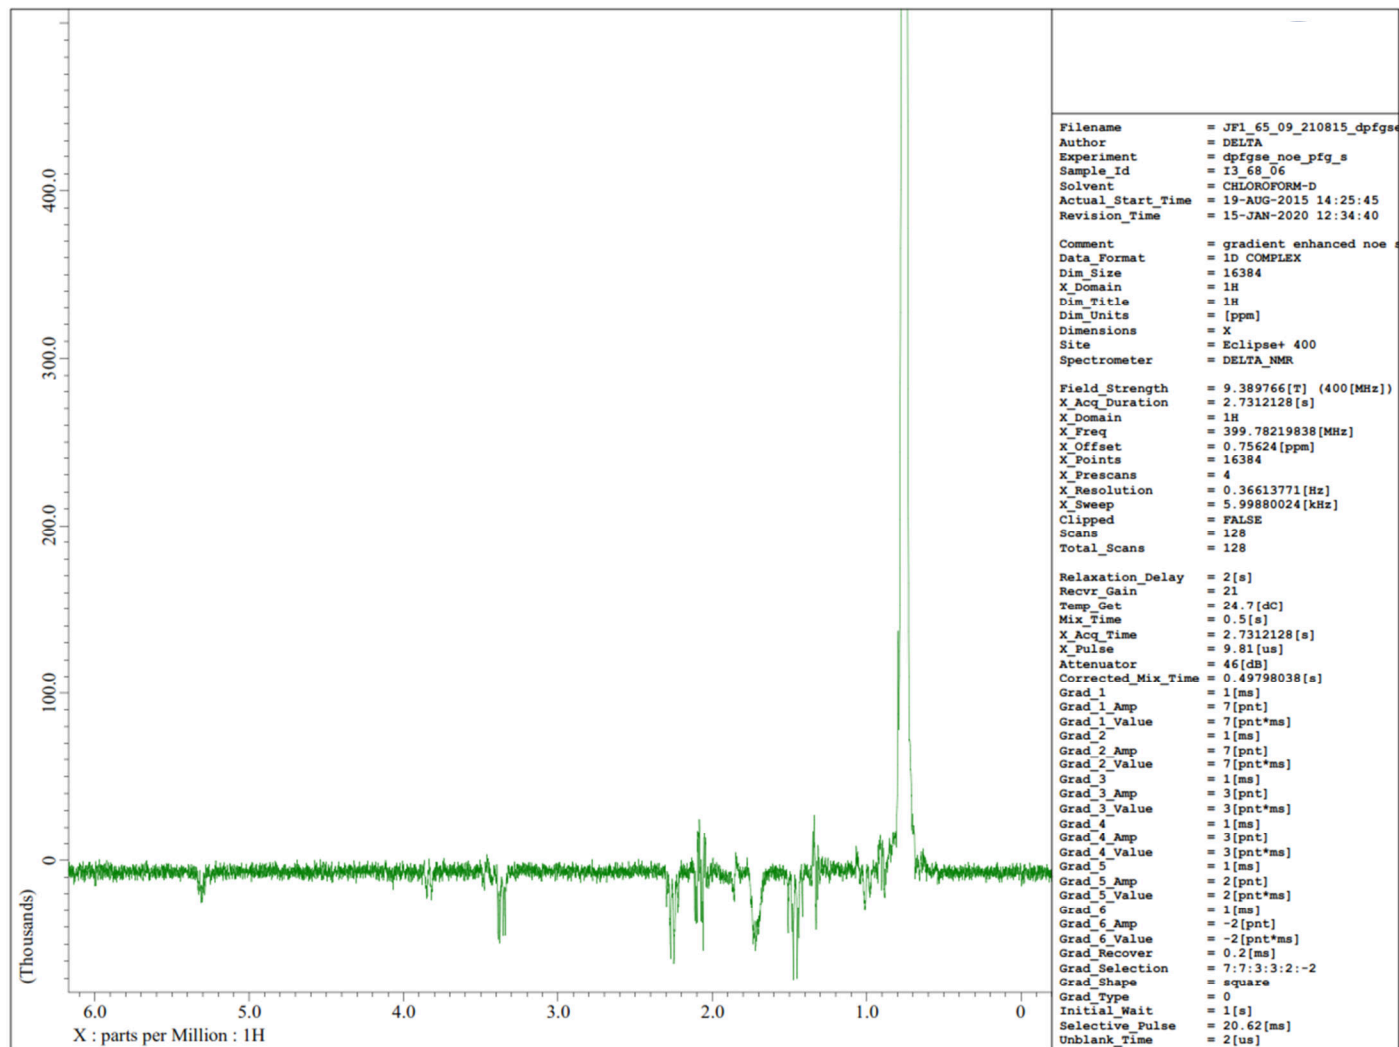

Figure S23. Asbestinin 28, NOE spectra

Irradiation of Proton H-18

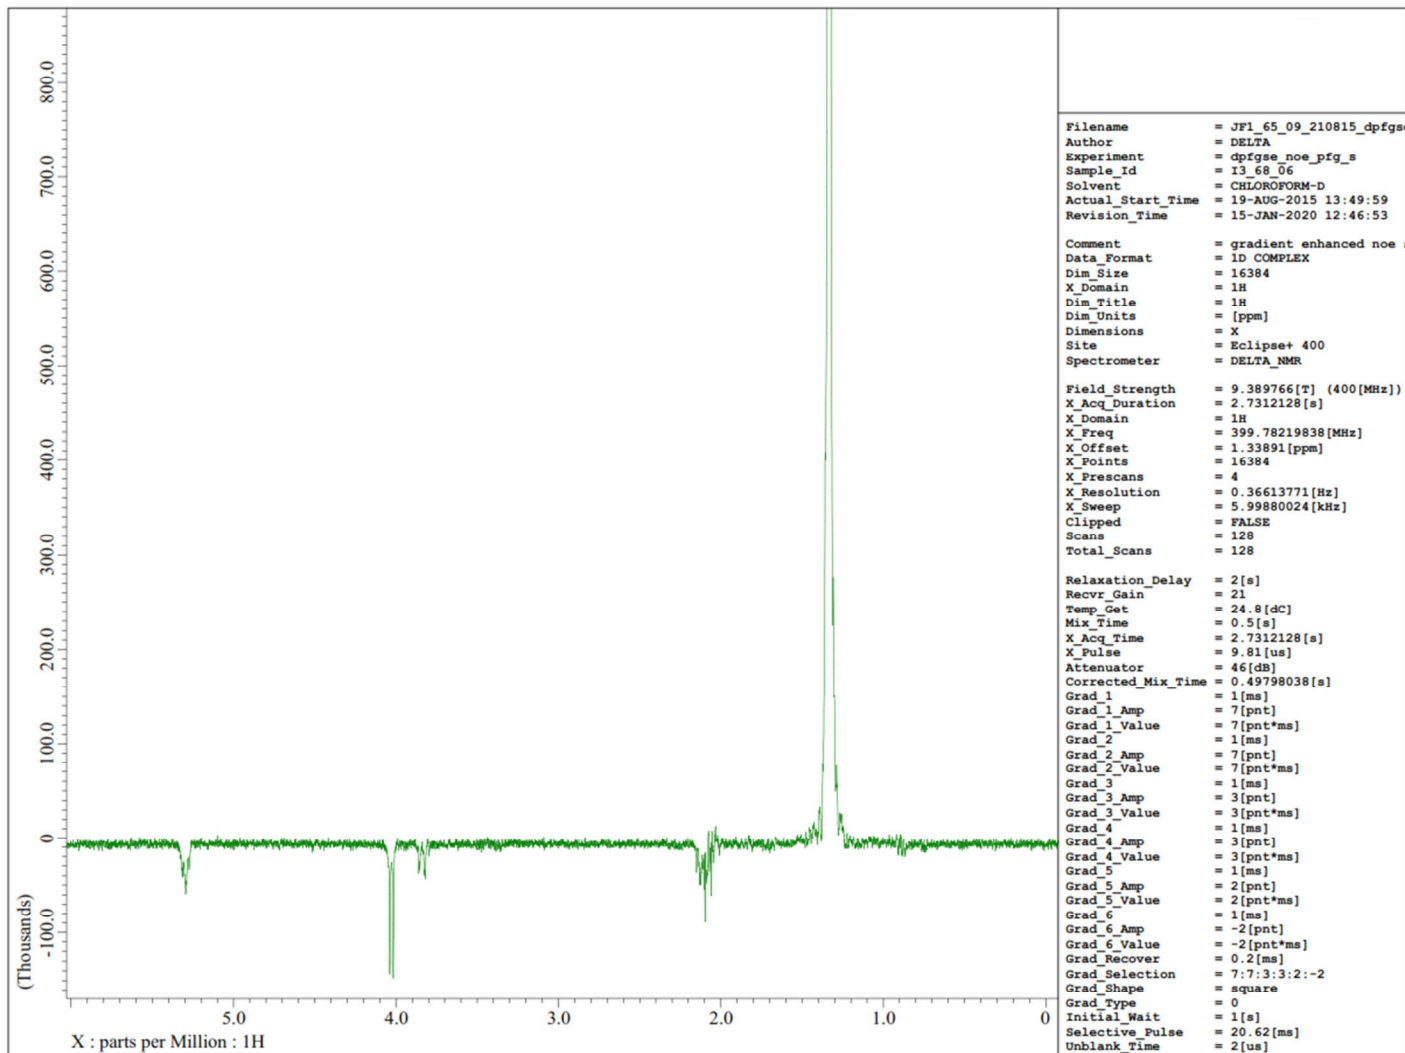



Figure S23. Asbestinin 28, NOE spectra

Irradiation of Proton H-19

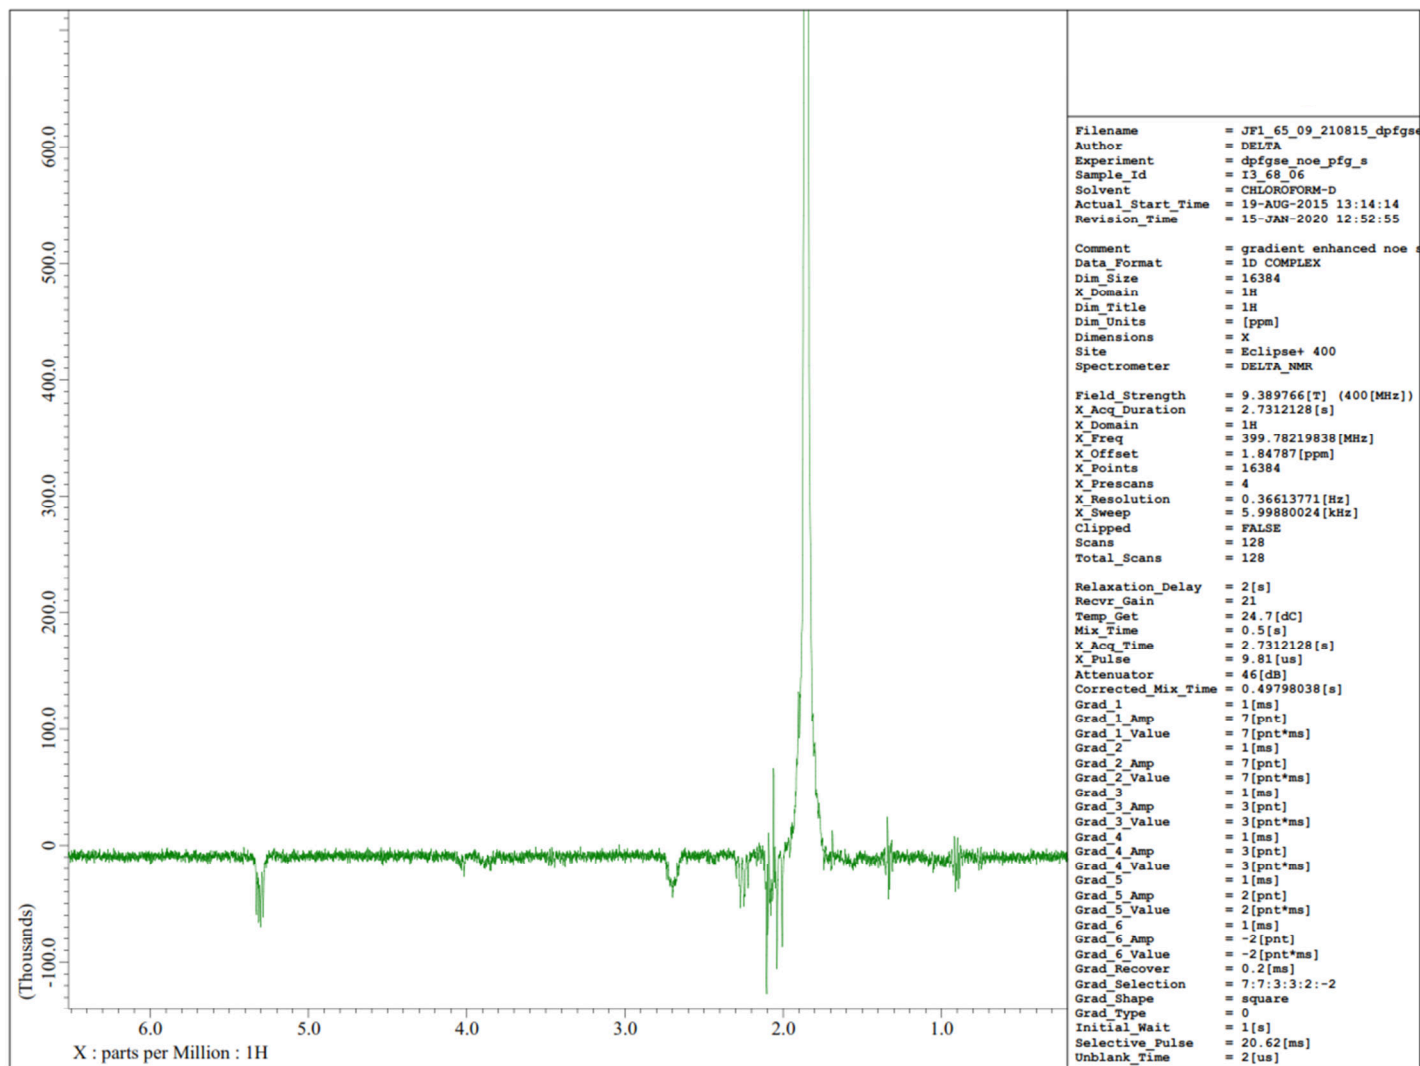

Figure S23. Asbestinin 28, NOE spectra

Irradiation of Proton H-14

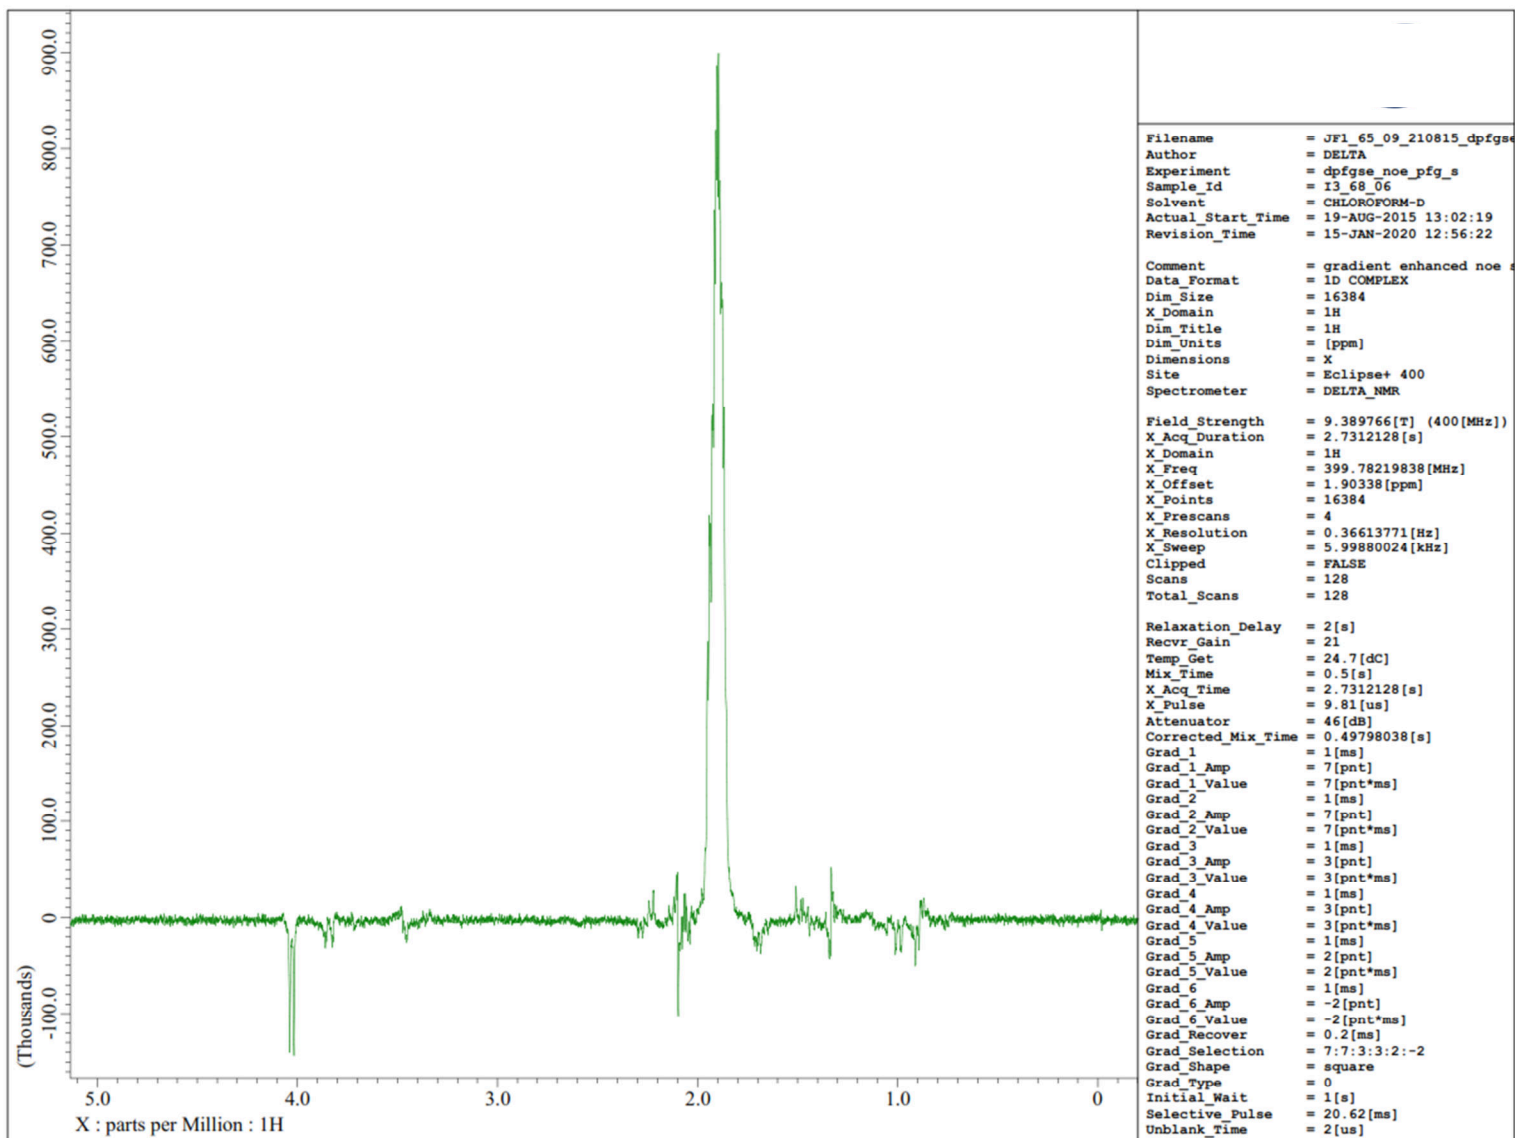

Figure S23. Asbestinin 28, NOE spectra

Irradiation of Proton H-1

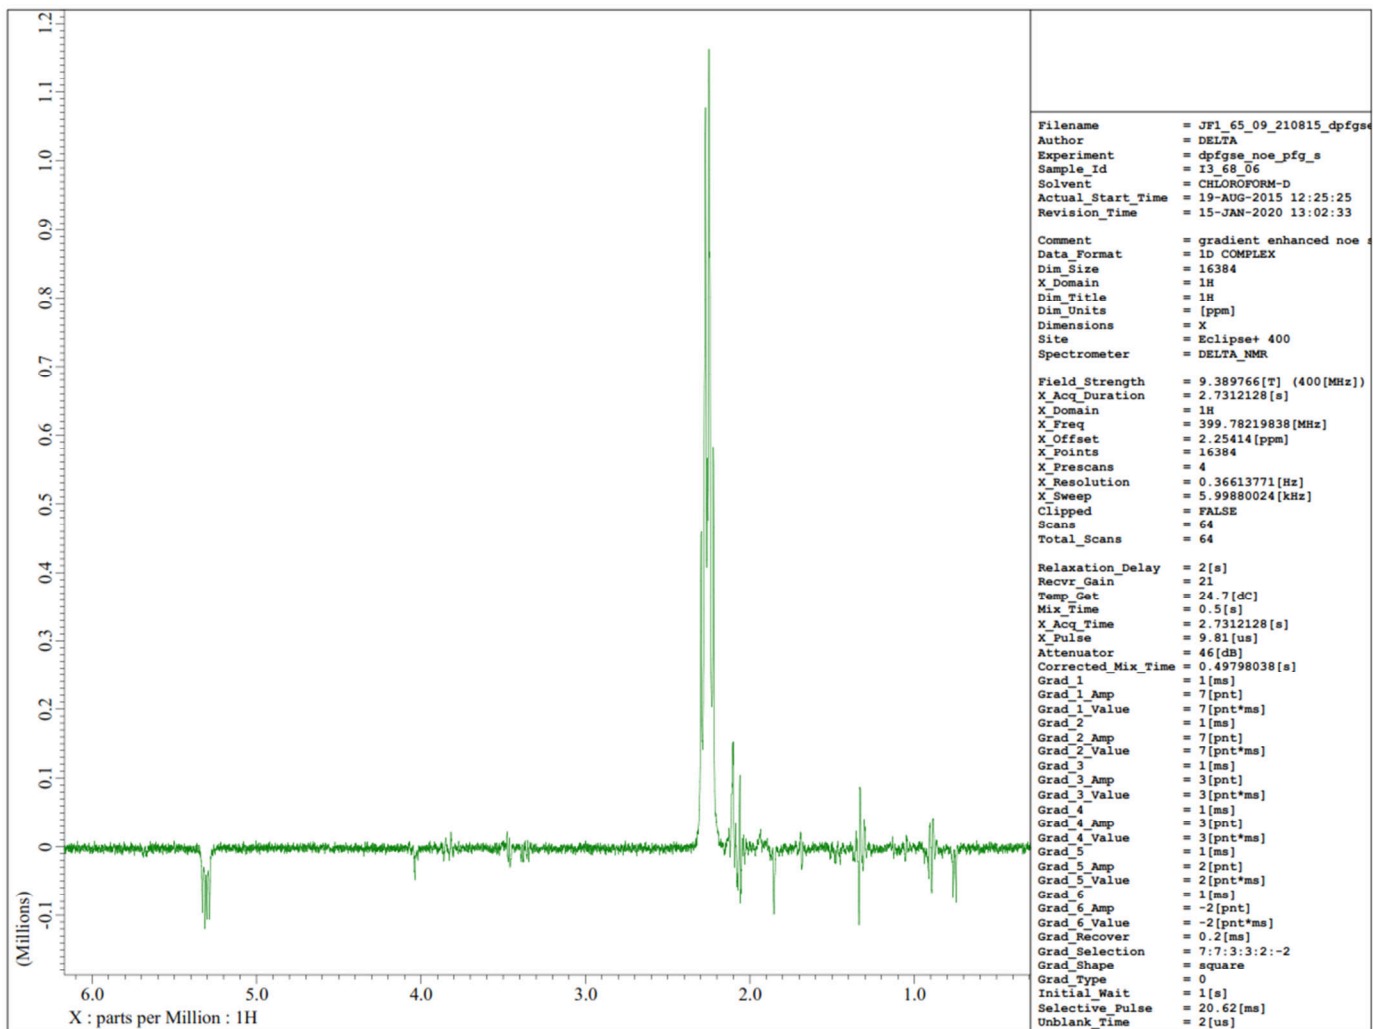

Figure S23. Asbestinin 28, NOE spectra

Irradiation of Proton H-2

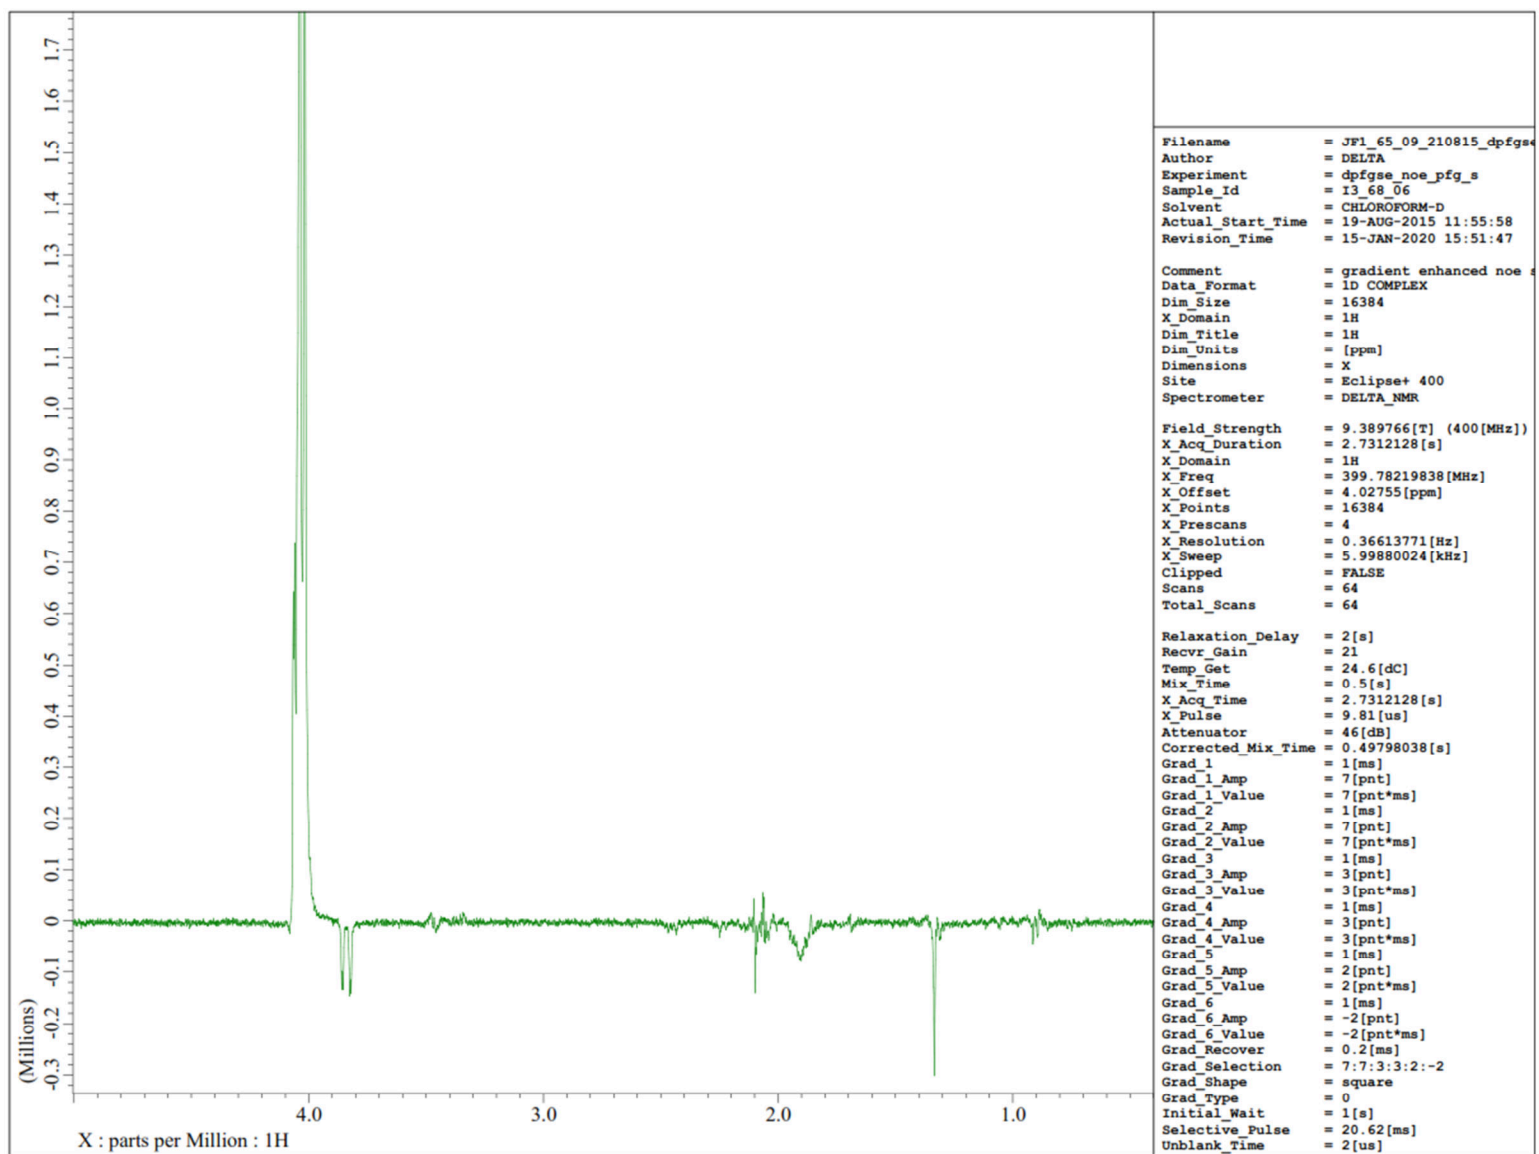

Figure S23. Asbestinin 28, NOE spectra

Irradiation of Proton H-9

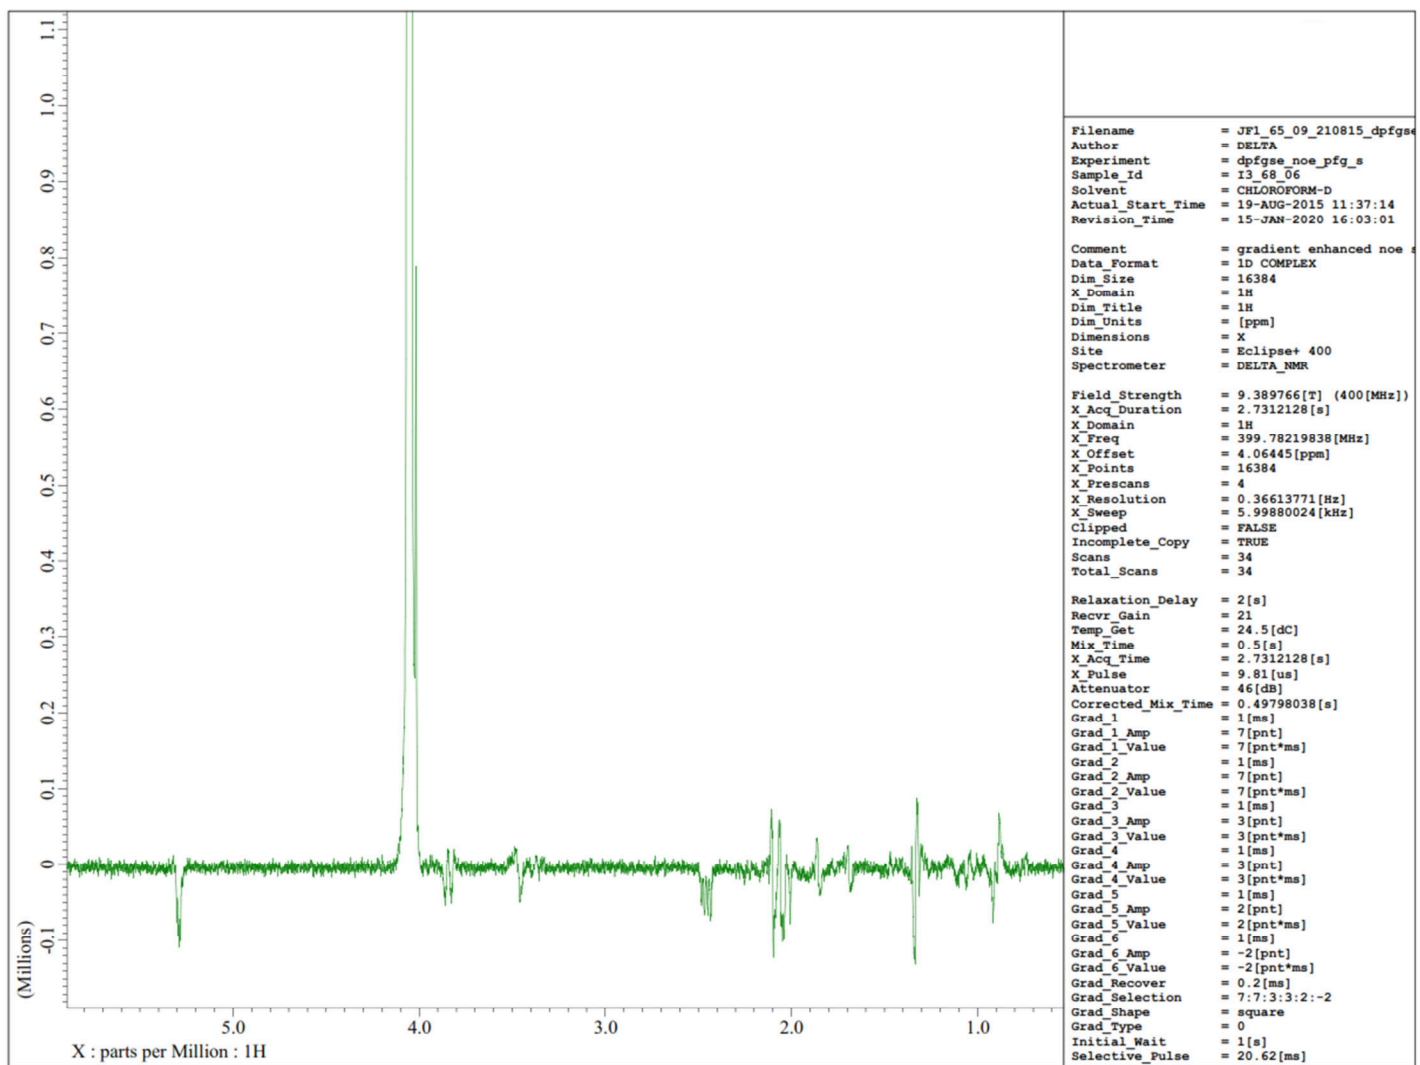

Figure S24. Asbestinin 28, HR-ESITOFMS spectrum

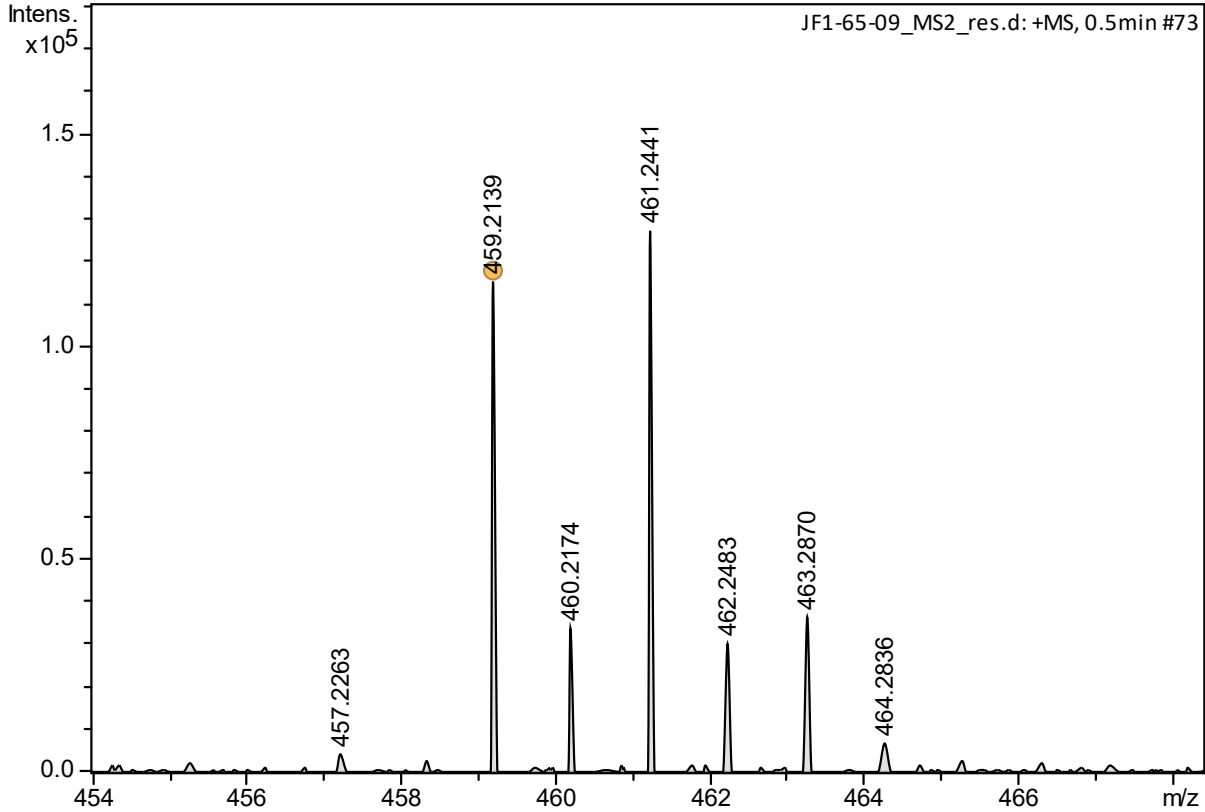

**Table S1.** Viability of THP-1 human macrophages treated with different concentrations of diterpenes. Values are mean  $\pm$  SEM (%) of three independent experiments in duplicate (n = 3).

|                            | % Viability THP-1 macrophages (24 h) |                 |                 |                |                  |
|----------------------------|--------------------------------------|-----------------|-----------------|----------------|------------------|
| ( $\mu$ M)                 | 10                                   | 20              | 50              | 100            | IC <sub>50</sub> |
| Briarellin T ( <b>1</b> )  | 99.5 $\pm$ 2.0                       | 98.5 $\pm$ 1.2  | 101.4 $\pm$ 0.5 | 98.5 $\pm$ 1.0 | > 100            |
| Asbestinin 27 ( <b>2</b> ) | 100.5 $\pm$ 1.3                      | 99.5 $\pm$ 0.9  | 98.6 $\pm$ 2.1  | 97.4 $\pm$ 1.1 | > 100            |
| Asbestinin 28 ( <b>3</b> ) | 98.5 $\pm$ 3.1                       | 99.1 $\pm$ 1.4  | 97.0 $\pm$ 1.0  | 99.5 $\pm$ 2.0 | > 100            |
| Asbestinin 17 ( <b>4</b> ) | 102.2 $\pm$ 1.5                      | 100.5 $\pm$ 0.8 | 98.0 $\pm$ 2.0  | 99.5 $\pm$ 1.2 | > 100            |
